# Supplementary material for: Simulations of lipid bilayers using the CHARMM36 force field with the TIP3P-FB and TIP4P-FB water models
Source: PeerJ. 2018 Aug 14;6:e5472. doi: 10.7717/peerj.5472 (PMC6097494; doi:10.7717/peerj.5472)
Supplement: Supplemental Information 1 [file peerj-06-5472-s001.xlsx]

## Sheet: POPC_simulated
# Neutron scattering profiles calculated from molecular dynamics simulations
q (A-1)	|F|
	TIP3P	TIP3P-FB	TIP4P-FB
0	0.00116724	0.00123126	0.00118148
0.00196349	0.00116695	0.00123084	0.00118112
0.00392699	0.00116607	0.00122958	0.00118005
0.00589048	0.00116461	0.00122748	0.00117826
0.00785397	0.00116257	0.00122454	0.00117577
0.00981747	0.00115994	0.00122078	0.00117257
0.011781	0.00115674	0.00121621	0.00116867
0.0137445	0.00115297	0.00121084	0.00116407
0.0157079	0.00114863	0.00120469	0.0011588
0.0176714	0.00114372	0.00119777	0.00115284
0.0196349	0.00113826	0.00119011	0.00114622
0.0215984	0.00113225	0.00118172	0.00113894
0.0235619	0.00112569	0.00117263	0.00113102
0.0255254	0.00111859	0.00116286	0.00112247
0.0274889	0.00111097	0.00115244	0.00111331
0.0294524	0.00110282	0.0011414	0.00110354
0.0314159	0.00109416	0.00112976	0.00109319
0.0333794	0.00108501	0.00111756	0.00108228
0.0353429	0.00107536	0.00110483	0.00107081
0.0373064	0.00106523	0.00109159	0.00105882
0.0392699	0.00105464	0.00107789	0.00104631
0.0412334	0.00104359	0.00106374	0.00103331
0.0431969	0.0010321	0.00104919	0.00101984
0.0451604	0.00102017	0.00103426	0.00100592
0.0471239	0.00100783	0.00101898	0.000991576
0.0490873	0.000995083	0.00100339	0.000976822
0.0510508	0.000981948	0.000987524	0.000961684
0.0530143	0.000968438	0.000971399	0.000946185
0.0549778	0.000954568	0.000955049	0.000930348
0.0569413	0.000940353	0.000938502	0.000914195
0.0589048	0.000925809	0.000921784	0.00089775
0.0608683	0.00091095	0.000904921	0.000881037
0.0628318	0.000895794	0.000887937	0.000864079
0.0647953	0.000880356	0.000870855	0.000846899
0.0667588	0.000864653	0.000853696	0.00082952
0.0687223	0.000848701	0.000836479	0.000811967
0.0706858	0.000832517	0.000819224	0.000794261
0.0726493	0.000816118	0.000801946	0.000776426
0.0746128	0.000799521	0.000784661	0.000758484
0.0765763	0.000782743	0.000767382	0.000740457
0.0785398	0.000765801	0.000750122	0.000722367
0.0805032	0.000748711	0.000732892	0.000704236
0.0824667	0.000731492	0.0007157	0.000686083
0.0844302	0.000714159	0.000698555	0.000667931
0.0863937	0.000696731	0.000681463	0.000649797
0.0883572	0.000679224	0.000664429	0.000631703
0.0903207	0.000661654	0.000647458	0.000613666
0.0922842	0.00064404	0.000630554	0.000595705
0.0942477	0.000626396	0.000613717	0.000577837
0.0962112	0.00060874	0.000596952	0.000560079
0.0981747	0.000591087	0.000580257	0.000542446
0.100138	0.000573455	0.000563634	0.000524955
0.102102	0.000555858	0.000547083	0.00050762
0.104065	0.000538311	0.000530604	0.000490455
0.106029	0.000520832	0.000514195	0.000473473
0.107992	0.000503433	0.000497858	0.000456686
0.109956	0.00048613	0.000481591	0.000440107
0.111919	0.000468938	0.000465394	0.000423745
0.113883	0.00045187	0.000449268	0.000407612
0.115846	0.000434939	0.000433214	0.000391717
0.11781	0.00041816	0.000417233	0.000376068
0.119773	0.000401545	0.000401326	0.000360673
0.121737	0.000385106	0.000385496	0.00034554
0.1237	0.000368856	0.000369747	0.000330675
0.125664	0.000352805	0.000354082	0.000316085
0.127627	0.000336966	0.000338508	0.000301773
0.129591	0.00032135	0.00032303	0.000287746
0.131554	0.000305965	0.000307654	0.000274006
0.133518	0.000290823	0.00029239	0.000260557
0.135481	0.000275932	0.000277246	0.000247402
0.137445	0.000261301	0.000262232	0.000234543
0.139408	0.00024694	0.000247358	0.000221981
0.141372	0.000232854	0.000232638	0.000209718
0.143335	0.000219053	0.000218082	0.000197754
0.145299	0.000205543	0.000203705	0.00018609
0.147262	0.00019233	0.000189521	0.000174724
0.149226	0.00017942	0.000175545	0.000163657
0.151189	0.000166819	0.000161791	0.000152888
0.153153	0.000154531	0.000148276	0.000142414
0.155116	0.000142561	0.000135016	0.000132234
0.15708	0.000130913	0.000122026	0.000122346
0.159043	0.000119589	0.000109325	0.000112748
0.161006	0.000108594	9.69267e-05	0.000103437
0.16297	9.79292e-05	8.48e-05	9.44109e-05
0.164933	8.76e-05	7.31e-05	8.57e-05
0.166897	7.76e-05	6.17e-05	7.72e-05
0.16886	6.79e-05	5.07e-05	6.9e-05
0.170824	5.86e-05	4.01e-05	6.11e-05
0.172787	4.96e-05	2.98e-05	5.34e-05
0.174751	4.09e-05	2e-05	4.6e-05
0.176714	3.26e-05	1.63e-05	3.89e-05
0.178678	2.46e-05	1.51e-05	3.21e-05
0.180641	1.7e-05	1.57e-05	2.54e-05
0.182605	9.64e-06	1.9e-05	1.91e-05
0.184568	3.6e-06	2.28e-05	1.31e-05
0.186532	4.06e-06	3e-05	1.02e-05
0.188495	1.04e-05	3.67e-05	7.56e-06
0.190459	1.65e-05	4.3e-05	6.25e-06
0.192422	2.22e-05	4.88e-05	9.22e-06
0.194386	2.76e-05	5.42e-05	1.41e-05
0.196349	3.28e-05	5.91e-05	1.89e-05
0.198313	3.76e-05	6.35e-05	2.34e-05
0.200276	4.21e-05	6.75e-05	2.77e-05
0.20224	4.64e-05	7.11e-05	3.17e-05
0.204203	5.03e-05	7.42e-05	3.56e-05
0.206167	5.4e-05	7.69e-05	3.93e-05
0.20813	5.74e-05	7.93e-05	4.28e-05
0.210094	6.06e-05	8.12e-05	4.6e-05
0.212057	6.35e-05	8.28e-05	4.91e-05
0.214021	6.61e-05	8.4e-05	5.2e-05
0.215984	6.85e-05	8.48e-05	5.47e-05
0.217948	7.07e-05	8.54e-05	5.72e-05
0.219911	7.27e-05	8.56e-05	5.95e-05
0.221875	7.44e-05	8.56e-05	6.17e-05
0.223838	7.59e-05	8.53e-05	6.37e-05
0.225802	7.72e-05	8.48e-05	6.55e-05
0.227765	7.83e-05	8.41e-05	6.71e-05
0.229729	7.92e-05	8.32e-05	6.86e-05
0.231692	8e-05	8.21e-05	6.99e-05
0.233656	8.05e-05	8.09e-05	7.11e-05
0.235619	8.09e-05	7.96e-05	7.21e-05
0.237583	8.12e-05	7.82e-05	7.3e-05
0.239546	8.13e-05	7.67e-05	7.37e-05
0.24151	8.12e-05	7.51e-05	7.43e-05
0.243473	8.1e-05	7.35e-05	7.47e-05
0.245437	8.07e-05	7.19e-05	7.5e-05
0.2474	8.03e-05	7.03e-05	7.52e-05
0.249364	7.98e-05	6.88e-05	7.52e-05
0.251327	7.91e-05	6.72e-05	7.51e-05
0.253291	7.84e-05	6.57e-05	7.5e-05
0.255254	7.76e-05	6.43e-05	7.46e-05
0.257218	7.67e-05	6.29e-05	7.42e-05
0.259181	7.57e-05	6.16e-05	7.37e-05
0.261145	7.46e-05	6.05e-05	7.31e-05
0.263108	7.35e-05	5.94e-05	7.24e-05
0.265072	7.24e-05	5.84e-05	7.16e-05
0.267035	7.12e-05	5.75e-05	7.07e-05
0.268999	6.99e-05	5.67e-05	6.98e-05
0.270962	6.86e-05	5.61e-05	6.87e-05
0.272926	6.73e-05	5.55e-05	6.76e-05
0.274889	6.6e-05	5.5e-05	6.65e-05
0.276853	6.46e-05	5.47e-05	6.53e-05
0.278816	6.33e-05	5.44e-05	6.4e-05
0.28078	6.19e-05	5.42e-05	6.27e-05
0.282743	6.05e-05	5.41e-05	6.13e-05
0.284707	5.91e-05	5.41e-05	5.99e-05
0.28667	5.78e-05	5.42e-05	5.85e-05
0.288634	5.64e-05	5.43e-05	5.7e-05
0.290597	5.51e-05	5.44e-05	5.56e-05
0.292561	5.37e-05	5.46e-05	5.41e-05
0.294524	5.24e-05	5.48e-05	5.26e-05
0.296488	5.11e-05	5.5e-05	5.11e-05
0.298451	4.99e-05	5.53e-05	4.96e-05
0.300415	4.87e-05	5.55e-05	4.81e-05
0.302378	4.75e-05	5.56e-05	4.66e-05
0.304342	4.63e-05	5.58e-05	4.51e-05
0.306305	4.52e-05	5.59e-05	4.36e-05
0.308269	4.41e-05	5.6e-05	4.22e-05
0.310232	4.31e-05	5.6e-05	4.08e-05
0.312196	4.21e-05	5.59e-05	3.94e-05
0.314159	4.11e-05	5.57e-05	3.8e-05
0.316122	4.02e-05	5.55e-05	3.67e-05
0.318086	3.93e-05	5.51e-05	3.55e-05
0.320049	3.85e-05	5.47e-05	3.42e-05
0.322013	3.77e-05	5.41e-05	3.31e-05
0.323976	3.69e-05	5.35e-05	3.19e-05
0.32594	3.62e-05	5.27e-05	3.08e-05
0.327903	3.56e-05	5.19e-05	2.98e-05
0.329867	3.5e-05	5.09e-05	2.88e-05
0.33183	3.44e-05	4.98e-05	2.79e-05
0.333794	3.39e-05	4.87e-05	2.71e-05
0.335757	3.34e-05	4.74e-05	2.63e-05
0.337721	3.29e-05	4.6e-05	2.55e-05
0.339684	3.25e-05	4.46e-05	2.48e-05
0.341648	3.21e-05	4.31e-05	2.42e-05
0.343611	3.18e-05	4.15e-05	2.36e-05
0.345575	3.14e-05	3.98e-05	2.31e-05
0.347538	3.12e-05	3.81e-05	2.26e-05
0.349502	3.09e-05	3.64e-05	2.22e-05
0.351465	3.07e-05	3.46e-05	2.19e-05
0.353429	3.05e-05	3.28e-05	2.16e-05
0.355392	3.03e-05	3.1e-05	2.13e-05
0.357356	3.01e-05	2.93e-05	2.11e-05
0.359319	2.99e-05	2.75e-05	2.1e-05
0.361283	2.98e-05	2.58e-05	2.09e-05
0.363246	2.97e-05	2.41e-05	2.08e-05
0.36521	2.96e-05	2.24e-05	2.08e-05
0.367173	2.95e-05	2.09e-05	2.08e-05
0.369137	2.93e-05	1.94e-05	2.08e-05
0.3711	2.92e-05	1.85e-05	2.08e-05
0.373064	2.91e-05	1.97e-05	2.09e-05
0.375027	2.9e-05	2.08e-05	2.1e-05
0.376991	2.89e-05	2.18e-05	2.11e-05
0.378954	2.88e-05	2.27e-05	2.12e-05
0.380918	2.87e-05	2.34e-05	2.14e-05
0.382881	2.85e-05	2.4e-05	2.15e-05
0.384845	2.84e-05	2.44e-05	2.16e-05
0.386808	2.82e-05	2.47e-05	2.18e-05
0.388772	2.8e-05	2.49e-05	2.19e-05
0.390735	2.78e-05	2.48e-05	2.2e-05
0.392699	2.76e-05	2.46e-05	2.21e-05
0.394662	2.73e-05	2.43e-05	2.22e-05
0.396626	2.7e-05	2.37e-05	2.22e-05
0.398589	2.67e-05	2.31e-05	2.23e-05

## Sheet: POPC_exptl
##################################################################################
## experimental scattering form factors obtained for ULV data
## Kucerka et al., Biochim Biophys Acta - Biomembranes 1808 (2011) 2761-2771
##################################################################################
##
## redefinition of scattering power for D such that water corresponds to 100% D2O
#SLwin
#set b(1) 6.67e-005
#setRHO_wat N 6.352e-006
#updateSIM
##
q	|F(q)|	deltaF
0.03157	0.00021915	1e-06
0.03345	0.000218	1e-06
0.03533	0.00021726	1e-06
0.0372	0.0002148	1e-06
0.03908	0.00021383	1e-06
0.04096	0.00021125	1e-06
0.04284	0.00021023	1e-06
0.04472	0.00020647	1e-06
0.0466	0.00020576	1e-06
0.04847	0.00020272	1e-06
0.05035	0.00020059	1e-06
0.05223	0.00019881	1e-06
0.05411	0.00019421	1e-06
0.05599	0.00019182	1e-06
0.05787	0.00018932	1e-06
0.05975	0.00018661	1e-06
0.06162	0.00018429	1e-06
0.0635	0.0001811	1e-06
0.06538	0.00017749	1e-06
0.06726	0.00017489	1e-06
0.06914	0.00017187	1e-06
0.07102	0.00016873	1e-06
0.0729	0.00016552	1e-06
0.07477	0.00016208	1e-06
0.07665	0.00015749	1e-06
0.07853	0.00015622	1e-06
0.08041	0.00015142	1e-06
0.08229	0.00014898	1e-06
0.08417	0.00014576	1e-06
0.08605	0.00014181	1e-06
0.08792	0.00013774	1e-06
0.0898	0.00013428	1e-06
0.09168	0.00013206	1e-06
0.09356	0.00012658	1e-06
0.09544	0.00012535	1e-06
0.09732	0.00012089	1e-06
0.0992	0.000116	1e-06
0.10107	0.00011402	1e-06
0.10295	0.00010939	1e-06
0.10483	0.00010684	1e-06
0.10671	0.00010342	1e-06
0.10859	0.00010054	1e-06
0.11047	9.7976e-05	1e-06
0.11234	9.1448e-05	1e-06
0.11422	8.934e-05	1e-06
0.1161	8.6437e-05	1e-06
0.11798	8.2014e-05	1e-06
0.11986	8.0239e-05	1e-06
0.12174	7.4417e-05	1e-06
0.12362	7.2451e-05	1e-06
0.12549	7.1323e-05	1e-06
0.12737	6.5382e-05	1e-06
0.12925	6.2508e-05	1e-06
0.13113	6.3585e-05	1e-06
0.13301	5.5756e-05	1e-06
0.13489	5.4705e-05	1e-06
0.13677	5.3599e-05	1e-06
0.13864	5.0627e-05	1e-06
0.14052	4.7614e-05	1e-06
0.1424	4.4585e-05	1e-06
0.14428	4.206e-05	1e-06
0.14616	3.7096e-05	1e-06
0.14804	3.8305e-05	1e-06
0.14992	3.512e-05	1e-06
0.15179	3.8721e-05	1e-05
0.15367	3.1489e-05	1e-05
0.15555	2.6953e-05	1e-05
0.15743	2.5974e-05	1e-05
0.15931	2.4651e-05	1e-05
0.16119	1.8032e-05	1e-05
0.16306	2.151e-05	1e-05
0.16494	2.003e-05	1e-05
0.16682	1.6233e-05	1e-05
0.1687	2.1827e-05	1e-05
0.17058	1.2426e-05	1e-05
0.17246	7.0378e-06	1e-05
0.17434	1.4185e-05	1e-05
0.17621	1.6321e-05	1e-05
0.17809	6.0936e-06	1e-05
0.17997	8.7977e-06	1e-05
0.18185	-8.9484e-06	1e-05
0.18373	2.0868e-05	1e-05
0.18561	2.2116e-05	1e-05
0.18749	-1.6703e-05	1e-05
0.18936	-4.9484e-06	1e-05
0.19124	-1.1418e-05	1e-05
0.19312	-5.3557e-06	1e-05
0.195	7.9853e-06	1e-05
0.19688	-1.9452e-05	1e-05
0.19876	3.1307e-05	1e-05
0.20064	2.1877e-05	0.0001
0.20251	8.0149e-06	0.0001
0.20439	1.961e-05	0.0001
0.20627	-2.5315e-05	0.0001
0.20815	2.6173e-05	0.0001
0.21003	2.3174e-05	0.0001
0.21191	2.1369e-05	0.0001
0.21379	-1.489e-05	0.0001
0.21566	1.5454e-05	0.0001
0.21754	-2.2245e-05	0.0001
0.21942	2.7071e-05	0.0001
0.2213	1.3874e-05	0.0001
0.22318	-2.062e-06	0.0001
0.22506	1.9954e-05	0.0001
0.22693	-7.7294e-06	0.0001
0.22881	9.6462e-06	0.0001
0.23069	8.3239e-06	0.0001
0.23257	1.3194e-05	0.0001
0.23445	1.1308e-05	0.0001
0.23633	-2.3719e-05	0.0001
0.23821	5.621e-06	0.0001
0.24008	1.3804e-05	0.0001
0.24196	9.8885e-06	0.0001
0.24384	-2.2993e-05	0.0001
0.24572	1.4196e-05	0.0001
0.2476	-2.066e-05	0.0001
0.24948	-7.45e-06	0.0001
0.25136	-3.6336e-05	0.0001
0.25323	2.142e-05	0.0001
0.25511	-1.3438e-05	0.0001
0.25699	-1.0565e-05	0.0001
0.25887	-2.76e-05	0.0001
0.26075	1.6743e-05	0.0001
0.26263	-3.5025e-05	0.0001
0.26451	1.8309e-05	0.0001
0.26638	7.6645e-06	0.0001
0.26826	-1.9749e-05	0.0001
0.27014	8.1912e-06	0.0001
0.27202	2.4082e-05	0.0001
0.2739	-2.1344e-05	0.0001
0.27578	-2.8694e-05	0.0001
0.27765	1.4371e-05	0.0001
0.27953	-2.8174e-05	0.0001
0.28141	-2.6235e-05	0.0001
0.28329	-3.143e-05	0.0001
0.28517	2.3211e-05	0.0001
0.28705	-2.9547e-05	0.0001
0.28893	-8.3666e-06	0.0001
0.2908	2.8564e-05	0.0001
0.29268	-1.7378e-05	0.0001
0.29456	2.4701e-05	0.0001
0.29644	-2.8866e-05	0.0001
0.29832	1.0255e-05	0.0001

## Sheet: DPPC_simulated
# Neutron scattering profiles calculated from molecular dynamics simulations
q (A-1)	|F|
	TIP3P	TIP3P-FB	TIP4P-FB
0	0.00123838	0.00126232	0.0012389
0.00196349	0.00123801	0.00126194	0.00123854
0.00392699	0.00123692	0.00126081	0.00123745
0.00589048	0.00123509	0.00125892	0.00123565
0.00785397	0.00123253	0.00125629	0.00123313
0.00981747	0.00122926	0.00125291	0.00122989
0.011781	0.00122526	0.00124878	0.00122595
0.0137445	0.00122055	0.00124393	0.0012213
0.0157079	0.00121514	0.00123834	0.00121595
0.0176714	0.00120903	0.00123204	0.00120992
0.0196349	0.00120224	0.00122503	0.00120321
0.0215984	0.00119477	0.00121732	0.00119583
0.0235619	0.00118663	0.00120893	0.00118779
0.0255254	0.00117785	0.00119986	0.00117911
0.0274889	0.00116842	0.00119013	0.00116979
0.0294524	0.00115837	0.00117976	0.00115985
0.0314159	0.00114771	0.00116876	0.00114931
0.0333794	0.00113645	0.00115715	0.00113818
0.0353429	0.00112462	0.00114494	0.00112647
0.0373064	0.00111223	0.00113215	0.00111421
0.0392699	0.0010993	0.0011188	0.00110141
0.0412334	0.00108584	0.00110492	0.00108808
0.0431969	0.00107189	0.00109052	0.00107426
0.0451604	0.00105745	0.00107562	0.00105995
0.0471239	0.00104254	0.00106024	0.00104518
0.0490873	0.0010272	0.0010444	0.00102996
0.0510508	0.00101144	0.00102814	0.00101433
0.0530143	0.000995279	0.00101146	0.000998294
0.0549778	0.000978744	0.0009944	0.00098188
0.0569413	0.000961856	0.000976973	0.000965109
0.0589048	0.000944638	0.000959206	0.000948004
0.0608683	0.000927114	0.000941123	0.000930586
0.0628318	0.000909305	0.000922746	0.000912879
0.0647953	0.000891235	0.000904102	0.000894905
0.0667588	0.000872928	0.000885212	0.000876687
0.0687223	0.000854406	0.000866103	0.000858247
0.0706858	0.000835693	0.000846796	0.000839608
0.0726493	0.000816812	0.000827317	0.000820793
0.0746128	0.000797786	0.000807689	0.000801825
0.0765763	0.000778636	0.000787936	0.000782726
0.0785398	0.000759386	0.000768081	0.000763517
0.0805032	0.000740059	0.000748147	0.000744222
0.0824667	0.000720674	0.000728157	0.000724861
0.0844302	0.000701255	0.000708132	0.000705456
0.0863937	0.000681823	0.000688096	0.000686029
0.0883572	0.000662397	0.000668069	0.000666599
0.0903207	0.000642998	0.000648074	0.000647188
0.0922842	0.000623646	0.000628129	0.000627815
0.0942477	0.00060436	0.000608256	0.000608499
0.0962112	0.000585159	0.000588473	0.000589259
0.0981747	0.000566061	0.000568801	0.000570114
0.100138	0.000547083	0.000549256	0.000551081
0.102102	0.000528242	0.000529858	0.000532178
0.104065	0.000509554	0.000510622	0.000513421
0.106029	0.000491036	0.000491565	0.000494826
0.107992	0.000472702	0.000472703	0.000476409
0.109956	0.000454566	0.000454052	0.000458185
0.111919	0.000436642	0.000435624	0.000440168
0.113883	0.000418943	0.000417435	0.00042237
0.115846	0.000401482	0.000399496	0.000404806
0.11781	0.000384269	0.000381821	0.000387487
0.119773	0.000367316	0.00036442	0.000370425
0.121737	0.000350632	0.000347304	0.00035363
0.1237	0.000334229	0.000330483	0.000337113
0.125664	0.000318113	0.000313968	0.000320883
0.127627	0.000302294	0.000297765	0.000304949
0.129591	0.000286778	0.000281883	0.000289319
0.131554	0.000271573	0.00026633	0.000274001
0.133518	0.000256685	0.000251112	0.000259
0.135481	0.000242119	0.000236234	0.000244325
0.137445	0.00022788	0.000221702	0.000229979
0.139408	0.000213973	0.000207521	0.000215968
0.141372	0.000200401	0.000193694	0.000202296
0.143335	0.000187168	0.000180224	0.000188967
0.145299	0.000174275	0.000167115	0.000175984
0.147262	0.000161725	0.000154368	0.000163349
0.149226	0.000149519	0.000141985	0.000151065
0.151189	0.000137659	0.000129966	0.000139132
0.153153	0.000126145	0.000118313	0.000127552
0.155116	0.000114976	0.000107025	0.000116325
0.15708	0.000104153	9.61e-05	0.000105
0.159043	9.37e-05	8.55e-05	9.49e-05
0.161006	8.35e-05	7.53e-05	8.48e-05
0.16297	7.37e-05	6.55e-05	7.49e-05
0.164933	6.43e-05	5.6e-05	6.55e-05
0.166897	5.52e-05	4.69e-05	5.63e-05
0.16886	4.64e-05	3.81e-05	4.76e-05
0.170824	3.79e-05	2.97e-05	3.91e-05
0.172787	2.98e-05	2.16e-05	3.1e-05
0.174751	2.2e-05	1.39e-05	2.32e-05
0.176714	1.46e-05	6.87e-06	1.58e-05
0.178678	7.4e-06	8.29e-06	8.67e-06
0.180641	3.69e-06	1.05e-05	4.74e-06
0.182605	6.01e-06	1.37e-05	4.64e-06
0.184568	1.22e-05	1.98e-05	1.08e-05
0.186532	1.81e-05	2.56e-05	1.67e-05
0.188495	2.38e-05	3.11e-05	2.22e-05
0.190459	2.91e-05	3.63e-05	2.75e-05
0.192422	3.42e-05	4.12e-05	3.25e-05
0.194386	3.9e-05	4.58e-05	3.72e-05
0.196349	4.35e-05	5.01e-05	4.16e-05
0.198313	4.77e-05	5.41e-05	4.58e-05
0.200276	5.17e-05	5.79e-05	4.97e-05
0.20224	5.54e-05	6.14e-05	5.33e-05
0.204203	5.89e-05	6.46e-05	5.67e-05
0.206167	6.21e-05	6.76e-05	5.98e-05
0.20813	6.51e-05	7.04e-05	6.27e-05
0.210094	6.79e-05	7.29e-05	6.54e-05
0.212057	7.04e-05	7.52e-05	6.78e-05
0.214021	7.27e-05	7.73e-05	7e-05
0.215984	7.48e-05	7.91e-05	7.21e-05
0.217948	7.66e-05	8.08e-05	7.39e-05
0.219911	7.83e-05	8.22e-05	7.55e-05
0.221875	7.98e-05	8.35e-05	7.69e-05
0.223838	8.11e-05	8.45e-05	7.81e-05
0.225802	8.22e-05	8.54e-05	7.91e-05
0.227765	8.31e-05	8.61e-05	8e-05
0.229729	8.38e-05	8.66e-05	8.07e-05
0.231692	8.44e-05	8.7e-05	8.13e-05
0.233656	8.48e-05	8.72e-05	8.17e-05
0.235619	8.51e-05	8.73e-05	8.19e-05
0.237583	8.52e-05	8.72e-05	8.2e-05
0.239546	8.51e-05	8.7e-05	8.2e-05
0.24151	8.49e-05	8.66e-05	8.19e-05
0.243473	8.46e-05	8.62e-05	8.16e-05
0.245437	8.42e-05	8.56e-05	8.12e-05
0.2474	8.37e-05	8.49e-05	8.08e-05
0.249364	8.3e-05	8.41e-05	8.02e-05
0.251327	8.22e-05	8.32e-05	7.95e-05
0.253291	8.14e-05	8.23e-05	7.87e-05
0.255254	8.04e-05	8.12e-05	7.79e-05
0.257218	7.93e-05	8.01e-05	7.7e-05
0.259181	7.82e-05	7.89e-05	7.6e-05
0.261145	7.7e-05	7.76e-05	7.49e-05
0.263108	7.57e-05	7.63e-05	7.38e-05
0.265072	7.44e-05	7.49e-05	7.26e-05
0.267035	7.3e-05	7.35e-05	7.14e-05
0.268999	7.15e-05	7.2e-05	7.01e-05
0.270962	7e-05	7.05e-05	6.88e-05
0.272926	6.85e-05	6.9e-05	6.75e-05
0.274889	6.69e-05	6.74e-05	6.61e-05
0.276853	6.53e-05	6.59e-05	6.47e-05
0.278816	6.37e-05	6.43e-05	6.33e-05
0.28078	6.2e-05	6.27e-05	6.19e-05
0.282743	6.03e-05	6.11e-05	6.05e-05
0.284707	5.87e-05	5.95e-05	5.91e-05
0.28667	5.7e-05	5.79e-05	5.77e-05
0.288634	5.53e-05	5.63e-05	5.62e-05
0.290597	5.36e-05	5.47e-05	5.48e-05
0.292561	5.2e-05	5.32e-05	5.34e-05
0.294524	5.03e-05	5.16e-05	5.2e-05
0.296488	4.87e-05	5.01e-05	5.07e-05
0.298451	4.71e-05	4.87e-05	4.93e-05
0.300415	4.55e-05	4.72e-05	4.8e-05
0.302378	4.4e-05	4.58e-05	4.67e-05
0.304342	4.25e-05	4.44e-05	4.55e-05
0.306305	4.1e-05	4.31e-05	4.43e-05
0.308269	3.96e-05	4.18e-05	4.31e-05
0.310232	3.82e-05	4.06e-05	4.19e-05
0.312196	3.69e-05	3.94e-05	4.08e-05
0.314159	3.56e-05	3.82e-05	3.98e-05
0.316122	3.44e-05	3.71e-05	3.87e-05
0.318086	3.32e-05	3.61e-05	3.78e-05
0.320049	3.21e-05	3.51e-05	3.68e-05
0.322013	3.11e-05	3.41e-05	3.59e-05
0.323976	3.01e-05	3.33e-05	3.51e-05
0.32594	2.91e-05	3.24e-05	3.43e-05
0.327903	2.83e-05	3.16e-05	3.36e-05
0.329867	2.75e-05	3.09e-05	3.29e-05
0.33183	2.67e-05	3.03e-05	3.22e-05
0.333794	2.6e-05	2.97e-05	3.16e-05
0.335757	2.54e-05	2.91e-05	3.11e-05
0.337721	2.48e-05	2.86e-05	3.06e-05
0.339684	2.43e-05	2.81e-05	3.01e-05
0.341648	2.39e-05	2.77e-05	2.97e-05
0.343611	2.35e-05	2.74e-05	2.93e-05
0.345575	2.32e-05	2.71e-05	2.9e-05
0.347538	2.29e-05	2.68e-05	2.87e-05
0.349502	2.26e-05	2.66e-05	2.84e-05
0.351465	2.25e-05	2.64e-05	2.82e-05
0.353429	2.23e-05	2.62e-05	2.8e-05
0.355392	2.23e-05	2.61e-05	2.79e-05
0.357356	2.22e-05	2.6e-05	2.77e-05
0.359319	2.22e-05	2.6e-05	2.76e-05
0.361283	2.23e-05	2.59e-05	2.76e-05
0.363246	2.23e-05	2.59e-05	2.75e-05
0.36521	2.24e-05	2.6e-05	2.75e-05
0.367173	2.26e-05	2.6e-05	2.75e-05
0.369137	2.27e-05	2.6e-05	2.75e-05
0.3711	2.29e-05	2.61e-05	2.75e-05
0.373064	2.31e-05	2.61e-05	2.75e-05
0.375027	2.33e-05	2.62e-05	2.75e-05
0.376991	2.35e-05	2.63e-05	2.75e-05
0.378954	2.37e-05	2.63e-05	2.75e-05
0.380918	2.39e-05	2.64e-05	2.75e-05
0.382881	2.41e-05	2.64e-05	2.75e-05
0.384845	2.43e-05	2.64e-05	2.75e-05
0.386808	2.45e-05	2.64e-05	2.75e-05
0.388772	2.46e-05	2.64e-05	2.74e-05
0.390735	2.48e-05	2.64e-05	2.74e-05
0.392699	2.49e-05	2.63e-05	2.73e-05
0.394662	2.5e-05	2.62e-05	2.72e-05
0.396626	2.51e-05	2.61e-05	2.7e-05
0.398589	2.51e-05	2.59e-05	2.69e-05

## Sheet: DPPC_exptl
##################################################################################
## experimental scattering form factors obtained for ULV data			##
## Kucerka et al., Biochim Biophys Acta - Biomembranes 1808 (2011) 2761-2771	##
##################################################################################
##
## redefinition of scattering power for D such that water corresponds to 100% D2O
#SLwin
#set b(1) 6.67e-005
#setRHO_wat N 6.309e-006
#updateSIM
##
q	|F(q)|	deltaF
0.03022	0.00022122	5.7735e-07
0.03418	0.00021832	5.7735e-07
0.03816	0.00021396	5.7735e-07
0.04213	0.00020826	5.7735e-07
0.04611	0.00020266	5.7735e-07
0.05009	0.00019767	5.7735e-07
0.05407	0.00019259	5.7735e-07
0.05805	0.00018748	5.7735e-07
0.06202	0.00018268	5.7735e-07
0.066	0.00017724	5.7735e-07
0.06997	0.00017114	5.7735e-07
0.07395	0.00016569	5.7735e-07
0.07792	0.00016042	5.7735e-07
0.08189	0.00015323	5.7735e-07
0.08586	0.00014687	5.7735e-07
0.08982	0.00013863	5.7735e-07
0.09378	0.0001318	5.7735e-07
0.09774	0.00012503	5.7735e-07
0.1017	0.0001171	5.7735e-07
0.1057	0.00010914	5.7735e-07
0.1096	0.00010075	5.7735e-07
0.1135	9.3764e-05	5.7735e-07
0.1175	8.5859e-05	5.7735e-07
0.1214	7.8988e-05	5.7735e-07
0.1254	7.0972e-05	5.7735e-07
0.1293	6.3899e-05	5.7735e-07
0.1332	5.934e-05	5.7735e-07
0.1372	5.0834e-05	5.7735e-07
0.1411	4.6592e-05	5.7735e-07
0.145	4.0544e-05	5.7735e-07
0.1489	3.5223e-05	5.7735e-07
0.1528	3.2592e-05	5.7735e-06
0.1567	2.6162e-05	5.7735e-06
0.1606	1.887e-05	5.7735e-06
0.1645	2.0206e-05	5.7735e-06
0.1684	1.7372e-05	5.7735e-06
0.1723	1.0237e-05	5.7735e-06
0.1761	1.5675e-05	5.7735e-06
0.18	1.3275e-05	5.7735e-06
0.1839	1.4385e-05	5.7735e-06
0.1877	1.6429e-05	5.7735e-06
0.1916	1.3108e-05	5.7735e-06
0.1954	1.793e-05	5.7735e-06
0.1993	-7.349e-06	5.7735e-06
0.2031	1.272e-05	5.7735e-05
0.2069	9.981e-06	5.7735e-05
0.2108	-3.5751e-06	5.7735e-05
0.2146	-1.0235e-05	5.7735e-05
0.2184	1.7084e-05	5.7735e-05
0.2222	1.7785e-05	5.7735e-05
0.226	2.1246e-05	5.7735e-05
0.2298	6.5426e-06	5.7735e-05
0.2336	1.5847e-05	5.7735e-05
0.2373	-1.637e-05	5.7735e-05
0.2411	1.9532e-05	5.7735e-05
0.2449	-1.4223e-05	5.7735e-05
0.2486	-1.315e-05	5.7735e-05
0.2524	-2.4624e-05	5.7735e-05
0.2561	-2.1318e-05	5.7735e-05
0.2598	9.9415e-06	5.7735e-05
0.2636	-2.1055e-05	5.7735e-05
0.2673	-2.3115e-05	5.7735e-05
0.271	-1.622e-05	5.7735e-05
0.2747	-2.7847e-05	5.7735e-05
0.2784	-2.7272e-05	5.7735e-05
0.2821	-2.7822e-05	5.7735e-05
0.2857	1.6529e-05	5.7735e-05
0.2894	-3.1006e-05	5.7735e-05
0.2931	-2.8477e-05	5.7735e-05
0.2967	-1.4865e-05	5.7735e-05
