# Supplementary material for: Simulations of lipid bilayers using the CHARMM36 force field with the TIP3P-FB and TIP4P-FB water models
Source: PeerJ. 2018 Aug 14;6:e5472. doi: 10.7717/peerj.5472 (PMC6097494; doi:10.7717/peerj.5472)
Supplement: Supplemental Information 2 [file peerj-06-5472-s002.xlsx]

## Sheet: POPC_simulated
# POPC X-ray scattering profiles calculated from molecular dynamics simulations
q (A-1)	|F|
	TIP3P	TIP3P-FB	TIP4P-FB
0	0.509186	1.77169	1.26138
0.00125667	0.509648	1.76938	1.25929
0.00251334	0.511035	1.76244	1.253
0.00377001	0.513345	1.75088	1.24255
0.00502668	0.516577	1.73471	1.22795
0.00628335	0.52073	1.71394	1.20925
0.00754002	0.5258	1.68858	1.18651
0.00879669	0.531785	1.65866	1.15983
0.0100534	0.538683	1.62418	1.12932
0.01131	0.546488	1.58518	1.09518
0.0125667	0.555197	1.54168	1.0577
0.0138234	0.564806	1.49371	1.01736
0.01508	0.575309	1.44131	0.974915
0.0163367	0.586702	1.38451	0.931579
0.0175934	0.59898	1.32335	0.889091
0.01885	0.612142	1.25787	0.849302
0.0201067	0.626196	1.18811	0.813173
0.0213634	0.641307	1.11413	0.780252
0.0226201	0.683706	1.03598	0.749366
0.0238767	0.750081	0.9537	0.719424
0.0251334	0.819894	0.867359	0.689671
0.0263901	0.892983	0.777012	0.659633
0.0276467	0.969282	0.682722	0.629021
0.0289034	1.04874	0.584552	0.597657
0.0301601	1.1313	0.482572	0.565436
0.0314167	1.2169	0.376849	0.53231
0.0326734	1.3055	0.267458	0.498384
0.0339301	1.39703	0.154475	0.496682
0.0351867	1.49143	0.0503116	0.533214
0.0364434	1.58863	0.0819959	0.571115
0.0377001	1.68858	0.205279	0.610701
0.0389568	1.7912	0.331843	0.726148
0.0402134	1.89644	0.461591	0.846878
0.0414701	2.00421	0.594436	0.970519
0.0427268	2.11444	0.730284	1.09697
0.0439834	2.22707	0.869044	1.22614
0.0452401	2.34202	1.01062	1.35793
0.0464968	2.45921	1.15492	1.49225
0.0477534	2.57857	1.30183	1.629
0.0490101	2.70001	1.45127	1.76807
0.0502668	2.82346	1.60312	1.90938
0.0515234	2.94882	1.75729	2.05282
0.0527801	3.07603	1.91367	2.19829
0.0540368	3.20499	2.07215	2.34568
0.0552935	3.33561	2.23263	2.4949
0.0565501	3.46782	2.39499	2.64583
0.0578068	3.60152	2.55912	2.79838
0.0590635	3.73662	2.72491	2.95243
0.0603201	3.87304	2.89226	3.10788
0.0615768	4.01068	3.06104	3.26462
0.0628335	4.14945	3.23113	3.42255
0.0640901	4.28925	3.40244	3.58154
0.0653468	4.43001	3.57483	3.74149
0.0666035	4.57161	3.74818	3.9023
0.0678602	4.71397	3.92239	4.06384
0.0691168	4.85698	4.09734	4.22602
0.0703735	5.00057	4.2729	4.3887
0.0716302	5.14462	4.44895	4.5518
0.0728868	5.28904	4.62538	4.71518
0.0741435	5.43374	4.80206	4.87874
0.0754002	5.57861	4.97888	5.04238
0.0766568	5.72357	5.15571	5.20596
0.0779135	5.86851	5.33244	5.3694
0.0791702	6.01334	5.50894	5.53256
0.0804268	6.15795	5.6851	5.69535
0.0816835	6.30225	5.8608	5.85764
0.0829402	6.44615	6.03591	6.01934
0.0841969	6.58955	6.21032	6.18032
0.0854535	6.73234	6.38391	6.34049
0.0867102	6.87444	6.55657	6.49973
0.0879669	7.01574	6.72816	6.65794
0.0892235	7.15616	6.89859	6.815
0.0904802	7.29559	7.06773	6.97082
0.0917369	7.43394	7.23548	7.12529
0.0929935	7.57113	7.40171	7.2783
0.0942502	7.70704	7.56631	7.42975
0.0955069	7.8416	7.72917	7.57954
0.0967636	7.97471	7.89019	7.72757
0.0980202	8.10627	8.04926	7.87375
0.0992769	8.23621	8.20626	8.01797
0.100534	8.36442	8.36109	8.16014
0.10179	8.49083	8.51364	8.30016
0.103047	8.61534	8.66382	8.43795
0.104304	8.73787	8.81153	8.5734
0.10556	8.85834	8.95665	8.70644
0.106817	8.97665	9.0991	8.83697
0.108074	9.09274	9.23878	8.96491
0.10933	9.20651	9.3756	9.09018
0.110587	9.3179	9.50946	9.21269
0.111844	9.42681	9.64027	9.33236
0.1131	9.53318	9.76794	9.44912
0.114357	9.63693	9.89239	9.56288
0.115614	9.73799	10.0135	9.67358
0.11687	9.83628	10.1313	9.78115
0.118127	9.93174	10.2456	9.88551
0.119384	10.0243	10.3563	9.98659
0.12064	10.1139	10.4635	10.0843
0.121897	10.2004	10.5669	10.1787
0.123154	10.2839	10.6666	10.2696
0.12441	10.3642	10.7625	10.357
0.125667	10.4413	10.8544	10.4408
0.126924	10.5151	10.9424	10.5209
0.12818	10.5856	11.0264	10.5974
0.129437	10.6527	11.1064	10.6702
0.130694	10.7164	11.1822	10.7392
0.13195	10.7766	11.2538	10.8044
0.133207	10.8332	11.3212	10.8657
0.134464	10.8863	11.3843	10.9232
0.13572	10.9358	11.4432	10.9767
0.136977	10.9817	11.4976	11.0263
0.138234	11.0238	11.5477	11.0718
0.13949	11.0623	11.5934	11.1134
0.140747	11.0969	11.6345	11.1509
0.142004	11.1278	11.6712	11.1843
0.14326	11.1549	11.7034	11.2137
0.144517	11.1781	11.7311	11.239
0.145774	11.1974	11.7542	11.2601
0.14703	11.2129	11.7727	11.2771
0.148287	11.2244	11.7867	11.29
0.149544	11.2321	11.796	11.2987
0.1508	11.2358	11.8007	11.3033
0.152057	11.2355	11.8008	11.3038
0.153314	11.2313	11.7964	11.3001
0.15457	11.2231	11.7872	11.2922
0.155827	11.2109	11.7735	11.2802
0.157084	11.1948	11.7552	11.2641
0.15834	11.1747	11.7323	11.2439
0.159597	11.1506	11.7048	11.2195
0.160854	11.1226	11.6727	11.1911
0.16211	11.0906	11.6361	11.1586
0.163367	11.0546	11.5949	11.122
0.164624	11.0148	11.5492	11.0814
0.16588	10.971	11.4991	11.0368
0.167137	10.9233	11.4445	10.9883
0.168394	10.8717	11.3855	10.9358
0.16965	10.8162	11.3221	10.8794
0.170907	10.7569	11.2543	10.8191
0.172164	10.6938	11.1822	10.755
0.17342	10.6269	11.1059	10.687
0.174677	10.5563	11.0254	10.6153
0.175934	10.482	10.9406	10.5399
0.17719	10.4039	10.8518	10.4609
0.178447	10.3222	10.7588	10.3782
0.179704	10.237	10.6619	10.2919
0.18096	10.1481	10.561	10.2021
0.182217	10.0557	10.4562	10.1088
0.183474	9.9599	10.3475	10.0121
0.18473	9.86064	10.2351	9.91208
0.185987	9.758	10.119	9.80873
0.187244	9.65204	9.99919	9.70214
0.1885	9.54282	9.87585	9.59237
0.189757	9.43038	9.749	9.47949
0.191014	9.31479	9.61874	9.36354
0.19227	9.19611	9.48513	9.24462
0.193527	9.07439	9.34825	9.12277
0.194784	8.94971	9.20818	8.99808
0.19604	8.82213	9.065	8.8706
0.197297	8.69171	8.91881	8.74042
0.198554	8.55853	8.76967	8.6076
0.19981	8.42265	8.61769	8.47222
0.201067	8.28414	8.46294	8.33435
0.202324	8.14309	8.30552	8.19408
0.20358	7.99956	8.14552	8.05147
0.204837	7.85362	7.98303	7.9066
0.206094	7.70537	7.81815	7.75956
0.20735	7.55487	7.65097	7.61043
0.208607	7.4022	7.48158	7.45928
0.209864	7.24745	7.31009	7.30619
0.21112	7.0907	7.13658	7.15126
0.212377	6.93204	6.96117	6.99456
0.213634	6.77154	6.78395	6.83617
0.21489	6.60929	6.60503	6.67619
0.216147	6.44538	6.42449	6.51468
0.217404	6.27989	6.24245	6.35175
0.21866	6.11292	6.05901	6.18748
0.219917	5.94455	5.87427	6.02194
0.221174	5.77487	5.68834	5.85523
0.222431	5.60397	5.50131	5.68744
0.223687	5.43194	5.3133	5.51865
0.224944	5.25887	5.12441	5.34894
0.226201	5.08486	4.93474	5.17841
0.227457	4.90999	4.7444	5.00714
0.228714	4.73437	4.55349	4.83523
0.229971	4.55807	4.36212	4.66274
0.231227	4.38119	4.1704	4.48978
0.232484	4.20383	3.97842	4.31643
0.233741	4.02608	3.7863	4.14278
0.234997	3.84802	3.59413	3.96892
0.236254	3.66977	3.40202	3.79492
0.237511	3.4914	3.21008	3.62089
0.238767	3.31301	3.0184	3.4469
0.240024	3.13469	2.8271	3.27304
0.241281	2.95653	2.63626	3.0994
0.242537	2.77863	2.446	2.92607
0.243794	2.60108	2.25641	2.75312
0.245051	2.42397	2.06759	2.58066
0.246307	2.24738	1.87965	2.40876
0.247564	2.07141	1.69267	2.23752
0.248821	1.89616	1.50676	2.06702
0.250077	1.72169	1.32201	1.89736
0.251334	1.54812	1.13852	1.72864
0.252591	1.37551	0.956382	1.56096
0.253847	1.20396	0.775692	1.39443
0.255104	1.03356	0.596565	1.2292
0.256361	0.864387	0.420898	1.06541
0.257617	0.696528	0.357175	0.903313
0.258874	0.530067	0.299229	0.743246
0.260131	0.3651	0.24202	0.585834
0.261387	0.201824	0.278586	0.432383
0.262644	0.104588	0.441571	0.286102
0.263901	0.152835	0.607563	0.221074
0.265157	0.278797	0.771362	0.225875
0.266414	0.435174	0.932882	0.259495
0.267671	0.589664	1.09204	0.388278
0.268927	0.742156	1.24877	0.531887
0.270184	0.892572	1.40299	0.676006
0.271441	1.04084	1.55464	0.819322
0.272697	1.18689	1.70364	0.961264
0.273954	1.33066	1.84993	1.10152
0.275211	1.47209	1.99344	1.23989
0.276467	1.6111	2.13412	1.37623
0.277724	1.74764	2.2719	1.51044
0.278981	1.88165	2.40672	1.64243
0.280237	2.01307	2.53853	1.77212
0.281494	2.14185	2.66728	1.89944
0.282751	2.26792	2.7929	2.02433
0.284007	2.39125	2.91536	2.14674
0.285264	2.51177	3.0346	2.26661
0.286521	2.62944	3.15059	2.38389
0.287777	2.74422	3.26326	2.49853
0.289034	2.85606	3.3726	2.61049
0.290291	2.96491	3.47855	2.71973
0.291547	3.07073	3.58108	2.8262
0.292804	3.1735	3.68015	2.92987
0.294061	3.27316	3.77574	3.0307
0.295317	3.36969	3.86782	3.12865
0.296574	3.46305	3.95635	3.2237
0.297831	3.55322	4.04131	3.31581
0.299087	3.64016	4.12269	3.40496
0.300344	3.72385	4.20045	3.49111
0.301601	3.80427	4.27459	3.57425
0.302857	3.88138	4.34508	3.65434
0.304114	3.95518	4.41191	3.73136
0.305371	4.02565	4.47508	3.80531
0.306627	4.09276	4.53456	3.87615
0.307884	4.15651	4.59037	3.94387
0.309141	4.21688	4.64248	4.00846
0.310397	4.27387	4.69091	4.0699
0.311654	4.32747	4.73564	4.12819
0.312911	4.37767	4.77669	4.18331
0.314167	4.42448	4.81406	4.23525
0.315424	4.46788	4.84775	4.28402
0.316681	4.50788	4.87777	4.3296
0.317937	4.54449	4.90414	4.372
0.319194	4.57771	4.92686	4.41121
0.320451	4.60754	4.94597	4.44724
0.321707	4.634	4.96146	4.48008
0.322964	4.6571	4.97337	4.50975
0.324221	4.67686	4.9817	4.53624
0.325477	4.69327	4.9865	4.55957
0.326734	4.70638	4.98778	4.57975
0.327991	4.71619	4.98558	4.59679
0.329247	4.72272	4.97991	4.6107
0.330504	4.72601	4.97082	4.6215
0.331761	4.72607	4.95834	4.6292
0.333017	4.72293	4.9425	4.63383
0.334274	4.71661	4.92335	4.63539
0.335531	4.70716	4.90091	4.63392
0.336787	4.69461	4.87523	4.62944
0.338044	4.67898	4.84636	4.62196
0.339301	4.66031	4.81433	4.61153
0.340557	4.63864	4.77921	4.59815
0.341814	4.61401	4.74102	4.58188
0.343071	4.58646	4.69982	4.56272
0.344327	4.55603	4.65567	4.54073
0.345584	4.52276	4.60861	4.51592
0.346841	4.48671	4.55869	4.48834
0.348097	4.44791	4.50598	4.45803
0.349354	4.40642	4.45053	4.42501
0.350611	4.36228	4.3924	4.38933
0.351867	4.31554	4.33164	4.35104
0.353124	4.26626	4.26832	4.31016
0.354381	4.21449	4.2025	4.26675
0.355637	4.16028	4.13423	4.22085
0.356894	4.10368	4.06359	4.17251
0.358151	4.04477	3.99063	4.12177
0.359407	3.98358	3.91543	4.06867
0.360664	3.92019	3.83805	4.01328
0.361921	3.85464	3.75855	3.95563
0.363177	3.787	3.67701	3.89579
0.364434	3.71734	3.59349	3.8338
0.365691	3.64571	3.50806	3.76971
0.366947	3.57217	3.42079	3.70359
0.368204	3.49679	3.33176	3.63548
0.369461	3.41964	3.24103	3.56544
0.370718	3.34077	3.14868	3.49352
0.371974	3.26026	3.05478	3.4198
0.373231	3.17816	2.9594	3.34431
0.374488	3.09455	2.86261	3.26713
0.375744	3.00949	2.76449	3.18832
0.377001	2.92305	2.66511	3.10792
0.378258	2.83529	2.56455	3.02601
0.379514	2.74629	2.46287	2.94265
0.380771	2.6561	2.36016	2.8579
0.382028	2.56481	2.25649	2.77181
0.383284	2.47247	2.15193	2.68447
0.384541	2.37916	2.04655	2.59592
0.385798	2.28494	1.94044	2.50623
0.387054	2.18988	1.83366	2.41547
0.388311	2.09405	1.72628	2.3237
0.389568	1.99752	1.61839	2.231
0.390824	1.90035	1.51006	2.13741
0.392081	1.80262	1.40135	2.04302
0.393338	1.70438	1.29234	1.94789
0.394594	1.60572	1.18311	1.85207
0.395851	1.50669	1.07372	1.75566
0.397108	1.40735	0.964256	1.6587
0.398364	1.30779	0.85479	1.56127
0.399621	1.20806	0.745405	1.46344
0.400878	1.10822	0.636219	1.36528
0.402134	1.00835	0.527602	1.26687
0.403391	0.908497	0.440924	1.16828
0.404648	0.808738	0.404212	1.06959
0.405904	0.70913	0.368798	0.970886
0.407161	0.609737	0.333488	0.872269
0.408418	0.510621	0.298214	0.773848
0.409674	0.411844	0.262989	0.675762
0.410931	0.313471	0.256726	0.578194
0.412188	0.215576	0.331711	0.48142
0.413444	0.118301	0.436029	0.385896
0.414701	0.0609258	0.539601	0.29252
0.415958	0.0925918	0.642296	0.251056
0.417214	0.170943	0.744046	0.23563
0.418471	0.265676	0.844793	0.234328
0.419728	0.35969	0.94448	0.249643
0.420984	0.452884	1.04305	0.27748
0.422241	0.545199	1.14045	0.333262
0.423498	0.63658	1.23664	0.419998
0.424754	0.726977	1.33155	0.510291
0.426011	0.816343	1.42514	0.601009
0.427268	0.90463	1.51736	0.691479
0.428524	0.991792	1.60817	0.781399
0.429781	1.07779	1.69752	0.870588
0.431038	1.16257	1.78536	0.958923
0.432294	1.2461	1.87166	1.04631
0.433551	1.32834	1.95637	1.13266
0.434808	1.40925	2.03945	1.21791
0.436064	1.48879	2.12087	1.302
0.437321	1.56692	2.20059	1.38488
0.438578	1.64362	2.27857	1.46649
0.439834	1.71884	2.35478	1.54678
0.441091	1.79255	2.42918	1.62572
0.442348	1.86473	2.50176	1.70325
0.443604	1.93534	2.57247	1.77933
0.444861	2.00436	2.64129	1.85393
0.446118	2.07175	2.70819	1.92701
0.447374	2.1375	2.77315	1.99854
0.448631	2.20158	2.83615	2.06847
0.449888	2.26397	2.89716	2.13678
0.451144	2.32464	2.95616	2.20344
0.452401	2.38358	3.01314	2.26842
0.453658	2.44077	3.06808	2.33168
0.454914	2.49618	3.12096	2.39321
0.456171	2.54981	3.17177	2.45298
0.457428	2.60164	3.22049	2.51096
0.458684	2.65166	3.26712	2.56714
0.459941	2.69985	3.31165	2.62149
0.461198	2.74621	3.35406	2.67399
0.462454	2.79073	3.39436	2.72464
0.463711	2.83339	3.43253	2.7734
0.464968	2.8742	3.46857	2.82027
0.466224	2.91314	3.50249	2.86524
0.467481	2.95022	3.53428	2.90829
0.468738	2.98543	3.56393	2.94942
0.469994	3.01877	3.59147	2.9886
0.471251	3.05025	3.61687	3.02585
0.472508	3.07985	3.64017	3.06115
0.473764	3.10759	3.66135	3.0945
0.475021	3.13347	3.68042	3.12589
0.476278	3.15749	3.69741	3.15533
0.477534	3.17966	3.71231	3.18282
0.478791	3.2	3.72514	3.20835
0.480048	3.21849	3.73591	3.23192
0.481304	3.23517	3.74464	3.25356
0.482561	3.25003	3.75134	3.27325
0.483818	3.26309	3.75603	3.291
0.485074	3.27436	3.75872	3.30683
0.486331	3.28386	3.75944	3.32075
0.487588	3.2916	3.75821	3.33275
0.488844	3.2976	3.75504	3.34287
0.490101	3.30187	3.74997	3.3511
0.491358	3.30443	3.74301	3.35747
0.492614	3.30531	3.73419	3.36199
0.493871	3.30451	3.72353	3.36468
0.495128	3.30207	3.71106	3.36555
0.496384	3.298	3.69681	3.36463
0.497641	3.29233	3.68082	3.36193
0.498898	3.28507	3.66309	3.35748
0.500154	3.27626	3.64368	3.3513
0.501411	3.26592	3.6226	3.34342
0.502668	3.25407	3.5999	3.33385
0.503924	3.24073	3.57559	3.32262
0.505181	3.22595	3.54973	3.30976
0.506438	3.20973	3.52234	3.2953
0.507694	3.19212	3.49345	3.27927
0.508951	3.17314	3.46311	3.26169
0.510208	3.15282	3.43134	3.24259
0.511464	3.13118	3.39819	3.22201
0.512721	3.10827	3.36369	3.19998
0.513978	3.0841	3.32788	3.17653
0.515234	3.05872	3.2908	3.15169
0.516491	3.03215	3.25249	3.1255
0.517748	3.00442	3.21299	3.09798
0.519005	2.97557	3.17233	3.06919
0.520261	2.94563	3.13056	3.03915
0.521518	2.91463	3.08772	3.00789
0.522775	2.88261	3.04385	2.97546
0.524031	2.84959	2.99899	2.94189
0.525288	2.81562	2.95317	2.90722
0.526545	2.78073	2.90645	2.87148
0.527801	2.74494	2.85887	2.83473
0.529058	2.7083	2.81045	2.79698
0.530315	2.67085	2.76126	2.75829
0.531571	2.6326	2.71133	2.7187
0.532828	2.59361	2.66069	2.67823
0.534085	2.55389	2.60941	2.63694
0.535341	2.5135	2.5575	2.59486
0.536598	2.47246	2.50503	2.55203
0.537855	2.43081	2.45202	2.50849
0.539111	2.38857	2.39853	2.46429
0.540368	2.3458	2.34458	2.41946
0.541625	2.30252	2.29024	2.37404
0.542881	2.25876	2.23553	2.32808
0.544138	2.21456	2.18049	2.28161
0.545395	2.16996	2.12518	2.23468
0.546651	2.12498	2.06962	2.18732
0.547908	2.07967	2.01386	2.13957
0.549165	2.03405	1.95794	2.09148
0.550421	1.98816	1.9019	2.04308
0.551678	1.94203	1.84578	1.99442
0.552935	1.89569	1.78961	1.94552
0.554191	1.84918	1.73344	1.89644
0.555448	1.80253	1.67731	1.84721
0.556705	1.75577	1.62124	1.79786
0.557961	1.70893	1.56528	1.74845
0.559218	1.66204	1.50947	1.69899
0.560475	1.61514	1.45384	1.64954
0.561731	1.56825	1.39842	1.60012
0.562988	1.52141	1.34326	1.55078
0.564245	1.47463	1.28837	1.50155
0.565501	1.42796	1.23381	1.45246
0.566758	1.38142	1.1796	1.40355
0.568015	1.33504	1.12578	1.35486
0.569271	1.28885	1.07237	1.30642
0.570528	1.24287	1.01941	1.25826
0.571785	1.19713	0.966926	1.21042
0.573041	1.15165	0.91495	1.16293
0.574298	1.10647	0.863511	1.11582
0.575555	1.0616	0.812637	1.06913
0.576811	1.01708	0.762356	1.02289
0.578068	0.972918	0.712695	0.977123
0.579325	0.929146	0.663679	0.931872
0.580581	0.885786	0.615336	0.887168
0.581838	0.84286	0.567689	0.843042
0.583095	0.800389	0.520764	0.799528
0.584351	0.758393	0.474585	0.756662
0.585608	0.716895	0.429179	0.714479
0.586865	0.675913	0.384571	0.673019
0.588121	0.635467	0.340796	0.632323
0.589378	0.595575	0.297903	0.592437
0.590635	0.556255	0.256009	0.553413
0.591891	0.517525	0.215653	0.515311
0.593148	0.479401	0.183177	0.4782
0.594405	0.4419	0.165003	0.442162
0.595661	0.405037	0.149148	0.407297
0.596918	0.368826	0.133854	0.373722
0.598175	0.333283	0.11898	0.341577
0.599431	0.29842	0.10511	0.311017
0.600688	0.264252	0.10665	0.282203
0.601945	0.23079	0.115499	0.255281
0.603201	0.198048	0.124389	0.230344
0.604458	0.166037	0.149536	0.20742
0.605715	0.134772	0.180425	0.186498
0.606971	0.104275	0.210359	0.167737
0.608228	0.0746456	0.239298	0.153113
0.609485	0.0543758	0.267229	0.150193
0.610741	0.0452045	0.294143	0.153626
0.611998	0.0528693	0.320036	0.158291
0.613255	0.0617999	0.344903	0.163376
0.614511	0.0710405	0.368743	0.168675
0.615768	0.0889221	0.391551	0.174178
0.617025	0.112716	0.413329	0.180124
0.618281	0.136074	0.434075	0.187466
0.619538	0.158691	0.453791	0.198641
0.620795	0.180522	0.472477	0.214182
0.622051	0.201551	0.490136	0.231259
0.623308	0.22177	0.506771	0.248341
0.624565	0.241178	0.522386	0.264945
0.625821	0.259771	0.536985	0.280894
0.627078	0.27755	0.550574	0.296114
0.628335	0.294514	0.563158	0.310568
0.629591	0.310665	0.574745	0.324235
0.630848	0.326004	0.585342	0.337106
0.632105	0.340534	0.594956	0.349177
0.633361	0.354257	0.603597	0.360447
0.634618	0.367177	0.611273	0.370918
0.635875	0.379298	0.617995	0.380594
0.637131	0.390624	0.623773	0.389482
0.638388	0.401161	0.628619	0.397588
0.639645	0.410914	0.632544	0.404921
0.640901	0.419889	0.635561	0.41149
0.642158	0.428092	0.637682	0.417306
0.643415	0.435531	0.638922	0.42238
0.644671	0.442212	0.639292	0.426724
0.645928	0.448145	0.63881	0.430351
0.647185	0.453337	0.637488	0.433274
0.648441	0.457797	0.635343	0.435508
0.649698	0.461534	0.63239	0.437067
0.650955	0.464558	0.628646	0.437967
0.652211	0.466878	0.624127	0.438224
0.653468	0.468506	0.618851	0.437854
0.654725	0.469452	0.612834	0.436874
0.655981	0.469727	0.606095	0.435303
0.657238	0.469343	0.598652	0.433158
0.658495	0.468311	0.590523	0.430458
0.659751	0.466644	0.581727	0.427222
0.661008	0.464354	0.572283	0.42347
0.662265	0.461454	0.562211	0.419222
0.663522	0.457957	0.55153	0.414499
0.664778	0.453876	0.540259	0.409323
0.666035	0.449225	0.528419	0.403716
0.667292	0.444019	0.516031	0.397699
0.668548	0.43827	0.503114	0.391298
0.669805	0.431994	0.489689	0.384534
0.671062	0.425204	0.475777	0.377433
0.672318	0.417917	0.461399	0.37002
0.673575	0.410147	0.446575	0.36232
0.674832	0.401908	0.431327	0.354361
0.676088	0.393217	0.415676	0.346168
0.677345	0.384089	0.399643	0.33777
0.678602	0.374539	0.383249	0.329194
0.679858	0.364584	0.366515	0.320467
0.681115	0.354239	0.349463	0.311618
0.682372	0.34352	0.332114	0.302673
0.683628	0.332444	0.31449	0.293659
0.684885	0.321026	0.29661	0.284599
0.686142	0.309284	0.278497	0.275517
0.687398	0.297232	0.260171	0.266431
0.688655	0.284888	0.241654	0.257359
0.689912	0.272269	0.222967	0.248314
0.691168	0.259389	0.20413	0.239305
0.692425	0.246267	0.185164	0.230336
0.693682	0.232918	0.166092	0.221411
0.694938	0.219359	0.146937	0.212527
0.696195	0.205606	0.127739	0.203681
0.697452	0.191676	0.111922	0.194866
0.698708	0.177585	0.105418	0.186074
0.699965	0.163349	0.0989511	0.177299
0.701222	0.148984	0.092428	0.16853
0.702478	0.134508	0.0858542	0.159762
0.703735	0.119935	0.0792468	0.150987
0.704992	0.105283	0.0726458	0.1422
0.706248	0.0905674	0.0662225	0.133396
0.707505	0.0758054	0.0639095	0.124576
0.708762	0.0610157	0.0707249	0.115743
0.710018	0.0462243	0.0846146	0.106911
0.711275	0.031547	0.102508	0.0981308
0.712532	0.0228382	0.120722	0.0896917
0.713788	0.0181715	0.138867	0.0849464
0.715045	0.0151681	0.156858	0.0863755
0.716302	0.0279897	0.174655	0.0886183
0.717558	0.0425099	0.192235	0.0954793
0.718815	0.0570149	0.209579	0.106119
0.720072	0.0714406	0.226668	0.116682
0.721328	0.085763	0.243488	0.127132
0.722585	0.0999653	0.260025	0.137453
0.723842	0.114033	0.276265	0.147633
0.725098	0.127952	0.292194	0.157663
0.726355	0.14171	0.307801	0.167534
0.727612	0.155294	0.323073	0.17724
0.728868	0.168693	0.337998	0.186773
0.730125	0.181894	0.352567	0.19613
0.731382	0.194886	0.366767	0.205306
0.732638	0.207658	0.38059	0.214298
0.733895	0.2202	0.394024	0.223103
0.735152	0.2325	0.407062	0.231718
0.736408	0.24455	0.419694	0.240144
0.737665	0.256338	0.431913	0.248379
0.738922	0.267856	0.44371	0.256423
0.740178	0.279095	0.455078	0.264277
0.741435	0.290046	0.46601	0.271943
0.742692	0.3007	0.4765	0.279422
0.743948	0.311051	0.486542	0.286716
0.745205	0.321089	0.49613	0.293829
0.746462	0.330808	0.505259	0.300761
0.747718	0.340201	0.513925	0.307518
0.748975	0.349261	0.522124	0.314101
0.750232	0.357983	0.529851	0.320514
0.751488	0.366359	0.537104	0.326759
0.752745	0.374386	0.543881	0.332841
0.754002	0.382058	0.550178	0.338761
0.755258	0.38937	0.555994	0.344521
0.756515	0.396318	0.561327	0.350123
0.757772	0.402898	0.566177	0.355569
0.759028	0.409106	0.570542	0.360858
0.760285	0.41494	0.574424	0.36599
0.761542	0.420397	0.577821	0.370966
0.762798	0.425474	0.580735	0.375782
0.764055	0.430169	0.583167	0.380438
0.765312	0.43448	0.585119	0.38493
0.766568	0.438407	0.586592	0.389254
0.767825	0.441948	0.58759	0.393407
0.769082	0.445103	0.588113	0.397384
0.770338	0.447872	0.588167	0.401181
0.771595	0.450254	0.587754	0.404791
0.772852	0.452251	0.586878	0.408209
0.774108	0.453863	0.585543	0.41143
0.775365	0.455092	0.583755	0.414448
0.776622	0.455938	0.581517	0.417256
0.777878	0.456405	0.578836	0.419848
0.779135	0.456494	0.575717	0.42222
0.780392	0.456209	0.572167	0.424364
0.781648	0.455551	0.56819	0.426275
0.782905	0.454524	0.563795	0.427949
0.784162	0.453132	0.558987	0.429379
0.785418	0.451379	0.553774	0.43056
0.786675	0.449269	0.548165	0.431489
0.787932	0.446807	0.542165	0.432161
0.789188	0.443996	0.535784	0.432571
0.790445	0.440843	0.52903	0.432716
0.791702	0.437352	0.521911	0.432593
0.792958	0.43353	0.514436	0.432199
0.794215	0.429382	0.506614	0.431531
0.795472	0.424915	0.498455	0.430587
0.796728	0.420134	0.489967	0.429365
0.797985	0.415047	0.481161	0.427863
0.799242	0.40966	0.472046	0.426081
0.800498	0.40398	0.462633	0.424018
0.801755	0.398015	0.452931	0.421672
0.803012	0.391772	0.442951	0.419045
0.804268	0.385259	0.432704	0.416137
0.805525	0.378484	0.422199	0.412947
0.806782	0.371455	0.411449	0.409477
0.808038	0.36418	0.400463	0.405729
0.809295	0.356668	0.389253	0.401704
0.810552	0.348926	0.37783	0.397404
0.811809	0.340965	0.366205	0.392831
0.813065	0.332792	0.35439	0.387988
0.814322	0.324417	0.342395	0.382878
0.815579	0.315849	0.330232	0.377505
0.816835	0.307097	0.317913	0.371871
0.818092	0.29817	0.305449	0.365981
0.819349	0.289077	0.292852	0.35984
0.820605	0.279829	0.280133	0.35345
0.821862	0.270434	0.267305	0.346818
0.823119	0.260902	0.254377	0.339948
0.824375	0.251243	0.241363	0.332845
0.825632	0.241466	0.228273	0.325516
0.826889	0.231581	0.215119	0.317966
0.828145	0.221598	0.201913	0.310201
0.829402	0.211527	0.188666	0.302228
0.830659	0.201376	0.17539	0.294053
0.831915	0.191156	0.162096	0.285683
0.833172	0.180877	0.148796	0.277126
0.834429	0.170548	0.135501	0.268388
0.835685	0.160178	0.122222	0.259478
0.836942	0.149778	0.108972	0.250403
0.838199	0.139357	0.0957667	0.241172
0.839455	0.128924	0.082655	0.231792
0.840712	0.118489	0.0734009	0.222274
0.841969	0.10806	0.0680561	0.212625
0.843225	0.0976481	0.0627301	0.202857
0.844482	0.0872614	0.0573885	0.192977
0.845739	0.0769091	0.0520341	0.182998
0.846995	0.0666004	0.0466796	0.17293
0.848252	0.0563443	0.0413955	0.162786
0.849509	0.0461499	0.0404871	0.15258
0.850765	0.036027	0.0439539	0.142331
0.852022	0.0259878	0.0479866	0.132063
0.853279	0.016065	0.0568635	0.121818
0.854535	0.00932427	0.068351	0.111693
0.855792	0.0100969	0.0798893	0.102022
0.857049	0.0139049	0.0912936	0.0942641
0.858305	0.0229341	0.102525	0.0897812
0.859562	0.0323284	0.113566	0.0865585
0.860819	0.0416074	0.124404	0.0836534
0.862075	0.0507524	0.13503	0.0808962
0.863332	0.0597539	0.145436	0.0782808
0.864589	0.0686044	0.155613	0.0758671
0.865845	0.0772971	0.165555	0.0737789
0.867102	0.0858254	0.175255	0.072232
0.868359	0.0941832	0.184705	0.0715469
0.869615	0.102365	0.193899	0.0720391
0.870872	0.110364	0.202832	0.0738027
0.872129	0.118176	0.211497	0.0767365
0.873385	0.125794	0.21989	0.0807495
0.874642	0.133216	0.228004	0.085799
0.875899	0.140435	0.235835	0.0918136
0.877155	0.147446	0.243378	0.0986484
0.878412	0.154247	0.250629	0.106112
0.879669	0.160832	0.257583	0.114015
0.880925	0.167199	0.264236	0.122198
0.882182	0.173342	0.270585	0.130542
0.883439	0.17926	0.276627	0.138956
0.884695	0.184948	0.282358	0.147375
0.885952	0.190404	0.287776	0.155751
0.887209	0.195626	0.292877	0.164046
0.888465	0.20061	0.29766	0.172232
0.889722	0.205355	0.302122	0.180286
0.890979	0.209859	0.306263	0.188188
0.892235	0.21412	0.310079	0.195923
0.893492	0.218136	0.31357	0.203477
0.894749	0.221907	0.316735	0.210837
0.896005	0.225431	0.319573	0.217994
0.897262	0.228707	0.322083	0.224937
0.898519	0.231735	0.324267	0.231657
0.899775	0.234514	0.326122	0.238147
0.901032	0.237045	0.327651	0.2444
0.902289	0.239327	0.328852	0.250408
0.903545	0.241361	0.329728	0.256165
0.904802	0.243147	0.330279	0.261666
0.906059	0.244686	0.330507	0.266904
0.907315	0.245978	0.330412	0.271875
0.908572	0.247025	0.329997	0.276575
0.909829	0.247828	0.329264	0.280998
0.911085	0.248389	0.328215	0.285141
0.912342	0.248709	0.326853	0.289
0.913599	0.24879	0.325179	0.292573
0.914855	0.248633	0.323198	0.295855
0.916112	0.248242	0.320912	0.298845
0.917369	0.247619	0.318325	0.30154
0.918625	0.246766	0.31544	0.303937
0.919882	0.245685	0.312261	0.306036
0.921139	0.244381	0.308792	0.307835
0.922395	0.242855	0.305037	0.309333
0.923652	0.24111	0.301001	0.310528
0.924909	0.239151	0.296688	0.311421
0.926165	0.23698	0.292104	0.312012
0.927422	0.234601	0.287252	0.312299
0.928679	0.232018	0.282139	0.312285
0.929935	0.229234	0.27677	0.311969
0.931192	0.226254	0.271151	0.311352
0.932449	0.223081	0.265287	0.310437
0.933705	0.21972	0.259185	0.309224
0.934962	0.216174	0.252851	0.307715
0.936219	0.212449	0.246292	0.305913
0.937475	0.208547	0.239516	0.303819
0.938732	0.204475	0.232529	0.301438
0.939989	0.200236	0.225343	0.298772
0.941245	0.195836	0.217965	0.295824
0.942502	0.191278	0.210408	0.292598
0.943759	0.186568	0.202689	0.289099
0.945015	0.18171	0.194828	0.285329
0.946272	0.176709	0.186863	0.281295
0.947529	0.171571	0.178859	0.277001
0.948785	0.166299	0.17096	0.272451
0.950042	0.1609	0.16351	0.267653
0.951299	0.155378	0.157211	0.262611
0.952555	0.149738	0.152539	0.257332
0.953812	0.143985	0.148945	0.251822
0.955069	0.138125	0.145787	0.246089
0.956325	0.132162	0.142772	0.240139
0.957582	0.126102	0.139784	0.23398
0.958839	0.119949	0.13677	0.227622
0.960096	0.113709	0.133707	0.221071
0.961352	0.107388	0.130585	0.214338
0.962609	0.100989	0.127398	0.207433
0.963866	0.0945193	0.124144	0.200365
0.965122	0.0879827	0.120825	0.193146
0.966379	0.0813849	0.117441	0.185788
0.967636	0.074731	0.113998	0.178304
0.968892	0.0680262	0.1105	0.170709
0.970149	0.0612761	0.106955	0.163018
0.971406	0.0544861	0.103377	0.155249
0.972662	0.0476621	0.099783	0.147421
0.973919	0.0408105	0.0962073	0.139557
0.975176	0.033939	0.0927126	0.131682
0.976432	0.0270577	0.0894331	0.123829
0.977689	0.0201837	0.0866783	0.116034
0.978946	0.0133577	0.0850942	0.108346
0.980202	0.00680442	0.085432	0.100833
0.981459	0.00589202	0.0904588	0.0936006
0.982716	0.0096714	0.0995616	0.0868341
0.983972	0.0156418	0.10916	0.0809067
0.985229	0.0223182	0.118912	0.076452
0.986486	0.0291419	0.128713	0.0738582
0.987742	0.0360032	0.138514	0.0727344
0.988999	0.042868	0.148284	0.0725887
0.990256	0.0497209	0.158005	0.0731893
0.991512	0.0565525	0.167663	0.0744592
0.992769	0.0633563	0.177245	0.0763956
0.994026	0.0701267	0.186743	0.0790602
0.995282	0.0768591	0.196148	0.0826139
0.996539	0.0835491	0.205451	0.0872947
0.997796	0.0901926	0.214647	0.0931481
0.999052	0.0967858	0.223728	0.0998909

## Sheet: POPC_exptl_ORI
##################################################################################
## experimental X-ray scattering form factors obtained for ORIented data
## Kucerka et al., Journal of Membrane Biology 208-3 (2006) 193-202
##################################################################################
q	|F(q)|	deltaF
0.20499	1.4203	0.05
0.20602	1.4357	0.05
0.20706	1.4365	0.05
0.20809	1.4351	0.05
0.20913	1.426	0.05
0.21017	1.4065	0.05
0.2112	1.3611	0.05
0.21224	1.3227	0.05
0.21327	1.3335	0.05
0.21431	1.3289	0.05
0.21534	1.3129	0.05
0.21638	1.2817	0.05
0.21741	1.2461	0.05
0.21845	1.2443	0.05
0.21948	1.2501	0.05
0.22052	1.2298	0.05
0.22155	1.2162	0.05
0.22259	1.1989	0.05
0.22362	1.1792	0.05
0.22466	1.1134	0.05
0.22569	1.0522	0.05
0.22673	1.0325	0.05
0.22776	1.0279	0.05
0.22879	1.0175	0.05
0.22983	0.99218	0.05
0.23086	0.96373	0.05
0.2319	0.95354	0.05
0.23293	0.93903	0.05
0.23396	0.90204	0.05
0.235	0.87179	0.05
0.23603	0.82464	0.05
0.23707	0.81328	0.05
0.2381	0.77465	0.05
0.23913	0.74044	0.05
0.24017	0.74548	0.05
0.2412	0.72483	0.05
0.24223	0.70645	0.05
0.24327	0.67346	0.05
0.2443	0.66393	0.05
0.24534	0.64323	0.05
0.24637	0.59616	0.05
0.2474	0.57323	0.05
0.24843	0.55363	0.05
0.24947	0.53792	0.05
0.2505	0.52103	0.05
0.25153	0.47321	0.05
0.25257	0.43892	0.05
0.2536	0.42693	0.05
0.25463	0.40957	0.05
0.25567	0.3967	0.05
0.2567	0.41177	0.05
0.25773	0.3577	0.05
0.25876	0.3519	0.05
0.2598	0.34827	0.05
0.26083	0.3083	0.05
0.26186	0.23677	0.05
0.26289	0.2282	0.05
0.26393	0.18624	0.05
0.26496	0.18577	0.05
0.26599	0.20202	0.05
0.26702	0.19455	0.05
0.26806	0.1414	0.05
0.26909	0.01113	0.05
0.27012	0.05436	0.05
0.27115	0.11766	0.05
0.27218	0.09977	0.05
0.27322	0.07346	0.05
0.27425	-0.02047	0.05
0.27528	-0.01843	0.05
0.27631	-0.07355	0.05
0.27734	0.02224	0.05
0.27838	0.11513	0.05
0.27941	0.12023	0.05
0.28044	0.12195	0.05
0.28147	0.16919	0.05
0.2825	0.19506	0.05
0.28353	0.16352	0.05
0.28457	0.17786	0.05
0.2856	0.18884	0.05
0.28663	0.23277	0.05
0.28766	0.28423	0.05
0.28869	0.29139	0.05
0.28972	0.26795	0.05
0.29075	0.28524	0.05
0.29178	0.30299	0.05
0.29282	0.34764	0.05
0.29385	0.36952	0.05
0.29488	0.37287	0.05
0.29591	0.38892	0.05
0.29694	0.41697	0.05
0.29797	0.42814	0.05
0.299	0.44583	0.05
0.30003	0.46658	0.05
0.30106	0.48119	0.05
0.30209	0.49228	0.05
0.30312	0.51064	0.05
0.30415	0.53942	0.05
0.30519	0.54203	0.05
0.30622	0.54957	0.05
0.30725	0.56442	0.05
0.30828	0.57899	0.05
0.30931	0.59143	0.05
0.31034	0.60662	0.05
0.31137	0.60914	0.05
0.3124	0.62296	0.05
0.31343	0.64732	0.05
0.31446	0.66153	0.05
0.31549	0.66542	0.05
0.31652	0.66842	0.05
0.31755	0.67433	0.05
0.31858	0.68287	0.05
0.31961	0.68888	0.05
0.32064	0.70413	0.05
0.32167	0.71193	0.05
0.3227	0.71689	0.05
0.32373	0.71465	0.05
0.32476	0.7183	0.05
0.32579	0.74416	0.05
0.32682	0.74385	0.05
0.32785	0.74254	0.05
0.32888	0.73396	0.05
0.32991	0.73089	0.05
0.33094	0.75205	0.05
0.33197	0.76436	0.05
0.333	0.75133	0.05
0.33402	0.7432	0.05
0.33505	0.75813	0.05
0.33608	0.7725	0.05
0.33711	0.77206	0.05
0.33814	0.76236	0.05
0.33917	0.7484	0.05
0.3402	0.74317	0.05
0.34123	0.7407	0.05
0.34226	0.74828	0.05
0.34329	0.75311	0.05
0.34432	0.74132	0.05
0.34535	0.73691	0.05
0.34637	0.7445	0.05
0.3474	0.73072	0.05
0.34843	0.72727	0.05
0.34946	0.71741	0.05
0.35049	0.69186	0.05
0.35152	0.67561	0.05
0.35255	0.68676	0.05
0.35358	0.69054	0.05
0.3546	0.68815	0.05
0.35563	0.69094	0.05
0.35666	0.69031	0.05
0.35769	0.66462	0.05
0.35872	0.64778	0.05
0.35975	0.64766	0.05
0.36077	0.63426	0.05
0.3618	0.61581	0.05
0.36283	0.5951	0.05
0.36386	0.59141	0.05
0.36489	0.58624	0.05
0.36592	0.57565	0.05
0.36694	0.56886	0.05
0.36797	0.58336	0.05
0.369	0.58404	0.05
0.37003	0.56023	0.05
0.37106	0.53831	0.05
0.37208	0.53654	0.05
0.37311	0.53018	0.05
0.37414	0.53509	0.05
0.37517	0.52294	0.05
0.3762	0.51321	0.05
0.37722	0.5094	0.05
0.37825	0.52631	0.05
0.37928	0.52219	0.05
0.38031	0.49239	0.05
0.38133	0.48936	0.05
0.38236	0.48541	0.05
0.38339	0.47755	0.05
0.38442	0.45671	0.05
0.38544	0.44373	0.05
0.38647	0.4449	0.05
0.3875	0.43285	0.05
0.38853	0.42326	0.05
0.38955	0.42855	0.05
0.39058	0.42819	0.05
0.39161	0.42229	0.05
0.39263	0.41169	0.05
0.39366	0.40322	0.05
0.39469	0.39773	0.05
0.39572	0.3963	0.05
0.39674	0.38669	0.05
0.39777	0.37113	0.05
0.3988	0.35744	0.05
0.39982	0.34976	0.05
0.40085	0.35617	0.05
0.40188	0.34892	0.05
0.4029	0.33662	0.05
0.40393	0.32283	0.05
0.40496	0.31235	0.05
0.40598	0.30526	0.05
0.40701	0.29218	0.05
0.40804	0.28771	0.05
0.40906	0.28928	0.05
0.41009	0.27155	0.05
0.41111	0.25296	0.05
0.41214	0.257	0.05
0.41317	0.25822	0.05
0.41419	0.24508	0.05
0.41522	0.23188	0.05
0.41625	0.21171	0.05
0.41727	0.1899	0.05
0.4183	0.15715	0.05
0.41933	0.13316	0.05
0.42035	0.1464	0.05
0.42138	0.136	0.05
0.4224	0.11202	0.05
0.42343	0.13324	0.05
0.42445	0.15243	0.05
0.42548	0.10941	0.05
0.42651	-0.01598	0.05
0.42753	0.06747	0.05
0.42856	0.01148	0.05
0.42958	0.05233	0.05
0.43061	0.07335	0.05
0.43163	0.12225	0.05
0.43266	0.14817	0.05
0.43369	0.12983	0.05
0.43471	0.13607	0.05
0.43574	0.10444	0.05
0.43676	0.08568	0.05
0.43779	0.14711	0.05
0.43881	0.13077	0.05
0.43984	0.10935	0.05
0.44086	0.10801	0.05
0.44189	0.153	0.05
0.44291	0.14039	0.05
0.44394	0.13633	0.05
0.44496	0.16887	0.05
0.44599	0.14062	0.05
0.44701	0.15431	0.05
0.44804	0.20336	0.05
0.44906	0.198	0.05
0.45009	0.2126	0.05
0.45111	0.21329	0.05
0.45214	0.21832	0.05
0.45316	0.22779	0.05
0.45419	0.2344	0.05
0.45521	0.22251	0.05
0.45623	0.20567	0.05
0.45726	0.23076	0.05
0.45828	0.24767	0.05
0.45931	0.245	0.05
0.46033	0.2507	0.05
0.46136	0.26135	0.05
0.46238	0.288	0.05
0.46341	0.30496	0.05
0.46443	0.3114	0.05
0.46545	0.30766	0.05
0.46648	0.30422	0.05
0.4675	0.2944	0.05
0.46853	0.29757	0.05
0.46955	0.30379	0.05
0.47057	0.29715	0.05
0.4716	0.29977	0.05
0.47262	0.31121	0.05
0.47365	0.31579	0.05
0.47467	0.31974	0.05
0.47569	0.34636	0.05
0.47672	0.37066	0.05
0.47774	0.36479	0.05
0.47877	0.36159	0.05
0.47979	0.36071	0.05
0.48081	0.35595	0.05
0.48184	0.36323	0.05
0.48286	0.38521	0.05
0.48388	0.39453	0.05
0.48491	0.39452	0.05
0.48593	0.38661	0.05
0.48695	0.38192	0.05
0.48798	0.39005	0.05
0.489	0.41651	0.05
0.49002	0.42044	0.05
0.49104	0.42537	0.05
0.49207	0.42189	0.05
0.49309	0.41975	0.05
0.49411	0.42449	0.05
0.49514	0.44402	0.05
0.49616	0.43947	0.05
0.49718	0.42439	0.05
0.49821	0.44343	0.05
0.49923	0.45703	0.05
0.50025	0.45369	0.05
0.50127	0.46223	0.05
0.5023	0.47636	0.05
0.50332	0.49068	0.05
0.50434	0.49389	0.05
0.50536	0.49207	0.05
0.50639	0.4959	0.05
0.50741	0.51954	0.05
0.50843	0.51346	0.05
0.50945	0.51228	0.05
0.51048	0.51455	0.05
0.5115	0.51818	0.05
0.51252	0.51587	0.05
0.51354	0.51148	0.05
0.51456	0.52004	0.05
0.51559	0.52784	0.05
0.51661	0.52715	0.05
0.51763	0.53249	0.05
0.51865	0.54498	0.05
0.51967	0.53821	0.05
0.5207	0.54117	0.05
0.52172	0.5403	0.05
0.52274	0.53835	0.05
0.52376	0.54077	0.05
0.52478	0.52736	0.05
0.5258	0.52167	0.05
0.52682	0.51436	0.05
0.52785	0.50958	0.05
0.52887	0.51129	0.05
0.52989	0.5036	0.05
0.53091	0.5007	0.05
0.53193	0.51429	0.05
0.53295	0.51781	0.05
0.53397	0.50655	0.05
0.535	0.50209	0.05
0.53602	0.50128	0.05
0.53704	0.49553	0.05
0.53806	0.48901	0.05
0.53908	0.48009	0.05
0.5401	0.45899	0.05
0.54112	0.45223	0.05
0.54214	0.45031	0.05
0.54316	0.44608	0.05
0.54418	0.44485	0.05
0.5452	0.43975	0.05
0.54623	0.43059	0.05
0.54725	0.41533	0.05
0.54827	0.41649	0.05
0.54929	0.43925	0.05
0.55031	0.44554	0.05
0.55133	0.42285	0.05
0.55235	0.40516	0.05
0.55337	0.39494	0.05
0.55439	0.38575	0.05
0.55541	0.37469	0.05
0.55643	0.37408	0.05
0.55745	0.35569	0.05
0.55847	0.31961	0.05
0.55949	0.31876	0.05
0.56051	0.33808	0.05
0.56153	0.33031	0.05
0.56255	0.30518	0.05
0.56357	0.28538	0.05
0.56459	0.28852	0.05
0.56561	0.29554	0.05
0.56663	0.2996	0.05
0.56765	0.2689	0.05
0.56867	0.26212	0.05
0.56969	0.26279	0.05
0.57071	0.26326	0.05
0.57173	0.23553	0.05
0.57275	0.24365	0.05
0.57377	0.23582	0.05
0.57478	0.23635	0.05
0.5758	0.24381	0.05
0.57682	0.25048	0.05
0.57784	0.22068	0.05
0.57886	0.21705	0.05
0.57988	0.21499	0.05
0.5809	0.21927	0.05
0.58192	0.18715	0.05
0.58294	0.1683	0.05
0.58396	0.19904	0.05
0.58498	0.17795	0.05
0.58599	0.16627	0.05
0.58701	0.16209	0.05
0.58803	0.19661	0.05
0.58905	0.2029	0.05
0.59007	0.18598	0.05
0.59109	0.15228	0.05
0.59211	0.15101	0.05
0.59312	0.1833	0.05
0.59414	0.20089	0.05
0.59516	0.19445	0.05
0.59618	0.18916	0.05
0.5972	0.14595	0.05
0.59822	0.0774	0.05
0.59923	0.09612	0.05
0.60025	0.14523	0.05
0.60127	0.15218	0.05
0.60229	0.12508	0.05
0.60331	0.06147	0.05
0.60432	-0.07186	0.05
0.60534	-0.10533	0.05
0.60636	-0.1149	0.05
0.60738	-0.04732	0.05
0.6084	0.11134	0.05
0.60941	0.10423	0.05
0.61043	0.09333	0.05
0.61145	0.10797	0.05
0.61247	0.08919	0.05
0.61348	0.05473	0.05
0.6145	-0.06787	0.05
0.61552	-0.07677	0.05
0.61653	-0.05371	0.05
0.61755	0.03605	0.05
0.61857	0.06663	0.05
0.61959	0.06769	0.05
0.6206	0.08443	0.05
0.62162	-0.03651	0.05
0.62264	0.05168	0.05
0.62365	0.10151	0.05
0.62467	0.01497	0.05
0.62569	-0.07951	0.05
0.6267	-0.07392	0.05
0.62772	0.08001	0.05
0.62874	0.08227	0.05
0.62975	0.07659	0.05
0.63077	0.07283	0.05
0.63179	0.06351	0.05
0.6328	0.04028	0.05
0.63382	0.04668	0.05
0.63484	-0.01844	0.05
0.63585	-0.04064	0.05
0.63687	-0.04015	0.05
0.63788	-0.02441	0.05
0.6389	-0.02894	0.05
0.63992	-0.06227	0.05
0.64093	0.02188	0.05
0.64195	0.06425	0.05
0.64297	0.04198	0.05
0.64398	-0.00762	0.05
0.645	-0.05283	0.05
0.64601	-0.03545	0.05
0.64703	0.0608	0.05
0.64804	0.08878	0.05
0.64906	0.06588	0.05
0.65008	0.04316	0.05
0.65109	0.05419	0.05
0.65211	0.0245	0.05
0.65312	0.0321	0.05
0.65414	0.0512	0.05
0.65515	0.05356	0.05
0.65617	0.02952	0.05
0.65718	0.01327	0.05
0.6582	0.03546	0.05
0.65921	0.04479	0.05
0.66023	0.08046	0.05
0.66124	0.05483	0.05
0.66226	0.01375	0.05
0.66327	-0.0194	0.05
0.66429	0.05536	0.05
0.6653	0.02821	0.05
0.66632	0.03662	0.05
0.66733	0.06773	0.05
0.66835	0.03499	0.05
0.66936	-0.0844	0.05
0.67038	-0.07645	0.05
0.67139	-0.0576	0.05
0.6724	-0.08899	0.05
0.67342	-0.07409	0.05
0.67443	-0.0377	0.05
0.67545	0.07766	0.05
0.67646	0.07096	0.05
0.67747	0.03639	0.05
0.67849	0.02528	0.05
0.6795	-0.03398	0.05
0.68052	0.04922	0.05
0.68153	0.07313	0.05
0.68254	0.04065	0.05
0.68356	0.0307	0.05
0.68457	0.07466	0.05
0.68559	0.08456	0.05
0.6866	0.06638	0.05
0.68761	-0.03637	0.05
0.68863	-0.05722	0.05
0.68964	-0.04138	0.05
0.69065	-0.03874	0.05
0.69167	-0.07303	0.05
0.69268	-0.07834	0.05
0.69369	-0.05233	0.05
0.69471	-0.01549	0.05
0.69572	0.0365	0.05
0.69673	0.04744	0.05
0.69774	-0.03843	0.05
0.69876	-0.01938	0.05
0.69977	-0.05909	0.05
0.70078	-0.05291	0.05
0.7018	-0.03025	0.05
0.70281	-0.07815	0.05
0.70382	-0.08551	0.05
0.70483	-0.05975	0.05
0.70585	-0.04064	0.05
0.70686	-0.05908	0.05
0.70787	-0.05898	0.05
0.70888	0.03535	0.05
0.7099	0.01491	0.05
0.71091	-0.05956	0.05
0.71192	-0.0759	0.05
0.71293	-0.07437	0.05
0.71394	-0.08527	0.05
0.71496	-0.08063	0.05
0.71597	-0.09804	0.05
0.71698	-0.07079	0.05
0.71799	0.0041	0.05
0.719	0.07016	0.05
0.72002	0.06586	0.05
0.72103	0.03564	0.05
0.72204	-0.04094	0.05
0.72305	-0.03762	0.05
0.72406	0.00133	0.05
0.72507	-0.03762	0.05
0.72608	-0.06865	0.05
0.7271	-0.0776	0.05
0.72811	-0.05735	0.05
0.72912	0.02616	0.05
0.73013	0.05375	0.05
0.73114	0.07654	0.05
0.73215	0.06564	0.05
0.73316	0.04301	0.05
0.73417	0.02643	0.05
0.73518	0.03841	0.05
0.73619	0.06374	0.05
0.73721	0.03483	0.05
0.73822	-0.02079	0.05
0.73923	0.06061	0.05
0.74024	0.02312	0.05
0.74125	-0.03593	0.05
0.74226	0.02822	0.05
0.74327	0.02015	0.05
0.74428	-0.06052	0.05
0.74529	-0.08156	0.05
0.7463	-0.09264	0.05
0.74731	-0.05894	0.05
0.74832	0.03505	0.05
0.74933	0.06044	0.05
0.75034	0.08358	0.05
0.75135	0.07803	0.05
0.75236	0.05113	0.05
0.75337	0.03455	0.05
0.75438	0.04695	0.05
0.75539	0.02668	0.05
0.7564	-0.04149	0.05
0.75741	-0.02008	0.05
0.75842	0.01149	0.05
0.75943	0.04045	0.05
0.76044	0.03969	0.05
0.76144	0.07207	0.05
0.76245	0.09241	0.05
0.76346	0.09625	0.05
0.76447	0.05376	0.05
0.76548	-0.05326	0.05
0.76649	-0.03329	0.05
0.7675	0.06457	0.05
0.76851	0.07664	0.05
0.76952	0.07055	0.05
0.77052	0.05817	0.05
0.77153	-0.06356	0.05
0.77254	-0.07975	0.05
0.77355	-0.06575	0.05
0.77456	0.03512	0.05
0.77557	0.084	0.05
0.77658	0.07081	0.05
0.77758	0.03537	0.05
0.77859	0.06635	0.05
0.7796	0.04972	0.05
0.78061	0.02851	0.05
0.78162	-0.05048	0.05
0.78262	0.06351	0.05
0.78363	0.08049	0.05
0.78464	0.02579	0.05
0.78565	0.03848	0.05
0.78666	0.00576	0.05
0.78766	-0.05072	0.05
0.78867	-0.04792	0.05
0.78968	0.04281	0.05
0.79069	0.04406	0.05
0.79169	0.05415	0.05
0.7927	0.05625	0.05
0.79371	0.07112	0.05
0.79472	-0.02145	0.05
0.79572	0.04945	0.05
0.79673	0.05082	0.05
0.79774	-0.04891	0.05
0.79874	0.02853	0.05
0.79975	0.07148	0.05

## Sheet: POPC_exptl_ULV
##################################################################################
## experimental scattering form factors obtained for ULV data
## Kucerka et al., Biochim Biophys Acta - Biomembranes 1808 (2011) 2761-2771
##################################################################################
##
## redefinition of scattering power for D such that water corresponds to 0% D2O
#SLwin
#set e(1) 1.0
#setRHO_wat X 0.333
#updateSIM
##
q |F(q)| deltaF
6.0700e-002 6.8710e-001 6.0000e-002
6.1580e-002 7.0880e-001 6.0000e-002
6.2460e-002 7.3419e-001 6.0000e-002
6.3340e-002 7.5575e-001 6.0000e-002
6.4220e-002 7.7050e-001 6.0000e-002
6.5100e-002 7.9154e-001 6.0000e-002
6.5980e-002 8.1583e-001 6.0000e-002
6.6860e-002 8.3382e-001 6.0000e-002
6.7740e-002 8.5754e-001 6.0000e-002
6.8620e-002 8.7708e-001 6.0000e-002
6.9500e-002 8.9350e-001 6.0000e-002
7.0380e-002 9.1391e-001 6.0000e-002
7.1260e-002 9.2888e-001 6.0000e-002
7.2140e-002 9.5103e-001 6.0000e-002
7.3020e-002 9.7416e-001 6.0000e-002
7.3900e-002 9.9737e-001 6.0000e-002
7.4780e-002 1.0159e+000 6.0000e-002
7.5660e-002 1.0336e+000 6.0000e-002
7.6540e-002 1.0544e+000 6.0000e-002
7.7410e-002 1.0763e+000 6.0000e-002
7.8300e-002 1.0970e+000 6.0000e-002
7.9170e-002 1.1182e+000 6.0000e-002
8.0050e-002 1.1379e+000 6.0000e-002
8.0930e-002 1.1587e+000 6.0000e-002
8.1810e-002 1.1811e+000 6.0000e-002
8.2690e-002 1.1996e+000 6.0000e-002
8.3570e-002 1.2217e+000 6.0000e-002
8.4450e-002 1.2398e+000 6.0000e-002
8.5330e-002 1.2565e+000 6.0000e-002
8.6210e-002 1.2756e+000 6.0000e-002
8.7090e-002 1.2954e+000 6.0000e-002
8.7970e-002 1.3158e+000 6.0000e-002
8.8850e-002 1.3356e+000 6.0000e-002
8.9730e-002 1.3561e+000 6.0000e-002
9.0610e-002 1.3733e+000 6.0000e-002
9.1490e-002 1.3891e+000 6.0000e-002
9.2370e-002 1.4072e+000 6.0000e-002
9.3250e-002 1.4293e+000 6.0000e-002
9.4130e-002 1.4495e+000 6.0000e-002
9.5010e-002 1.4657e+000 6.0000e-002
9.5880e-002 1.4814e+000 6.0000e-002
9.6770e-002 1.4972e+000 6.0000e-002
9.7640e-002 1.5145e+000 6.0000e-002
9.8520e-002 1.5328e+000 6.0000e-002
9.9400e-002 1.5492e+000 6.0000e-002
1.0028e-001 1.5677e+000 6.0000e-002
1.0116e-001 1.5836e+000 6.0000e-002
1.0204e-001 1.5967e+000 6.0000e-002
1.0292e-001 1.6116e+000 6.0000e-002
1.0380e-001 1.6282e+000 6.0000e-002
1.0468e-001 1.6433e+000 6.0000e-002
1.0556e-001 1.6600e+000 6.0000e-002
1.0644e-001 1.6741e+000 6.0000e-002
1.0732e-001 1.6871e+000 6.0000e-002
1.0820e-001 1.7017e+000 6.0000e-002
1.0908e-001 1.7194e+000 6.0000e-002
1.0996e-001 1.7309e+000 6.0000e-002
1.1084e-001 1.7454e+000 6.0000e-002
1.1171e-001 1.7557e+000 6.0000e-002
1.1259e-001 1.7680e+000 6.0000e-002
1.1347e-001 1.7793e+000 6.0000e-002
1.1435e-001 1.7923e+000 6.0000e-002
1.1523e-001 1.8061e+000 6.0000e-002
1.1611e-001 1.8174e+000 6.0000e-002
1.1699e-001 1.8264e+000 6.0000e-002
1.1787e-001 1.8368e+000 6.0000e-002
1.1875e-001 1.8499e+000 6.0000e-002
1.1963e-001 1.8605e+000 6.0000e-002
1.2051e-001 1.8723e+000 6.0000e-002
1.2139e-001 1.8836e+000 6.0000e-002
1.2227e-001 1.8924e+000 6.0000e-002
1.2315e-001 1.8988e+000 6.0000e-002
1.2403e-001 1.9086e+000 6.0000e-002
1.2490e-001 1.9211e+000 6.0000e-002
1.2578e-001 1.9293e+000 6.0000e-002
1.2666e-001 1.9328e+000 6.0000e-002
1.2754e-001 1.9440e+000 6.0000e-002
1.2842e-001 1.9548e+000 6.0000e-002
1.2930e-001 1.9619e+000 6.0000e-002
1.3018e-001 1.9700e+000 6.0000e-002
1.3106e-001 1.9758e+000 6.0000e-002
1.3194e-001 1.9853e+000 6.0000e-002
1.3282e-001 1.9969e+000 6.0000e-002
1.3370e-001 2.0034e+000 6.0000e-002
1.3458e-001 2.0091e+000 6.0000e-002
1.3545e-001 2.0162e+000 6.0000e-002
1.3633e-001 2.0239e+000 6.0000e-002
1.3721e-001 2.0309e+000 6.0000e-002
1.3809e-001 2.0378e+000 6.0000e-002
1.3897e-001 2.0400e+000 6.0000e-002
1.3985e-001 2.0428e+000 6.0000e-002
1.4073e-001 2.0496e+000 6.0000e-002
1.4161e-001 2.0568e+000 6.0000e-002
1.4249e-001 2.0625e+000 6.0000e-002
1.4337e-001 2.0648e+000 6.0000e-002
1.4425e-001 2.0631e+000 6.0000e-002
1.4512e-001 2.0676e+000 6.0000e-002
1.4600e-001 2.0700e+000 6.0000e-002
1.4688e-001 2.0755e+000 6.0000e-002
1.4776e-001 2.0811e+000 6.0000e-002
1.4864e-001 2.0869e+000 6.0000e-002
1.4952e-001 2.0857e+000 6.0000e-002
1.5040e-001 2.0851e+000 6.0000e-002
1.5128e-001 2.0882e+000 6.0000e-002
1.5216e-001 2.0906e+000 6.0000e-002
1.5304e-001 2.0920e+000 6.0000e-002
1.5392e-001 2.0923e+000 6.0000e-002
1.5479e-001 2.0909e+000 6.0000e-002
1.5567e-001 2.0903e+000 6.0000e-002
1.5655e-001 2.0913e+000 6.0000e-002
1.5743e-001 2.0882e+000 6.0000e-002
1.5831e-001 2.0898e+000 6.0000e-002
1.5919e-001 2.0833e+000 6.0000e-002
1.6007e-001 2.0840e+000 6.0000e-002
1.6095e-001 2.0817e+000 6.0000e-002
1.6183e-001 2.0801e+000 6.0000e-002
1.6270e-001 2.0732e+000 6.0000e-002
1.6358e-001 2.0721e+000 6.0000e-002
1.6446e-001 2.0696e+000 6.0000e-002
1.6534e-001 2.0672e+000 6.0000e-002
1.6622e-001 2.0611e+000 6.0000e-002
1.6710e-001 2.0552e+000 6.0000e-002
1.6798e-001 2.0530e+000 6.0000e-002
1.6886e-001 2.0530e+000 6.0000e-002
1.6973e-001 2.0468e+000 6.0000e-002
1.7061e-001 2.0389e+000 6.0000e-002
1.7149e-001 2.0294e+000 6.0000e-002
1.7237e-001 2.0235e+000 6.0000e-002
1.7325e-001 2.0237e+000 6.0000e-002
1.7413e-001 2.0139e+000 6.0000e-002
1.7501e-001 2.0016e+000 6.0000e-002
1.7589e-001 1.9897e+000 6.0000e-002
1.7676e-001 1.9883e+000 6.0000e-002
1.7764e-001 1.9798e+000 6.0000e-002
1.7852e-001 1.9671e+000 6.0000e-002
1.7940e-001 1.9567e+000 6.0000e-002
1.8028e-001 1.9496e+000 6.0000e-002
1.8116e-001 1.9394e+000 6.0000e-002
1.8204e-001 1.9290e+000 6.0000e-002
1.8291e-001 1.9170e+000 6.0000e-002
1.8379e-001 1.9053e+000 6.0000e-002
1.8467e-001 1.8908e+000 6.0000e-002
1.8555e-001 1.8787e+000 6.0000e-002
1.8643e-001 1.8683e+000 6.0000e-002
1.8731e-001 1.8570e+000 6.0000e-002
1.8819e-001 1.8464e+000 6.0000e-002
1.8907e-001 1.8335e+000 6.0000e-002
1.8994e-001 1.8189e+000 6.0000e-002
1.9082e-001 1.8056e+000 6.0000e-002
1.9170e-001 1.7913e+000 6.0000e-002
1.9258e-001 1.7782e+000 6.0000e-002
1.9346e-001 1.7630e+000 6.0000e-002
1.9434e-001 1.7475e+000 6.0000e-002
1.9522e-001 1.7331e+000 6.0000e-002
1.9609e-001 1.7109e+000 6.0000e-002
1.9697e-001 1.6945e+000 6.0000e-002
1.9785e-001 1.6789e+000 6.0000e-002
1.9873e-001 1.6643e+000 6.0000e-002
1.9961e-001 1.6503e+000 6.0000e-002
2.0049e-001 1.6356e+000 6.0000e-002
2.0136e-001 1.6130e+000 6.0000e-002
2.0224e-001 1.5940e+000 6.0000e-002
2.0312e-001 1.5812e+000 6.0000e-002
2.0400e-001 1.5639e+000 6.0000e-002
2.0488e-001 1.5444e+000 6.0000e-002
2.0575e-001 1.5342e+000 6.0000e-002
2.0663e-001 1.5172e+000 6.0000e-002
2.0751e-001 1.5019e+000 6.0000e-002
2.0839e-001 1.4751e+000 6.0000e-002
2.0927e-001 1.4500e+000 6.0000e-002
2.1015e-001 1.4405e+000 6.0000e-002
2.1102e-001 1.4261e+000 6.0000e-002
2.1190e-001 1.4027e+000 6.0000e-002
2.1278e-001 1.3770e+000 6.0000e-002
2.1366e-001 1.3580e+000 6.0000e-002
2.1454e-001 1.3423e+000 6.0000e-002
2.1542e-001 1.3240e+000 6.0000e-002
2.1629e-001 1.3008e+000 6.0000e-002
2.1717e-001 1.2797e+000 6.0000e-002
2.1805e-001 1.2590e+000 6.0000e-002
2.1893e-001 1.2377e+000 6.0000e-002
2.1981e-001 1.2234e+000 6.0000e-002
2.2068e-001 1.1988e+000 6.0000e-002
2.2156e-001 1.1736e+000 6.0000e-002
2.2244e-001 1.1520e+000 6.0000e-002
2.2332e-001 1.1369e+000 6.0000e-002
2.2420e-001 1.1247e+000 6.0000e-002
2.2508e-001 1.0970e+000 6.0000e-002
2.2595e-001 1.0768e+000 6.0000e-002
2.2683e-001 1.0573e+000 6.0000e-002
2.2771e-001 1.0485e+000 6.0000e-002
2.2859e-001 1.0331e+000 6.0000e-002
2.2947e-001 9.9781e-001 6.0000e-002
2.3034e-001 9.8274e-001 6.0000e-002
2.3122e-001 9.5936e-001 6.0000e-002
2.3210e-001 9.4556e-001 6.0000e-002
2.3298e-001 9.2641e-001 6.0000e-002
2.3386e-001 8.9979e-001 6.0000e-002
2.3473e-001 8.7224e-001 6.0000e-002
2.3561e-001 8.4487e-001 6.0000e-002
2.3649e-001 8.3621e-001 6.0000e-002
2.3737e-001 8.1210e-001 6.0000e-002
2.3824e-001 7.8472e-001 6.0000e-002
2.3912e-001 7.7630e-001 6.0000e-002
2.4000e-001 7.6718e-001 6.0000e-002
2.4088e-001 7.3474e-001 6.0000e-002
2.4176e-001 7.1026e-001 6.0000e-002
2.4263e-001 6.9426e-001 6.0000e-002
2.4351e-001 6.7445e-001 6.0000e-002
2.4439e-001 6.3762e-001 6.0000e-002
2.4527e-001 6.2903e-001 6.0000e-002
2.4614e-001 5.9990e-001 6.0000e-002
2.4702e-001 5.7708e-001 6.0000e-002
2.4790e-001 5.4979e-001 6.0000e-002
2.4878e-001 5.2945e-001 6.0000e-002
2.4965e-001 5.0062e-001 6.0000e-002
2.5053e-001 4.7756e-001 6.0000e-002
2.5141e-001 4.9440e-001 6.0000e-002
2.5229e-001 4.8353e-001 6.0000e-002
2.5316e-001 4.5374e-001 6.0000e-002
2.5404e-001 4.2677e-001 6.0000e-002
2.5492e-001 4.0416e-001 6.0000e-002
2.5580e-001 4.1455e-001 6.0000e-002
2.5667e-001 3.9953e-001 6.0000e-002
2.5755e-001 3.7244e-001 6.0000e-002
2.5843e-001 3.7069e-001 6.0000e-002
2.5931e-001 3.5309e-001 6.0000e-002
2.6019e-001 2.8659e-001 6.0000e-002
2.6106e-001 2.7903e-001 6.0000e-002
2.6194e-001 2.6715e-001 6.0000e-002
2.6282e-001 2.8209e-001 6.0000e-002
2.6369e-001 3.2571e-001 6.0000e-002
2.6457e-001 2.7774e-001 6.0000e-002
2.6545e-001 1.9505e-001 6.0000e-002
2.6633e-001 1.8964e-001 6.0000e-002
2.6720e-001 2.4413e-001 6.0000e-002
2.6808e-001 2.4247e-001 6.0000e-002
2.6896e-001 2.2100e-001 6.0000e-002
2.6983e-001 1.9133e-001 6.0000e-002
2.7071e-001 8.5608e-002 6.0000e-002
2.7159e-001 5.2425e-002 6.0000e-002
2.7247e-001 1.5504e-001 6.0000e-002
2.7334e-001 1.9345e-001 6.0000e-002
2.7422e-001 1.6290e-001 6.0000e-002
2.7510e-001 1.1763e-001 6.0000e-002
2.7598e-001 2.0679e-001 6.0000e-002
2.7685e-001 3.0643e-001 6.0000e-002
2.7773e-001 3.0713e-001 6.0000e-002
2.7861e-001 2.5131e-001 6.0000e-002
2.7948e-001 2.6700e-001 6.0000e-002
2.8036e-001 2.8910e-001 6.0000e-002
2.8124e-001 3.4497e-001 6.0000e-002
2.8212e-001 3.7470e-001 6.0000e-002
2.8299e-001 3.9233e-001 6.0000e-002
2.8387e-001 3.5944e-001 6.0000e-002
2.8475e-001 3.2616e-001 6.0000e-002
2.8562e-001 3.3161e-001 6.0000e-002
2.8650e-001 3.2215e-001 6.0000e-002
2.8738e-001 2.8382e-001 6.0000e-002
2.8825e-001 2.9117e-001 6.0000e-002
2.8913e-001 3.0411e-001 6.0000e-002
2.9001e-001 3.5071e-001 6.0000e-002
2.9089e-001 3.9478e-001 6.0000e-002
2.9176e-001 3.9508e-001 6.0000e-002
2.9264e-001 3.7933e-001 6.0000e-002
2.9352e-001 3.9128e-001 6.0000e-002
2.9439e-001 3.7947e-001 6.0000e-002
2.9527e-001 4.3281e-001 6.0000e-002
2.9615e-001 4.2579e-001 6.0000e-002
2.9702e-001 4.4846e-001 6.0000e-002
2.9790e-001 4.8861e-001 6.0000e-002
2.9878e-001 4.8860e-001 6.0000e-002
2.9965e-001 4.7726e-001 6.0000e-002
3.0053e-001 5.0691e-001 6.0000e-002
3.0141e-001 5.4047e-001 6.0000e-002
3.0228e-001 5.5817e-001 6.0000e-002
3.0316e-001 5.6263e-001 6.0000e-002
3.0404e-001 5.2506e-001 6.0000e-002
3.0491e-001 5.5861e-001 6.0000e-002
3.0579e-001 5.7688e-001 6.0000e-002
3.0667e-001 5.7717e-001 6.0000e-002
3.0754e-001 6.0914e-001 6.0000e-002
3.0842e-001 6.1326e-001 6.0000e-002
3.0929e-001 6.0407e-001 6.0000e-002
3.1017e-001 6.2837e-001 6.0000e-002
3.1105e-001 6.3519e-001 6.0000e-002
3.1192e-001 6.1033e-001 6.0000e-002
3.1280e-001 6.0461e-001 6.0000e-002
3.1368e-001 6.0584e-001 6.0000e-002
3.1455e-001 6.2883e-001 6.0000e-002
3.1543e-001 6.4362e-001 6.0000e-002
3.1631e-001 6.3924e-001 6.0000e-002
3.1718e-001 6.5226e-001 6.0000e-002
3.1806e-001 6.6032e-001 6.0000e-002
3.1894e-001 6.8433e-001 6.0000e-002
3.1981e-001 6.9056e-001 6.0000e-002
3.2069e-001 6.7495e-001 6.0000e-002
3.2156e-001 6.7304e-001 6.0000e-002
3.2244e-001 6.9534e-001 6.0000e-002
3.2332e-001 6.9422e-001 6.0000e-002
3.2419e-001 6.9125e-001 6.0000e-002
3.2507e-001 6.9497e-001 6.0000e-002
3.2594e-001 6.9644e-001 6.0000e-002
3.2682e-001 6.9378e-001 6.0000e-002
3.2770e-001 6.9847e-001 6.0000e-002
3.2857e-001 7.1524e-001 6.0000e-002
3.2945e-001 7.2567e-001 6.0000e-002
3.3032e-001 7.0613e-001 6.0000e-002
3.3120e-001 7.0788e-001 6.0000e-002
3.3208e-001 7.3089e-001 6.0000e-002
3.3295e-001 7.1221e-001 6.0000e-002
3.3383e-001 7.0764e-001 6.0000e-002
3.3470e-001 7.1222e-001 6.0000e-002
3.3558e-001 7.0999e-001 6.0000e-002
3.3646e-001 7.2216e-001 6.0000e-002
3.3733e-001 7.2357e-001 6.0000e-002
3.3821e-001 7.2357e-001 6.0000e-002
3.3908e-001 7.4329e-001 6.0000e-002
3.3996e-001 7.3819e-001 6.0000e-002
3.4084e-001 7.4799e-001 6.0000e-002
3.4171e-001 7.3882e-001 6.0000e-002
3.4259e-001 7.3773e-001 6.0000e-002
3.4346e-001 7.3278e-001 6.0000e-002
3.4434e-001 7.1097e-001 6.0000e-002
3.4521e-001 7.0468e-001 6.0000e-002
3.4609e-001 6.9915e-001 6.0000e-002
3.4697e-001 7.1058e-001 6.0000e-002
3.4784e-001 7.1129e-001 6.0000e-002
3.4872e-001 6.9690e-001 6.0000e-002
3.4959e-001 6.9389e-001 6.0000e-002
3.5047e-001 6.9171e-001 6.0000e-002
3.5134e-001 6.8989e-001 6.0000e-002
3.5222e-001 6.9181e-001 6.0000e-002
3.5309e-001 6.7923e-001 6.0000e-002
3.5397e-001 6.6676e-001 6.0000e-002
3.5484e-001 6.5577e-001 6.0000e-002
3.5572e-001 6.8101e-001 6.0000e-002
3.5660e-001 6.9365e-001 6.0000e-002
3.5747e-001 6.6526e-001 6.0000e-002
3.5835e-001 6.7707e-001 6.0000e-002
3.5922e-001 6.7672e-001 6.0000e-002
3.6010e-001 6.6642e-001 6.0000e-002
3.6097e-001 6.7840e-001 6.0000e-002
3.6185e-001 6.9830e-001 6.0000e-002
3.6272e-001 6.6254e-001 6.0000e-002
3.6360e-001 6.2900e-001 6.0000e-002
3.6447e-001 6.1096e-001 6.0000e-002
3.6535e-001 6.0879e-001 6.0000e-002
3.6622e-001 6.1927e-001 6.0000e-002
3.6710e-001 6.1773e-001 6.0000e-002
3.6797e-001 6.0443e-001 6.0000e-002
3.6885e-001 5.9340e-001 6.0000e-002
3.6972e-001 6.0724e-001 6.0000e-002
3.7060e-001 6.0982e-001 6.0000e-002
3.7147e-001 5.5410e-001 6.0000e-002
3.7235e-001 5.4074e-001 6.0000e-002
3.7322e-001 5.5372e-001 6.0000e-002
3.7410e-001 5.6530e-001 6.0000e-002
3.7497e-001 5.2461e-001 6.0000e-002
3.7585e-001 5.5746e-001 6.0000e-002
3.7672e-001 5.4183e-001 6.0000e-002
3.7760e-001 5.0385e-001 6.0000e-002
3.7847e-001 4.9598e-001 6.0000e-002
3.7935e-001 5.0060e-001 6.0000e-002
3.8022e-001 5.1123e-001 6.0000e-002
3.8110e-001 5.1792e-001 6.0000e-002
3.8197e-001 4.8356e-001 6.0000e-002
3.8285e-001 4.4893e-001 6.0000e-002
3.8372e-001 4.6434e-001 6.0000e-002
3.8460e-001 4.3629e-001 6.0000e-002
3.8547e-001 4.5193e-001 6.0000e-002
3.8634e-001 5.2366e-001 6.0000e-002
3.8722e-001 4.8876e-001 6.0000e-002
3.8809e-001 4.5406e-001 6.0000e-002
3.8897e-001 4.3546e-001 6.0000e-002
3.8984e-001 3.9717e-001 6.0000e-002
3.9072e-001 3.8488e-001 6.0000e-002
3.9159e-001 3.1246e-001 6.0000e-002
3.9247e-001 3.5586e-001 6.0000e-002
3.9334e-001 2.8157e-001 6.0000e-002
3.9422e-001 2.8084e-001 6.0000e-002
3.9509e-001 3.0004e-001 6.0000e-002
3.9597e-001 3.2460e-001 6.0000e-002
3.9684e-001 3.0373e-001 6.0000e-002
3.9771e-001 2.4428e-001 6.0000e-002
3.9859e-001 1.1411e-001 6.0000e-002
3.9946e-001 2.2836e-001 6.0000e-002
4.0034e-001 2.6381e-001 6.0000e-002
4.0121e-001 2.4433e-001 6.0000e-002
4.0208e-001 2.1554e-001 6.0000e-002
4.0296e-001 1.7504e-001 6.0000e-002
4.0383e-001 2.2596e-001 6.0000e-002
4.0471e-001 2.6982e-001 6.0000e-002
4.0558e-001 3.1332e-001 6.0000e-002
4.0646e-001 1.7398e-001 6.0000e-002
4.0733e-001 -4.3981e-002 6.0000e-002
4.0820e-001 -1.0004e-001 6.0000e-002
4.0908e-001 1.3486e-001 6.0000e-002
4.0995e-001 2.3972e-001 6.0000e-002
4.1083e-001 2.0434e-001 6.0000e-002
4.1170e-001 2.6696e-001 6.0000e-002
4.1257e-001 2.0408e-001 6.0000e-002
4.1345e-001 1.8724e-001 6.0000e-002
4.1432e-001 1.7469e-001 6.0000e-002
4.1519e-001 -3.7328e-002 6.0000e-002
4.1607e-001 9.6764e-002 6.0000e-002
4.1694e-001 1.4205e-001 6.0000e-002
4.1782e-001 1.6769e-001 6.0000e-002
4.1869e-001 3.5335e-002 6.0000e-002
4.1956e-001 -3.9848e-002 6.0000e-002
4.2044e-001 -4.1971e-002 6.0000e-002
4.2131e-001 2.1556e-001 6.0000e-002
4.2218e-001 1.4552e-001 6.0000e-002
4.2306e-001 -1.8548e-002 6.0000e-002
4.2393e-001 -9.2083e-002 6.0000e-002
4.2480e-001 9.9070e-002 6.0000e-002
4.2568e-001 -2.3636e-001 6.0000e-002
4.2655e-001 -1.7782e-001 6.0000e-002
4.2743e-001 1.3293e-001 6.0000e-002
4.2830e-001 1.8488e-001 6.0000e-002
4.2917e-001 1.6539e-001 6.0000e-002
4.3005e-001 2.0569e-001 6.0000e-002
4.3092e-001 2.5932e-001 6.0000e-002
4.3179e-001 2.7333e-001 6.0000e-002
4.3267e-001 2.1096e-001 6.0000e-002
4.3354e-001 1.0539e-002 6.0000e-002
4.3441e-001 -1.4893e-001 6.0000e-002
4.3528e-001 1.6401e-001 6.0000e-002
4.3616e-001 1.8200e-001 6.0000e-002
4.3703e-001 2.6728e-001 6.0000e-002
4.3790e-001 2.5353e-001 6.0000e-002
4.3878e-001 1.5778e-001 6.0000e-002
4.3965e-001 1.8620e-001 6.0000e-002
4.4052e-001 -3.6331e-002 6.0000e-002
4.4140e-001 -6.1001e-002 6.0000e-002
4.4227e-001 2.5106e-001 6.0000e-002
4.4314e-001 2.2771e-001 6.0000e-002
4.4402e-001 2.7532e-001 6.0000e-002
4.4489e-001 2.6120e-001 6.0000e-002
4.4576e-001 2.8288e-001 6.0000e-002
4.4664e-001 2.3413e-001 6.0000e-002
4.4751e-001 2.2709e-001 6.0000e-002
4.4838e-001 2.8835e-001 6.0000e-002
4.4925e-001 3.5200e-001 6.0000e-002
4.5013e-001 3.6194e-001 6.0000e-002
4.5100e-001 3.1992e-001 6.0000e-002
4.5187e-001 3.7306e-001 6.0000e-002
4.5275e-001 3.8592e-001 6.0000e-002
4.5362e-001 4.4869e-001 6.0000e-002
4.5449e-001 4.7477e-001 6.0000e-002
4.5536e-001 3.5737e-001 6.0000e-002
4.5624e-001 2.6158e-001 6.0000e-002
4.5711e-001 2.3102e-001 6.0000e-002
4.5798e-001 2.9641e-001 6.0000e-002
4.5885e-001 3.5224e-001 6.0000e-002
4.5972e-001 3.9554e-001 6.0000e-002
4.6060e-001 3.4463e-001 6.0000e-002
4.6147e-001 3.0877e-001 6.0000e-002
4.6234e-001 3.2348e-001 6.0000e-002
4.6321e-001 3.8692e-001 6.0000e-002
4.6409e-001 3.4084e-001 6.0000e-002
4.6496e-001 4.0993e-001 6.0000e-002
4.6583e-001 4.6179e-001 6.0000e-002
4.6670e-001 4.7111e-001 6.0000e-002
4.6758e-001 4.0484e-001 6.0000e-002
4.6845e-001 4.2169e-001 6.0000e-002
4.6932e-001 3.9948e-001 6.0000e-002
4.7019e-001 4.7273e-001 6.0000e-002
4.7107e-001 3.3949e-001 6.0000e-002
4.7194e-001 4.0225e-001 6.0000e-002
4.7281e-001 3.4131e-001 6.0000e-002
4.7368e-001 3.4251e-001 6.0000e-002
4.7455e-001 3.8800e-001 6.0000e-002
4.7542e-001 5.2756e-001 6.0000e-002
4.7630e-001 4.8952e-001 6.0000e-002
4.7717e-001 4.8680e-001 6.0000e-002
4.7804e-001 5.1282e-001 6.0000e-002
4.7891e-001 4.0006e-001 6.0000e-002
4.7978e-001 4.9809e-001 6.0000e-002
4.8066e-001 4.9169e-001 6.0000e-002
4.8153e-001 4.7747e-001 6.0000e-002
4.8240e-001 5.0585e-001 6.0000e-002
4.8327e-001 4.8572e-001 6.0000e-002
4.8414e-001 4.4220e-001 6.0000e-002
4.8501e-001 4.4971e-001 6.0000e-002
4.8589e-001 5.5107e-001 6.0000e-002
4.8676e-001 5.2319e-001 6.0000e-002
4.8763e-001 5.2665e-001 6.0000e-002
4.8850e-001 4.9884e-001 6.0000e-002
4.8937e-001 5.0451e-001 6.0000e-002
4.9024e-001 4.9831e-001 6.0000e-002
4.9112e-001 4.8692e-001 6.0000e-002
4.9199e-001 5.6259e-001 6.0000e-002
4.9286e-001 5.9152e-001 6.0000e-002
4.9373e-001 6.0764e-001 6.0000e-002
4.9460e-001 5.0681e-001 6.0000e-002
4.9547e-001 5.2455e-001 6.0000e-002
4.9634e-001 5.6372e-001 6.0000e-002
4.9722e-001 5.3900e-001 6.0000e-002
4.9809e-001 5.1012e-001 6.0000e-002
4.9896e-001 4.8726e-001 6.0000e-002
4.9983e-001 4.3968e-001 6.0000e-002
5.0070e-001 3.3127e-001 6.0000e-002
5.0157e-001 3.5026e-001 6.0000e-002
5.0244e-001 4.6755e-001 6.0000e-002
5.0331e-001 5.1277e-001 6.0000e-002
5.0418e-001 4.7138e-001 6.0000e-002
5.0506e-001 5.4438e-001 6.0000e-002
5.0593e-001 5.7444e-001 6.0000e-002
5.0680e-001 5.0696e-001 6.0000e-002
5.0767e-001 4.8844e-001 6.0000e-002
5.0854e-001 4.7609e-001 6.0000e-002
5.0941e-001 4.7049e-001 6.0000e-002
5.1028e-001 5.5055e-001 6.0000e-002
5.1115e-001 5.7002e-001 6.0000e-002
5.1202e-001 5.6628e-001 6.0000e-002
5.1289e-001 4.9168e-001 6.0000e-002
5.1376e-001 5.2508e-001 6.0000e-002
5.1463e-001 4.9023e-001 6.0000e-002
5.1550e-001 4.2832e-001 6.0000e-002
5.1638e-001 4.1775e-001 6.0000e-002
5.1724e-001 4.5165e-001 6.0000e-002
5.1812e-001 5.0885e-001 6.0000e-002
5.1899e-001 5.1812e-001 6.0000e-002
5.1986e-001 4.9756e-001 6.0000e-002
5.2073e-001 4.0219e-001 6.0000e-002
5.2160e-001 3.0709e-001 6.0000e-002
5.2247e-001 3.2884e-001 6.0000e-002
5.2334e-001 3.6902e-001 6.0000e-002
5.2421e-001 4.2808e-001 6.0000e-002
5.2508e-001 4.6666e-001 6.0000e-002
5.2595e-001 4.9910e-001 6.0000e-002
5.2682e-001 4.4895e-001 6.0000e-002
5.2769e-001 3.3381e-001 6.0000e-002
5.2856e-001 3.3716e-001 6.0000e-002
5.2943e-001 3.9272e-001 6.0000e-002
5.3030e-001 4.7832e-001 6.0000e-002
5.3117e-001 5.3850e-001 6.0000e-002
5.3204e-001 4.4535e-001 6.0000e-002
5.3291e-001 4.0232e-001 6.0000e-002
5.3378e-001 3.8895e-001 6.0000e-002
5.3465e-001 3.8131e-001 6.0000e-002
5.3552e-001 2.6396e-001 6.0000e-002
5.3639e-001 3.5389e-001 6.0000e-002
5.3726e-001 4.1902e-001 6.0000e-002
5.3813e-001 4.1722e-001 6.0000e-002
5.3900e-001 3.4808e-001 6.0000e-002
5.3987e-001 3.1091e-001 6.0000e-002
5.4074e-001 4.5206e-001 6.0000e-002
5.4161e-001 4.5567e-001 6.0000e-002
5.4248e-001 4.8217e-001 6.0000e-002
5.4335e-001 4.6512e-001 6.0000e-002
5.4422e-001 4.0079e-001 6.0000e-002
5.4509e-001 3.1848e-001 6.0000e-002
5.4595e-001 4.4646e-001 6.0000e-002
5.4683e-001 3.6133e-001 6.0000e-002
5.4769e-001 2.0164e-001 6.0000e-002
5.4856e-001 1.3341e-001 6.0000e-002
5.4943e-001 3.0457e-001 6.0000e-002
5.5030e-001 3.4980e-001 6.0000e-002
5.5117e-001 3.7580e-001 6.0000e-002
5.5204e-001 4.2150e-001 6.0000e-002
5.5291e-001 3.3976e-001 6.0000e-002
5.5378e-001 3.9880e-001 6.0000e-002
5.5465e-001 3.0435e-001 6.0000e-002
5.5552e-001 2.8380e-001 6.0000e-002
5.5639e-001 3.8269e-001 6.0000e-002
5.5726e-001 3.5746e-001 6.0000e-002
5.5812e-001 3.8292e-001 6.0000e-002
5.5899e-001 4.0519e-001 6.0000e-002
5.5986e-001 4.3074e-001 6.0000e-002
5.6073e-001 4.3858e-001 6.0000e-002
5.6160e-001 4.0824e-001 6.0000e-002
5.6247e-001 3.9678e-001 6.0000e-002
5.6334e-001 3.1629e-001 6.0000e-002
5.6421e-001 6.4824e-002 6.0000e-002
5.6508e-001 2.8267e-001 6.0000e-002
5.6594e-001 3.2213e-001 6.0000e-002
5.6681e-001 3.1417e-001 6.0000e-002
5.6768e-001 2.7898e-001 6.0000e-002
5.6855e-001 3.8829e-001 6.0000e-002
5.6942e-001 2.8176e-001 6.0000e-002
5.7029e-001 6.0027e-002 6.0000e-002
5.7116e-001 3.2834e-001 6.0000e-002
5.7203e-001 2.6410e-001 6.0000e-002
5.7289e-001 2.7666e-001 6.0000e-002
5.7376e-001 3.1980e-001 6.0000e-002
5.7463e-001 2.8256e-001 6.0000e-002
5.7550e-001 3.5940e-001 6.0000e-002
5.7637e-001 3.3355e-001 6.0000e-002
5.7724e-001 1.1296e-001 6.0000e-002
5.7810e-001 2.3315e-001 6.0000e-002
5.7897e-001 3.3652e-001 6.0000e-002
5.7984e-001 3.4628e-001 6.0000e-002
5.8071e-001 3.3103e-001 6.0000e-002
5.8158e-001 3.7955e-001 6.0000e-002
5.8244e-001 3.0562e-001 6.0000e-002
5.8331e-001 3.6466e-001 6.0000e-002
5.8418e-001 3.3791e-001 6.0000e-002
5.8505e-001 4.3701e-001 6.0000e-002
5.8592e-001 2.8364e-001 6.0000e-002
5.8678e-001 -2.3264e-001 6.0000e-002
5.8765e-001 2.3459e-001 6.0000e-002
5.8852e-001 3.1999e-001 6.0000e-002
5.8939e-001 3.5285e-001 6.0000e-002
5.9025e-001 3.4457e-001 6.0000e-002
5.9112e-001 1.9631e-001 6.0000e-002
5.9199e-001 2.3618e-001 6.0000e-002
5.9286e-001 2.2132e-001 6.0000e-002
5.9372e-001 -2.7866e-001 6.0000e-002
5.9459e-001 6.9453e-002 6.0000e-002
5.9546e-001 1.5723e-001 6.0000e-002
5.9633e-001 2.0948e-001 6.0000e-002
5.9720e-001 -3.1223e-001 6.0000e-002
5.9806e-001 -5.9727e-002 6.0000e-002
5.9893e-001 -3.0072e-001 6.0000e-002
5.9980e-001 -2.3370e-001 6.0000e-002

## Sheet: DPPC_simulated
# DPPC bilayer X-ray scattering profiles calculated from molecular dynamics simulations
q (A-1)	|F|
	TIP3P	TIP3P-FB	TIP4P-FB
0	0.108515	1.8987	0.558505
0.00125665	0.107769	1.89616	0.55777
0.00251331	0.105531	1.88853	0.555566
0.00376996	0.101803	1.87583	0.551891
0.00502661	0.0965915	1.85806	0.546745
0.00628326	0.0899051	1.83524	0.540134
0.00753992	0.081765	1.80738	0.532067
0.00879657	0.0722456	1.77449	0.522572
0.0100532	0.0623989	1.73662	0.511721
0.0113099	0.0733007	1.69377	0.4998
0.0125665	0.111453	1.64598	0.489315
0.0138232	0.154231	1.59329	0.493085
0.0150798	0.20104	1.53574	0.503941
0.0163365	0.251806	1.47335	0.516471
0.0175931	0.306483	1.40618	0.530161
0.0188498	0.365028	1.33428	0.544902
0.0201064	0.427401	1.2577	0.560652
0.0213631	0.493556	1.17648	0.577392
0.0226197	0.56345	1.09069	0.595104
0.0238764	0.637033	1.00039	0.613778
0.0251331	0.714255	0.905648	0.633402
0.0263897	0.795064	0.806521	0.653966
0.0276464	0.879404	0.703084	0.675465
0.028903	0.967218	0.59541	0.697911
0.0301597	1.05845	0.483575	0.722584
0.0314163	1.15302	0.367659	0.812297
0.032673	1.25089	0.247747	0.910311
0.0339296	1.35198	0.123962	1.01163
0.0351863	1.45622	0.0807194	1.11615
0.0364429	1.56354	0.135163	1.22381
0.0376996	1.67386	0.2702	1.33452
0.0389562	1.78712	0.408789	1.44823
0.0402129	1.90323	0.550829	1.56485
0.0414695	2.02212	0.696221	1.68431
0.0427262	2.1437	0.844861	1.80653
0.0439828	2.2679	0.996644	1.93143
0.0452395	2.39461	1.15146	2.05893
0.0464962	2.52377	1.30921	2.18895
0.0477528	2.65528	1.46977	2.3214
0.0490095	2.78905	1.63304	2.4562
0.0502661	2.92499	1.79889	2.59326
0.0515228	3.06301	1.96721	2.73248
0.0527794	3.20301	2.13788	2.87378
0.0540361	3.34489	2.31079	3.01707
0.0552927	3.48857	2.4858	3.16225
0.0565494	3.63393	2.66281	3.30922
0.057806	3.78089	2.84167	3.45789
0.0590627	3.92933	3.02227	3.60817
0.0603193	4.07916	3.20448	3.75994
0.061576	4.23028	3.38817	3.91312
0.0628326	4.38258	3.57322	4.0676
0.0640893	4.53595	3.75948	4.22328
0.0653459	4.6903	3.94684	4.38006
0.0666026	4.84551	4.13516	4.53782
0.0678592	5.00147	4.32431	4.69648
0.0691159	5.15809	4.51415	4.85592
0.0703726	5.31525	4.70455	5.01603
0.0716292	5.47284	4.89538	5.17671
0.0728859	5.63076	5.08651	5.33786
0.0741425	5.78889	5.2778	5.49935
0.0753992	5.94713	5.46912	5.6611
0.0766558	6.10536	5.66033	5.82298
0.0779125	6.26348	5.8513	5.98489
0.0791691	6.42138	6.0419	6.14672
0.0804258	6.57895	6.23199	6.30836
0.0816824	6.73607	6.42144	6.4697
0.0829391	6.89264	6.61013	6.63064
0.0841957	7.04855	6.7979	6.79106
0.0854524	7.2037	6.98465	6.95085
0.086709	7.35796	7.17023	7.10991
0.0879657	7.51124	7.35451	7.26812
0.0892223	7.66343	7.53738	7.42539
0.090479	7.81442	7.7187	7.58159
0.0917357	7.96411	7.89834	7.73663
0.0929923	8.11239	8.07618	7.8904
0.094249	8.25915	8.2521	8.04279
0.0955056	8.4043	8.42597	8.1937
0.0967623	8.54773	8.59768	8.34302
0.0980189	8.68934	8.7671	8.49064
0.0992756	8.82902	8.93412	8.63648
0.100532	8.96669	9.09862	8.78041
0.101789	9.10224	9.26049	8.92235
0.103046	9.23558	9.41961	9.0622
0.104302	9.36661	9.57588	9.19984
0.105559	9.49524	9.72918	9.3352
0.106815	9.62138	9.87942	9.46817
0.108072	9.74493	10.0265	9.59866
0.109329	9.8658	10.1703	9.72657
0.110585	9.98392	10.3107	9.85182
0.111842	10.0992	10.4476	9.97431
0.113099	10.2115	10.581	10.094
0.114355	10.3209	10.7107	10.2107
0.115612	10.4271	10.8367	10.3244
0.116869	10.5302	10.9589	10.435
0.118125	10.63	11.0771	10.5424
0.119382	10.7265	11.1913	10.6465
0.120639	10.8196	11.3015	10.7474
0.121895	10.9093	11.4075	10.8448
0.123152	10.9954	11.5092	10.9387
0.124409	11.078	11.6067	11.0291
0.125665	11.1569	11.6998	11.1158
0.126922	11.232	11.7885	11.1989
0.128179	11.3034	11.8727	11.2782
0.129435	11.371	11.9524	11.3536
0.130692	11.4347	12.0274	11.4253
0.131949	11.4945	12.0978	11.4929
0.133205	11.5502	12.1635	11.5566
0.134462	11.602	12.2245	11.6162
0.135718	11.6497	12.2806	11.6718
0.136975	11.6932	12.332	11.7232
0.138232	11.7327	12.3785	11.7705
0.139488	11.7679	12.42	11.8135
0.140745	11.7989	12.4567	11.8522
0.142002	11.8257	12.4884	11.8867
0.143258	11.8482	12.5151	11.9168
0.144515	11.8664	12.5369	11.9426
0.145772	11.8803	12.5536	11.9639
0.147028	11.8899	12.5653	11.9809
0.148285	11.8951	12.572	11.9934
0.149542	11.896	12.5736	12.0015
0.150798	11.8924	12.5702	12.005
0.152055	11.8845	12.5618	12.0041
0.153312	11.8722	12.5483	11.9988
0.154568	11.8555	12.5298	11.9888
0.155825	11.8345	12.5063	11.9744
0.157082	11.809	12.4778	11.9555
0.158338	11.7792	12.4443	11.9321
0.159595	11.745	12.4059	11.9041
0.160852	11.7064	12.3625	11.8717
0.162108	11.6635	12.3142	11.8348
0.163365	11.6162	12.261	11.7934
0.164622	11.5647	12.203	11.7475
0.165878	11.5089	12.1401	11.6972
0.167135	11.4488	12.0725	11.6424
0.168391	11.3845	12.0001	11.5833
0.169648	11.316	11.9231	11.5198
0.170905	11.2433	11.8414	11.4519
0.172161	11.1666	11.7552	11.3798
0.173418	11.0857	11.6644	11.3033
0.174675	11.0008	11.5691	11.2227
0.175931	10.9119	11.4694	11.1378
0.177188	10.819	11.3653	11.0488
0.178445	10.7222	11.257	10.9557
0.179701	10.6216	11.1444	10.8586
0.180958	10.5172	11.0277	10.7574
0.182215	10.409	10.9069	10.6523
0.183471	10.2971	10.7821	10.5433
0.184728	10.1817	10.6533	10.4305
0.185985	10.0626	10.5208	10.3139
0.187241	9.9401	10.3844	10.1936
0.188498	9.81415	10.2444	10.0697
0.189755	9.68484	10.1008	9.94218
0.191011	9.55225	9.95362	9.81119
0.192268	9.41645	9.80307	9.67679
0.193525	9.27751	9.64919	9.53904
0.194781	9.13551	9.49209	9.39802
0.196038	8.99054	9.33184	9.25382
0.197294	8.84268	9.16856	9.10652
0.198551	8.692	9.00234	8.95619
0.199808	8.53859	8.83329	8.80294
0.201064	8.38254	8.6615	8.64684
0.202321	8.22393	8.48708	8.48799
0.203578	8.06287	8.31013	8.32647
0.204834	7.89942	8.13077	8.16239
0.206091	7.7337	7.94909	7.99583
0.207348	7.56579	7.76521	7.82689
0.208604	7.39578	7.57923	7.65567
0.209861	7.22378	7.39128	7.48227
0.211118	7.04988	7.20145	7.30678
0.212374	6.87417	7.00986	7.12932
0.213631	6.69677	6.81663	6.94998
0.214888	6.51776	6.62187	6.76887
0.216144	6.33724	6.42569	6.58609
0.217401	6.15533	6.22821	6.40175
0.218658	5.97211	6.02954	6.21595
0.219914	5.7877	5.82981	6.02881
0.221171	5.6022	5.62911	5.84042
0.222428	5.4157	5.42758	5.6509
0.223684	5.22833	5.22532	5.46037
0.224941	5.04017	5.02246	5.26891
0.226197	4.85134	4.8191	5.07666
0.227454	4.66193	4.61537	4.88372
0.228711	4.47206	4.41138	4.69019
0.229967	4.28183	4.20725	4.49619
0.231224	4.09135	4.00309	4.30183
0.232481	3.90072	3.79901	4.10723
0.233737	3.71004	3.59513	3.91248
0.234994	3.51942	3.39157	3.71771
0.236251	3.32896	3.18843	3.52302
0.237507	3.13877	2.98583	3.32852
0.238764	2.94896	2.78388	3.13432
0.240021	2.75962	2.58269	2.94053
0.241277	2.57085	2.38237	2.74726
0.242534	2.38276	2.18302	2.55461
0.243791	2.19546	1.98476	2.3627
0.245047	2.00903	1.78769	2.17163
0.246304	1.82358	1.59191	1.9815
0.247561	1.63921	1.39754	1.79242
0.248817	1.45602	1.20466	1.6045
0.250074	1.27409	1.01339	1.41783
0.251331	1.09354	0.823814	1.23251
0.252587	0.914444	0.636039	1.04866
0.253844	0.736906	0.45016	0.866374
0.255101	0.561018	0.273442	0.685765
0.256357	0.386879	0.305718	0.506991
0.257614	0.214624	0.365174	0.330731
0.25887	0.107482	0.423634	0.21808
0.260127	0.16218	0.481108	0.157486
0.261384	0.290912	0.620201	0.190097
0.26264	0.455022	0.790259	0.358847
0.263897	0.616942	0.957729	0.525365
0.265154	0.776549	1.12252	0.689532
0.26641	0.93376	1.28456	0.85126
0.267667	1.0885	1.44377	1.01047
0.268924	1.24069	1.60007	1.16707
0.27018	1.39025	1.7534	1.321
0.271437	1.53713	1.90369	1.47217
0.272694	1.68124	2.05087	1.62053
0.27395	1.82254	2.19487	1.76599
0.275207	1.96094	2.33564	1.90849
0.276464	2.09639	2.47312	2.04797
0.27772	2.22883	2.60725	2.18437
0.278977	2.35821	2.73797	2.31762
0.280234	2.48447	2.86524	2.44766
0.28149	2.60755	2.989	2.57446
0.282747	2.7274	3.10921	2.69794
0.284004	2.84399	3.22583	2.81806
0.28526	2.95725	3.3388	2.93478
0.286517	3.06715	3.4481	3.04804
0.287773	3.17365	3.55369	3.15782
0.28903	3.27671	3.65552	3.26406
0.290287	3.37629	3.75358	3.36673
0.291543	3.47235	3.84783	3.46579
0.2928	3.56488	3.93824	3.56122
0.294057	3.65383	4.0248	3.65299
0.295313	3.73918	4.10747	3.74106
0.29657	3.82091	4.18625	3.82542
0.297827	3.89899	4.26112	3.90604
0.299083	3.97341	4.33205	3.98291
0.30034	4.04415	4.39905	4.056
0.301597	4.11119	4.4621	4.12531
0.302853	4.17453	4.5212	4.19083
0.30411	4.23415	4.57634	4.25254
0.305367	4.29005	4.62753	4.31044
0.306623	4.34222	4.67476	4.36453
0.30788	4.39067	4.71804	4.41481
0.309137	4.43538	4.75738	4.46128
0.310393	4.47637	4.79279	4.50394
0.31165	4.51364	4.82427	4.54281
0.312907	4.5472	4.85185	4.57789
0.314163	4.57705	4.87553	4.60919
0.31542	4.60321	4.89534	4.63673
0.316676	4.6257	4.91131	4.66053
0.317933	4.64453	4.92344	4.68061
0.31919	4.65972	4.93177	4.69698
0.320446	4.6713	4.93633	4.70968
0.321703	4.67928	4.93715	4.71872
0.32296	4.68369	4.93426	4.72415
0.324216	4.68457	4.92769	4.72598
0.325473	4.68193	4.91748	4.72425
0.32673	4.67582	4.90367	4.719
0.327986	4.66627	4.8863	4.71027
0.329243	4.65331	4.86542	4.69809
0.3305	4.63698	4.84106	4.68251
0.331756	4.61733	4.81328	4.66357
0.333013	4.5944	4.78212	4.64131
0.33427	4.56822	4.74763	4.61579
0.335526	4.53885	4.70987	4.58705
0.336783	4.50633	4.66889	4.55514
0.33804	4.47072	4.62475	4.52011
0.339296	4.43206	4.5775	4.48202
0.340553	4.39041	4.52719	4.44093
0.34181	4.34582	4.4739	4.39689
0.343066	4.29835	4.41768	4.34996
0.344323	4.24806	4.3586	4.3002
0.34558	4.195	4.29672	4.24768
0.346836	4.13923	4.2321	4.19245
0.348093	4.08083	4.16481	4.13458
0.349349	4.01984	4.09493	4.07414
0.350606	3.95633	4.02252	4.01119
0.351863	3.89038	3.94764	3.9458
0.353119	3.82204	3.87038	3.87803
0.354376	3.75138	3.7908	3.80797
0.355633	3.67848	3.70898	3.73567
0.356889	3.6034	3.62499	3.66121
0.358146	3.5262	3.53891	3.58466
0.359403	3.44698	3.45081	3.5061
0.360659	3.36578	3.36077	3.4256
0.361916	3.2827	3.26886	3.34323
0.363173	3.1978	3.17517	3.25906
0.364429	3.11115	3.07977	3.17318
0.365686	3.02283	2.98274	3.08565
0.366943	2.93292	2.88416	2.99656
0.368199	2.84149	2.7841	2.90598
0.369456	2.74861	2.68266	2.81398
0.370713	2.65437	2.5799	2.72064
0.371969	2.55883	2.4759	2.62605
0.373226	2.46208	2.37076	2.53027
0.374483	2.3642	2.26455	2.43339
0.375739	2.26525	2.15734	2.33547
0.376996	2.16532	2.04922	2.2366
0.378252	2.06448	1.94027	2.13686
0.379509	1.96281	1.83056	2.03632
0.380766	1.86039	1.72019	1.93505
0.382022	1.75729	1.60922	1.83315
0.383279	1.65359	1.49774	1.73067
0.384536	1.54937	1.38582	1.6277
0.385792	1.4447	1.27355	1.52432
0.387049	1.33965	1.16099	1.42061
0.388306	1.2343	1.04824	1.31664
0.389562	1.12873	0.935358	1.2125
0.390819	1.02301	0.82243	1.10829
0.392076	0.917212	0.709529	1.00409
0.393332	0.811408	0.59673	0.900033
0.394589	0.705673	0.48411	0.796308
0.395846	0.600079	0.37176	0.693249
0.397102	0.4947	0.324291	0.591748
0.398359	0.389615	0.363494	0.495506
0.399616	0.284921	0.402576	0.420888
0.400872	0.180823	0.441262	0.372922
0.402129	0.0891788	0.479527	0.332368
0.403386	0.118922	0.517353	0.293613
0.404642	0.153178	0.554736	0.255576
0.405899	0.232414	0.59174	0.218254
0.407155	0.333505	0.630116	0.240062
0.408412	0.433984	0.723645	0.335263
0.409669	0.533649	0.828461	0.433198
0.410925	0.632417	0.932432	0.530542
0.412182	0.730225	1.03534	0.627048
0.413439	0.827013	1.13711	0.722614
0.414695	0.922725	1.23766	0.817169
0.415952	1.01731	1.33694	0.910653
0.417209	1.1107	1.4349	1.00301
0.418465	1.20287	1.53148	1.09419
0.419722	1.29374	1.62663	1.18414
0.420979	1.38329	1.7203	1.27282
0.422235	1.47146	1.81244	1.36018
0.423492	1.55821	1.90301	1.44617
0.424749	1.64349	1.99196	1.53076
0.426005	1.72726	2.07926	1.61391
0.427262	1.80948	2.16485	1.69558
0.428519	1.89011	2.2487	1.77573
0.429775	1.96913	2.33077	1.85433
0.431032	2.04648	2.41102	1.93134
0.432289	2.12213	2.48942	2.00673
0.433545	2.19607	2.56594	2.08048
0.434802	2.26824	2.64054	2.15254
0.436059	2.33863	2.71319	2.2229
0.437315	2.4072	2.78387	2.29153
0.438572	2.47394	2.85254	2.3584
0.439828	2.53881	2.91919	2.42349
0.441085	2.60179	2.98379	2.48679
0.442342	2.66286	3.04632	2.54826
0.443598	2.72201	3.10676	2.6079
0.444855	2.77921	3.16509	2.66568
0.446112	2.83446	3.22129	2.72159
0.447368	2.88772	3.27535	2.77562
0.448625	2.939	3.32725	2.82774
0.449882	2.98827	3.37699	2.87796
0.451138	3.03554	3.42455	2.92627
0.452395	3.08078	3.46993	2.97264
0.453652	3.124	3.51312	3.01709
0.454908	3.16519	3.55411	3.05959
0.456165	3.20434	3.59289	3.10016
0.457422	3.24146	3.62948	3.13877
0.458678	3.27654	3.66386	3.17544
0.459935	3.30958	3.69604	3.21017
0.461192	3.34059	3.72603	3.24295
0.462448	3.36956	3.75381	3.27378
0.463705	3.39651	3.77941	3.30268
0.464962	3.42144	3.80283	3.32964
0.466218	3.44436	3.82407	3.35468
0.467475	3.46528	3.84315	3.37779
0.468731	3.4842	3.86008	3.39899
0.469988	3.50114	3.87487	3.41829
0.471245	3.51612	3.88754	3.4357
0.472501	3.52914	3.8981	3.45123
0.473758	3.54023	3.90656	3.46489
0.475015	3.5494	3.91295	3.47671
0.476271	3.55666	3.91729	3.48668
0.477528	3.56204	3.9196	3.49484
0.478785	3.56556	3.91989	3.50119
0.480041	3.56724	3.9182	3.50576
0.481298	3.5671	3.91454	3.50856
0.482555	3.56516	3.90895	3.50961
0.483811	3.56145	3.90144	3.50895
0.485068	3.556	3.89205	3.50658
0.486325	3.54883	3.8808	3.50253
0.487581	3.53996	3.86773	3.49682
0.488838	3.52943	3.85287	3.48948
0.490095	3.51727	3.83624	3.48054
0.491351	3.5035	3.81788	3.47001
0.492608	3.48815	3.79782	3.45793
0.493865	3.47126	3.7761	3.44432
0.495121	3.45286	3.75275	3.42921
0.496378	3.43299	3.72781	3.41264
0.497634	3.41166	3.70132	3.39462
0.498891	3.38893	3.6733	3.37518
0.500148	3.36481	3.64381	3.35437
0.501404	3.33936	3.61287	3.33221
0.502661	3.31259	3.58053	3.30872
0.503918	3.28456	3.54682	3.28395
0.505174	3.25529	3.51179	3.25792
0.506431	3.22482	3.47548	3.23067
0.507688	3.1932	3.43793	3.20222
0.508944	3.16045	3.39918	3.17263
0.510201	3.12661	3.35927	3.1419
0.511458	3.09173	3.31824	3.11009
0.512714	3.05584	3.27614	3.07722
0.513971	3.01897	3.23301	3.04334
0.515228	2.98118	3.18889	3.00846
0.516484	2.94249	3.14383	2.97264
0.517741	2.90295	3.09786	2.9359
0.518998	2.86259	3.05104	2.89828
0.520254	2.82146	3.0034	2.85981
0.521511	2.77959	2.95499	2.82053
0.522768	2.73702	2.90586	2.78049
0.524024	2.69379	2.85604	2.7397
0.525281	2.64994	2.80559	2.69821
0.526538	2.60551	2.75454	2.65605
0.527794	2.56054	2.70293	2.61327
0.529051	2.51506	2.65082	2.56989
0.530307	2.46911	2.59824	2.52595
0.531564	2.42274	2.54524	2.48148
0.532821	2.37598	2.49186	2.43653
0.534077	2.32887	2.43814	2.39112
0.535334	2.28144	2.38412	2.3453
0.536591	2.23373	2.32986	2.2991
0.537847	2.18578	2.27538	2.25254
0.539104	2.13762	2.22073	2.20568
0.540361	2.0893	2.16595	2.15853
0.541617	2.04084	2.11108	2.11115
0.542874	1.99229	2.05616	2.06355
0.544131	1.94366	2.00123	2.01578
0.545387	1.89501	1.94633	1.96786
0.546644	1.84637	1.89149	1.91984
0.547901	1.79776	1.83676	1.87173
0.549157	1.74922	1.78218	1.82359
0.550414	1.70078	1.72777	1.77543
0.551671	1.65248	1.67358	1.72729
0.552927	1.60434	1.61963	1.6792
0.554184	1.5564	1.56598	1.6312
0.555441	1.50868	1.51264	1.58331
0.556697	1.46122	1.45965	1.53556
0.557954	1.41404	1.40705	1.48798
0.55921	1.36717	1.35487	1.4406
0.560467	1.32064	1.30313	1.39346
0.561724	1.27448	1.25187	1.34657
0.56298	1.2287	1.20113	1.29997
0.564237	1.18334	1.15092	1.25368
0.565494	1.13843	1.10127	1.20773
0.56675	1.09398	1.05222	1.16215
0.568007	1.05001	1.00378	1.11696
0.569264	1.00656	0.955996	1.07219
0.57052	0.963645	0.908877	1.02785
0.571777	0.92128	0.862452	0.983987
0.573034	0.87949	0.816743	0.940609
0.57429	0.838295	0.771772	0.897742
0.575547	0.797712	0.727562	0.855409
0.576804	0.757761	0.684132	0.813632
0.57806	0.718459	0.641503	0.772431
0.579317	0.679822	0.599691	0.731827
0.580574	0.641867	0.558717	0.69184
0.58183	0.604609	0.518595	0.652491
0.583087	0.568062	0.479343	0.613797
0.584344	0.53224	0.440975	0.575779
0.5856	0.497156	0.403505	0.538455
0.586857	0.462823	0.366947	0.501843
0.588113	0.429252	0.331314	0.465964
0.58937	0.396454	0.296616	0.430836
0.590627	0.364439	0.262865	0.396483
0.591883	0.333217	0.230072	0.362928
0.59314	0.302796	0.198246	0.330203
0.594397	0.273185	0.167401	0.29835
0.595653	0.244392	0.137564	0.267435
0.59691	0.216425	0.109093	0.23757
0.598167	0.18929	0.0942507	0.208981
0.599423	0.162997	0.0931339	0.18216
0.60068	0.137561	0.0984799	0.158157
0.601937	0.113017	0.103468	0.138286
0.603193	0.0895404	0.108073	0.122307
0.60445	0.070652	0.112294	0.108667
0.605707	0.0616522	0.116133	0.0963033
0.606963	0.0538942	0.119595	0.0847452
0.60822	0.0577045	0.122696	0.0737956
0.609477	0.0633366	0.126277	0.0634058
0.610733	0.0686864	0.143521	0.0610781
0.61199	0.0737891	0.160418	0.0710086
0.613247	0.078916	0.176339	0.0897239
0.614503	0.0882873	0.191282	0.108183
0.61576	0.102966	0.205251	0.125864
0.617017	0.117335	0.21825	0.142714
0.618273	0.130959	0.230288	0.158719
0.61953	0.143786	0.241373	0.173872
0.620786	0.155808	0.251513	0.188173
0.622043	0.167025	0.260717	0.201622
0.6233	0.177441	0.268996	0.214221
0.624556	0.187062	0.27636	0.225974
0.625813	0.195895	0.282821	0.236886
0.62707	0.203947	0.288391	0.246961
0.628326	0.211227	0.293081	0.256205
0.629583	0.217743	0.296905	0.264626
0.63084	0.223506	0.299877	0.27223
0.632096	0.228524	0.302011	0.279026
0.633353	0.232809	0.30332	0.285022
0.63461	0.23637	0.303821	0.290227
0.635866	0.23922	0.303529	0.294652
0.637123	0.24137	0.302459	0.298306
0.63838	0.242831	0.300629	0.301201
0.639636	0.243617	0.298054	0.303347
0.640893	0.243739	0.294752	0.304758
0.64215	0.243211	0.290741	0.305445
0.643406	0.242046	0.286038	0.305421
0.644663	0.240258	0.280661	0.3047
0.64592	0.237861	0.27463	0.303295
0.647176	0.234869	0.267963	0.301221
0.648433	0.231296	0.260679	0.298492
0.649689	0.227157	0.252798	0.295123
0.650946	0.222468	0.244338	0.291129
0.652203	0.217242	0.235321	0.286527
0.653459	0.211497	0.225765	0.281332
0.654716	0.205247	0.215691	0.275561
0.655973	0.198507	0.20512	0.269231
0.657229	0.191295	0.194071	0.262358
0.658486	0.183626	0.182567	0.25496
0.659743	0.175516	0.170627	0.247054
0.660999	0.166982	0.158273	0.238658
0.662256	0.15804	0.145526	0.229789
0.663513	0.148707	0.132408	0.220467
0.664769	0.139	0.118942	0.21071
0.666026	0.128935	0.105153	0.200535
0.667283	0.118529	0.091073	0.189963
0.668539	0.1078	0.0767573	0.17901
0.669796	0.0967638	0.0624679	0.167697
0.671053	0.0854385	0.0570577	0.156043
0.672309	0.0738415	0.0630219	0.144067
0.673566	0.0619912	0.0695663	0.131787
0.674823	0.0499073	0.0761664	0.119224
0.676079	0.0376145	0.0827613	0.106397
0.677336	0.0251603	0.0893314	0.0933255
0.678592	0.0129108	0.0958673	0.0800303
0.679849	0.0113564	0.102366	0.0665321
0.681106	0.0163724	0.108832	0.0528535
0.682362	0.0270301	0.1153	0.0390215
0.683619	0.040276	0.121951	0.0250822
0.684876	0.0536695	0.130658	0.0183651
0.686132	0.0671642	0.145284	0.0144162
0.687389	0.080738	0.161329	0.0192226
0.688646	0.0943728	0.177542	0.032929
0.689902	0.108052	0.193769	0.0472584
0.691159	0.121759	0.209959	0.0617285
0.692416	0.135479	0.226084	0.0762563
0.693672	0.149195	0.242122	0.0908055
0.694929	0.162893	0.258052	0.105352
0.696186	0.176557	0.273859	0.119874
0.697442	0.190174	0.289523	0.134354
0.698699	0.203728	0.30503	0.148774
0.699956	0.217205	0.320363	0.163117
0.701212	0.230591	0.335508	0.177366
0.702469	0.243872	0.35045	0.191506
0.703726	0.257036	0.365174	0.205521
0.704982	0.270068	0.379666	0.219396
0.706239	0.282955	0.393914	0.233116
0.707496	0.295686	0.407904	0.246666
0.708752	0.308248	0.421624	0.260033
0.710009	0.320628	0.435061	0.273203
0.711265	0.332814	0.448204	0.286162
0.712522	0.344796	0.461042	0.298898
0.713779	0.356563	0.473564	0.311398
0.715035	0.368102	0.485759	0.323651
0.716292	0.379405	0.497617	0.335645
0.717549	0.39046	0.50913	0.347368
0.718805	0.401257	0.520288	0.358809
0.720062	0.411788	0.531083	0.36996
0.721319	0.422043	0.541506	0.380809
0.722575	0.432014	0.55155	0.391347
0.723832	0.441691	0.561208	0.401566
0.725089	0.451067	0.570473	0.411457
0.726345	0.460135	0.579338	0.421011
0.727602	0.468886	0.587798	0.430222
0.728859	0.477313	0.595848	0.439082
0.730115	0.485411	0.603483	0.447584
0.731372	0.493173	0.610698	0.455723
0.732629	0.500592	0.61749	0.463492
0.733885	0.507665	0.623854	0.470887
0.735142	0.514385	0.629788	0.477903
0.736399	0.520747	0.63529	0.484535
0.737655	0.526748	0.640356	0.49078
0.738912	0.532384	0.644986	0.496635
0.740168	0.53765	0.649177	0.502095
0.741425	0.542545	0.65293	0.50716
0.742682	0.547064	0.656244	0.511827
0.743938	0.551206	0.659118	0.516094
0.745195	0.554969	0.661553	0.519961
0.746452	0.55835	0.663551	0.523427
0.747708	0.56135	0.665112	0.526492
0.748965	0.563966	0.666237	0.529155
0.750222	0.566199	0.66693	0.531419
0.751478	0.568048	0.667192	0.533283
0.752735	0.569513	0.667026	0.53475
0.753992	0.570596	0.666436	0.535821
0.755248	0.571297	0.665425	0.536498
0.756505	0.571618	0.663997	0.536785
0.757762	0.57156	0.662156	0.536685
0.759018	0.571125	0.659907	0.536201
0.760275	0.570316	0.657254	0.535337
0.761532	0.569136	0.654204	0.534097
0.762788	0.567587	0.650762	0.532486
0.764045	0.565674	0.646934	0.530508
0.765302	0.563399	0.642726	0.52817
0.766558	0.560768	0.638144	0.525477
0.767815	0.557785	0.633196	0.522434
0.769071	0.554454	0.627888	0.519048
0.770328	0.55078	0.622228	0.515326
0.771585	0.546769	0.616224	0.511274
0.772841	0.542427	0.609883	0.506899
0.774098	0.537759	0.603214	0.502209
0.775355	0.532771	0.596225	0.49721
0.776611	0.527471	0.588924	0.491912
0.777868	0.521865	0.581321	0.486323
0.779125	0.51596	0.573425	0.480449
0.780381	0.509763	0.565243	0.474301
0.781638	0.503282	0.556787	0.467886
0.782895	0.496525	0.548065	0.461213
0.784151	0.489499	0.539088	0.454292
0.785408	0.482213	0.529864	0.447132
0.786665	0.474675	0.520405	0.439741
0.787921	0.466894	0.510719	0.432131
0.789178	0.458878	0.500818	0.424309
0.790435	0.450636	0.490712	0.416287
0.791691	0.442179	0.480411	0.408073
0.792948	0.433514	0.469925	0.399678
0.794205	0.424651	0.459266	0.391112
0.795461	0.4156	0.448444	0.382385
0.796718	0.406371	0.437469	0.373508
0.797974	0.396973	0.426353	0.36449
0.799231	0.387416	0.415106	0.355342
0.800488	0.377711	0.403739	0.346075
0.801744	0.367867	0.392263	0.336699
0.803001	0.357894	0.380689	0.327225
0.804258	0.347803	0.369028	0.317663
0.805514	0.337604	0.35729	0.308025
0.806771	0.327308	0.345486	0.298322
0.808028	0.316924	0.333628	0.288563
0.809284	0.306464	0.321726	0.278762
0.810541	0.295937	0.30979	0.26893
0.811798	0.285354	0.297831	0.259078
0.813054	0.274725	0.28586	0.24922
0.814311	0.264061	0.273888	0.239368
0.815568	0.253373	0.261924	0.229537
0.816824	0.242669	0.249979	0.219743
0.818081	0.231962	0.238064	0.210003
0.819338	0.22126	0.226188	0.200338
0.820594	0.210574	0.214362	0.190773
0.821851	0.199915	0.202595	0.181337
0.823108	0.189291	0.190897	0.172069
0.824364	0.178714	0.179278	0.163018
0.825621	0.168192	0.167748	0.154246
0.826878	0.157736	0.156315	0.145827
0.828134	0.147355	0.144988	0.137835
0.829391	0.137059	0.133778	0.130326
0.830647	0.126856	0.122693	0.123311
0.831904	0.116757	0.111741	0.116748
0.833161	0.10677	0.100932	0.110563
0.834417	0.0969039	0.0902747	0.10467
0.835674	0.0871683	0.0797774	0.0989965
0.836931	0.077572	0.0694501	0.0934878
0.838187	0.0681241	0.0593047	0.0881039
0.839444	0.0588342	0.04936	0.0828178
0.840701	0.0497129	0.0396703	0.0776115
0.841957	0.0407736	0.0307811	0.0724734
0.843214	0.0320382	0.0302057	0.0673964
0.844471	0.023564	0.0319491	0.0623765
0.845727	0.0157894	0.0337022	0.0574122
0.846984	0.0124965	0.0353693	0.0525044
0.848241	0.0134487	0.0369348	0.0476572
0.849497	0.015427	0.0384008	0.0428848
0.850754	0.0184054	0.0397992	0.0382967
0.852011	0.0247894	0.0415078	0.0365153
0.853267	0.0317829	0.0471683	0.0371855
0.854524	0.038641	0.0543313	0.0423944
0.855781	0.0452918	0.0613486	0.0483981
0.857037	0.0517145	0.0681302	0.0542157
0.858294	0.0578988	0.074657	0.0598288
0.85955	0.063838	0.0809205	0.0652308
0.860807	0.0695266	0.0869153	0.0704176
0.862064	0.0749603	0.0926373	0.0753857
0.86332	0.0801353	0.0980831	0.0801327
0.864577	0.0850482	0.10325	0.084656
0.865834	0.0896961	0.108135	0.0889537
0.86709	0.0940764	0.112736	0.0930242
0.868347	0.0981868	0.117051	0.096866
0.869604	0.102026	0.121079	0.100478
0.87086	0.105591	0.124818	0.103859
0.872117	0.108881	0.128267	0.107009
0.873374	0.111896	0.131425	0.109927
0.87463	0.114634	0.134292	0.112613
0.875887	0.117096	0.136867	0.115066
0.877144	0.11928	0.139151	0.117288
0.8784	0.121187	0.141143	0.119278
0.879657	0.122817	0.142844	0.121037
0.880914	0.124172	0.144254	0.122566
0.88217	0.125251	0.145375	0.123866
0.883427	0.126057	0.146207	0.124938
0.884684	0.12659	0.146752	0.125783
0.88594	0.126852	0.147012	0.126403
0.887197	0.126845	0.146989	0.1268
0.888453	0.126572	0.146683	0.126976
0.88971	0.126035	0.146099	0.126932
0.890967	0.125236	0.145238	0.126671
0.892223	0.124179	0.144103	0.126195
0.89348	0.122867	0.142697	0.125506
0.894737	0.121303	0.141023	0.124609
0.895993	0.11949	0.139086	0.123504
0.89725	0.117433	0.136887	0.122196
0.898507	0.115135	0.134432	0.120686
0.899763	0.112601	0.131723	0.11898
0.90102	0.109835	0.128767	0.117079
0.902277	0.106842	0.125567	0.114988
0.903533	0.103626	0.122128	0.11271
0.90479	0.100193	0.118456	0.110248
0.906047	0.0965479	0.114555	0.107608
0.907303	0.0926956	0.110433	0.104792
0.90856	0.088642	0.106096	0.101806
0.909817	0.0843928	0.101552	0.0986531
0.911073	0.0799538	0.0968091	0.0953389
0.91233	0.0753312	0.0918798	0.0918682
0.913587	0.0705316	0.0867789	0.0882468
0.914843	0.0655617	0.0815287	0.0844811
0.9161	0.0604289	0.0761664	0.080579
0.917357	0.0551413	0.0707638	0.0765506
0.918613	0.0497086	0.0654867	0.0724112
0.91987	0.0441437	0.0607972	0.0681864
0.921126	0.0384664	0.0579427	0.0639279
0.922383	0.0327169	0.0580231	0.0597521
0.92364	0.0270089	0.0599712	0.0558986
0.924896	0.0217835	0.0626798	0.0525819
0.926153	0.0180151	0.0657058	0.0496563
0.92741	0.0153842	0.0688831	0.0468659
0.928666	0.0145887	0.0721402	0.0440782
0.929923	0.0166013	0.0754417	0.0412398
0.93118	0.0188596	0.0787676	0.0383295
0.932436	0.0211851	0.0821055	0.0353398
0.933693	0.0260416	0.0854468	0.0322705
0.93495	0.0328922	0.0887857	0.0291301
0.936206	0.0398129	0.0921176	0.0259538
0.937463	0.0467933	0.0954395	0.0231227
0.93872	0.0538251	0.0987493	0.0232236
0.939976	0.0609009	0.102047	0.0243762
0.941233	0.0680134	0.105333	0.0259543
0.94249	0.0751557	0.108612	0.0296136
0.943746	0.0823211	0.111896	0.0351755
0.945003	0.0895029	0.115205	0.0410891
0.94626	0.0966947	0.118587	0.0471087
0.947516	0.10389	0.122151	0.0531851
0.948773	0.111083	0.126157	0.0592998
0.950029	0.118266	0.131132	0.0654427
0.951286	0.125435	0.137467	0.0716064
0.952543	0.132583	0.144792	0.0777849
0.953799	0.139704	0.152589	0.0839727
0.955056	0.146793	0.160594	0.090165
0.956313	0.153844	0.168692	0.0963569
0.957569	0.160851	0.176827	0.102544
0.958826	0.167809	0.184968	0.108721
0.960083	0.174713	0.193096	0.114885
0.961339	0.181558	0.201198	0.12103
0.962596	0.188338	0.209261	0.127153
0.963853	0.195049	0.217278	0.13325
0.965109	0.201687	0.22524	0.139316
0.966366	0.208246	0.23314	0.145347
0.967623	0.214722	0.24097	0.151341
0.968879	0.221111	0.248726	0.157291
0.970136	0.227409	0.2564	0.163196
0.971393	0.233611	0.263987	0.169051
0.972649	0.239714	0.27148	0.174853
0.973906	0.245715	0.278876	0.180598
0.975163	0.251609	0.286168	0.186282
0.976419	0.257393	0.293351	0.191902
0.977676	0.263065	0.30042	0.197455
0.978932	0.26862	0.307371	0.202937
0.980189	0.274056	0.314199	0.208346
0.981446	0.27937	0.3209	0.213678
0.982702	0.28456	0.327468	0.218929
0.983959	0.289623	0.3339	0.224098
0.985216	0.294556	0.340192	0.229181
0.986472	0.299358	0.34634	0.234175
0.987729	0.304027	0.35234	0.239078
0.988986	0.30856	0.358189	0.243886
0.990242	0.312955	0.363882	0.248598
0.991499	0.317212	0.369418	0.25321
0.992756	0.321329	0.374791	0.25772
0.994012	0.325304	0.38	0.262126
0.995269	0.329137	0.385042	0.266426
0.996526	0.332825	0.389913	0.270617
0.997782	0.336369	0.394612	0.274697
0.999039	0.339768	0.399135	0.278664

## Sheet: DPPC_exptl_ORI
##################################################################################
## experimental X-ray scattering form factors obtained for ORI data
## Kucerka et al., Biophysical Journal 95 (2008) 2356-2367
##################################################################################
q	FF	deltaFF
0.20401	1.8208	0.1
0.20504	1.7872	0.1
0.20608	1.7853	0.1
0.20712	1.7713	0.1
0.20815	1.7515	0.1
0.20919	1.7421	0.1
0.21022	1.7309	0.1
0.21126	1.6849	0.1
0.2123	1.6759	0.1
0.21333	1.665	0.1
0.21437	1.6127	0.1
0.2154	1.5767	0.1
0.21644	1.5779	0.1
0.21748	1.5755	0.1
0.21851	1.5388	0.1
0.21955	1.5039	0.1
0.22058	1.4781	0.1
0.22162	1.4433	0.1
0.22265	1.4179	0.1
0.22369	1.398	0.1
0.22472	1.3668	0.1
0.22576	1.3256	0.1
0.22679	1.295	0.1
0.22783	1.2637	0.1
0.22886	1.2203	0.1
0.2299	1.1822	0.1
0.23093	1.1638	0.1
0.23197	1.159	0.1
0.233	1.1338	0.1
0.23404	1.0981	0.1
0.23507	1.071	0.1
0.23611	1.0542	0.1
0.23714	1.0223	0.1
0.23818	0.98885	0.1
0.23921	0.95992	0.1
0.24024	0.92877	0.1
0.24128	0.88373	0.1
0.24231	0.83786	0.1
0.24335	0.8239	0.1
0.24438	0.8128	0.1
0.24542	0.77925	0.1
0.24645	0.74699	0.1
0.24748	0.72092	0.1
0.24852	0.69688	0.1
0.24955	0.66187	0.1
0.25058	0.62077	0.1
0.25162	0.58898	0.1
0.25265	0.56816	0.1
0.25369	0.55421	0.1
0.25472	0.53938	0.1
0.25575	0.52151	0.1
0.25679	0.4899	0.1
0.25782	0.45152	0.1
0.25885	0.42973	0.1
0.25989	0.41224	0.1
0.26092	0.38707	0.1
0.26195	0.36029	0.1
0.26299	0.34188	0.1
0.26402	0.30257	0.1
0.26505	0.25699	0.1
0.26608	0.20773	0.1
0.26712	0.18729	0.1
0.26815	0.19472	0.1
0.26918	0.19346	0.1
0.27022	0.17223	0.1
0.27125	0.14788	0.1
0.27228	0.15294	0.1
0.27331	0.16638	0.1
0.27435	0.14231	0.1
0.27538	0.05224	0.1
0.27641	-0.09245	0.1
0.27744	-0.09501	0.1
0.27848	-0.11371	0.1
0.27951	-0.1355	0.1
0.28054	-0.13514	0.1
0.28157	-0.05015	0.1
0.28261	0.07711	0.1
0.28364	0.10444	0.1
0.28467	0.14818	0.1
0.2857	0.18697	0.1
0.28673	0.21615	0.1
0.28777	0.24541	0.1
0.2888	0.27477	0.1
0.28983	0.29221	0.1
0.29086	0.31968	0.1
0.29189	0.32881	0.1
0.29292	0.33836	0.1
0.29396	0.36476	0.1
0.29499	0.39148	0.1
0.29602	0.41149	0.1
0.29705	0.4313	0.1
0.29808	0.44471	0.1
0.29911	0.46212	0.1
0.30015	0.47497	0.1
0.30118	0.47747	0.1
0.30221	0.48247	0.1
0.30324	0.50781	0.1
0.30427	0.53767	0.1
0.3053	0.55484	0.1
0.30633	0.57724	0.1
0.30737	0.59599	0.1
0.3084	0.60005	0.1
0.30943	0.61409	0.1
0.31046	0.62213	0.1
0.31149	0.63118	0.1
0.31252	0.64158	0.1
0.31355	0.65868	0.1
0.31458	0.66557	0.1
0.31561	0.67366	0.1
0.31664	0.6827	0.1
0.31767	0.689	0.1
0.3187	0.70817	0.1
0.31973	0.71574	0.1
0.32077	0.7273	0.1
0.3218	0.73383	0.1
0.32283	0.74012	0.1
0.32386	0.74368	0.1
0.32489	0.73641	0.1
0.32592	0.75475	0.1
0.32695	0.7687	0.1
0.32798	0.76575	0.1
0.32901	0.76508	0.1
0.33004	0.77661	0.1
0.33107	0.778	0.1
0.3321	0.77223	0.1
0.33313	0.77279	0.1
0.33416	0.76585	0.1
0.33519	0.76774	0.1
0.33622	0.78146	0.1
0.33725	0.78064	0.1
0.33828	0.76837	0.1
0.33931	0.77066	0.1
0.34034	0.78877	0.2
0.34137	0.7804	0.2
0.3424	0.76812	0.2
0.34343	0.75407	0.2
0.34446	0.74455	0.2
0.34549	0.73438	0.2
0.34652	0.72425	0.2
0.34755	0.72083	0.2
0.34858	0.72435	0.2
0.3496	0.71579	0.2
0.35063	0.70778	0.2
0.35166	0.70926	0.2
0.35269	0.70587	0.2
0.35372	0.69737	0.2
0.35475	0.70097	0.2
0.35578	0.69432	0.2
0.35681	0.68647	0.2
0.35784	0.68546	0.2
0.35887	0.68617	0.2
0.3599	0.68597	0.2
0.36093	0.67616	0.2
0.36195	0.66509	0.2
0.36298	0.6555	0.2
0.36401	0.64352	0.2
0.36504	0.63741	0.2
0.36607	0.6356	0.2
0.3671	0.63035	0.2
0.36813	0.63054	0.2
0.36916	0.62835	0.2
0.37019	0.61802	0.2
0.37121	0.60205	0.2
0.37224	0.58191	0.2
0.37327	0.57475	0.2
0.3743	0.58301	0.2
0.37533	0.58643	0.2
0.37636	0.58745	0.2
0.37738	0.58592	0.2
0.37841	0.57682	0.2
0.37944	0.55998	0.2
0.38047	0.5433	0.2
0.3815	0.54292	0.2
0.38253	0.56002	0.2
0.38355	0.55185	0.2
0.38458	0.53448	0.2
0.38561	0.52965	0.2
0.38664	0.53382	0.2
0.38767	0.5325	0.2
0.38869	0.53474	0.2
0.38972	0.53574	0.2
0.39075	0.5276	0.08
0.39178	0.51702	0.08
0.3928	0.49594	0.08
0.39383	0.48444	0.08
0.39486	0.47126	0.08
0.39589	0.45919	0.08
0.39691	0.45464	0.08
0.39794	0.43848	0.08
0.39897	0.43015	0.08
0.4	0.41829	0.08
0.40102	0.40819	0.08
0.40205	0.39204	0.08
0.40308	0.37427	0.08
0.40411	0.35822	0.08
0.40513	0.34679	0.08
0.40616	0.34971	0.08
0.40719	0.33052	0.08
0.40822	0.29792	0.08
0.40924	0.27069	0.08
0.41027	0.24939	0.08
0.4113	0.24262	0.08
0.41232	0.25428	0.08
0.41335	0.25036	0.08
0.41438	0.25186	0.08
0.4154	0.24515	0.08
0.41643	0.20103	0.08
0.41746	0.21527	0.08
0.41848	0.1991	0.08
0.41951	0.16282	0.08
0.42054	0.17708	0.08
0.42156	0.1493	0.08
0.42259	0.13625	0.08
0.42362	0.12307	0.08
0.42464	0.10055	0.08
0.42567	0.0737	0.08
0.4267	0.07092	0.08
0.42772	0.07167	0.08
0.42875	-0.03951	0.08
0.42978	0.03055	0.08
0.4308	0.07749	0.08
0.43183	0.11781	0.08
0.43285	0.08366	0.08
0.43388	0.02627	0.08
0.43491	-0.04598	0.08
0.43593	0.01717	0.08
0.43696	0.08804	0.08
0.43798	0.10945	0.08
0.43901	0.13971	0.08
0.44004	0.19601	0.08
0.44106	0.18799	0.08
0.44209	0.15014	0.08
0.44311	0.11312	0.08
0.44414	0.11937	0.08
0.44516	0.12677	0.08
0.44619	0.1399	0.08
0.44722	0.16127	0.08
0.44824	0.19369	0.08
0.44927	0.21739	0.08
0.45029	0.22528	0.08
0.45132	0.2369	0.08
0.45234	0.25151	0.08
0.45337	0.26219	0.08
0.45439	0.26939	0.08
0.45542	0.27767	0.08
0.45644	0.28559	0.08
0.45747	0.28912	0.08
0.45849	0.30278	0.08
0.45952	0.32223	0.08
0.46054	0.31954	0.2
0.46157	0.31106	0.2
0.46259	0.3104	0.2
0.46362	0.31192	0.2
0.46464	0.32371	0.2
0.46567	0.32557	0.2
0.46669	0.33932	0.2
0.46772	0.34618	0.2
0.46874	0.35532	0.2
0.46977	0.36449	0.2
0.47079	0.37005	0.2
0.47182	0.36978	0.2
0.47284	0.37075	0.2
0.47387	0.38881	0.2
0.47489	0.40744	0.2
0.47591	0.40674	0.2
0.47694	0.40844	0.2
0.47796	0.42507	0.2
0.47899	0.43988	0.2
0.48001	0.44934	0.2
0.48104	0.45884	0.2
0.48206	0.4718	0.2
0.48308	0.48168	0.2
0.48411	0.48831	0.2
0.48513	0.49277	0.2
0.48616	0.49106	0.2
0.48718	0.5192	0.2
0.4882	0.53713	0.2
0.48923	0.53712	0.2
0.49025	0.5412	0.2
0.49127	0.55187	0.2
0.4923	0.56981	0.2
0.49332	0.5721	0.2
0.49435	0.58082	0.2
0.49537	0.58121	0.2
0.49639	0.59132	0.2
0.49742	0.60217	0.2
0.49844	0.60989	0.2
0.49946	0.61858	0.2
0.50049	0.61454	0.2
0.50151	0.6236	0.2
0.50253	0.60613	0.2
0.50356	0.61899	0.2
0.50458	0.62287	0.2
0.5056	0.63217	0.2
0.50662	0.63896	0.2
0.50765	0.6421	0.2
0.50867	0.63912	0.2
0.50969	0.64311	0.2
0.51072	0.64682	0.2
0.51174	0.64737	0.2
0.51276	0.65912	0.2
0.51378	0.647	0.2
0.51481	0.63585	0.2
0.51583	0.65489	0.2
0.51685	0.65418	0.2
0.51788	0.64565	0.2
0.5189	0.64133	0.2
0.51992	0.6214	0.2
0.52094	0.60329	0.2
0.52197	0.59953	0.2
0.52299	0.60125	0.2
0.52401	0.60713	0.2
0.52503	0.62255	0.2
0.52605	0.62102	0.2
0.52708	0.60795	0.2
0.5281	0.5927	0.2
0.52912	0.66455	0.2
0.53014	0.64448	0.2
0.53116	0.60833	0.2
0.53219	0.60202	0.2
0.53321	0.58337	0.2
0.53423	0.573	0.2
0.53525	0.58136	0.2
0.53627	0.58361	0.2
0.5373	0.55993	0.2
0.53832	0.53603	0.2
0.53934	0.52902	0.2
0.54036	0.53188	0.2
0.54138	0.53031	0.2
0.5424	0.52374	0.2
0.54342	0.52111	0.2
0.54445	0.52491	0.2
0.54547	0.51868	0.2
0.54649	0.49516	0.2
0.54751	0.46954	0.2
0.54853	0.46716	0.2
0.54955	0.47522	0.2
0.55057	0.47775	0.12
0.55159	0.472	0.12
0.55261	0.46563	0.12
0.55364	0.45413	0.12
0.55466	0.44382	0.12
0.55568	0.43398	0.12
0.5567	0.42335	0.12
0.55772	0.42631	0.12
0.55874	0.42869	0.12
0.55976	0.40478	0.12
0.56078	0.38141	0.12
0.5618	0.38747	0.12
0.56282	0.37721	0.12
0.56384	0.37695	0.12
0.56486	0.3793	0.12
0.56588	0.36268	0.12
0.5669	0.34683	0.12
0.56792	0.34301	0.12
0.56894	0.34168	0.12
0.56996	0.33587	0.12
0.57098	0.33825	0.12
0.572	0.34567	0.12
0.57302	0.34532	0.12
0.57404	0.32614	0.12
0.57506	0.30064	0.12
0.57608	0.28918	0.12
0.5771	0.32046	0.12
0.57812	0.31095	0.12
0.57914	0.29197	0.12
0.58016	0.28144	0.12
0.58118	0.2909	0.12
0.5822	0.29682	0.12
0.58322	0.29012	0.12
0.58424	0.2826	0.12
0.58526	0.24749	0.12
0.58628	0.22855	0.12
0.5873	0.25856	0.12
0.58832	0.26377	0.12
0.58934	0.24423	0.12
0.59036	0.22515	0.12
0.59138	0.20705	0.12
0.5924	0.2194	0.12
0.59341	0.24393	0.12
0.59443	0.24636	0.12
0.59545	0.22245	0.12
0.59647	0.2128	0.12
0.59749	0.20739	0.12
0.59851	0.19262	0.12
0.59953	0.14507	0.12
0.60098	0.14377	0.12
0.602	0.18158	0.12
0.60302	0.19845	0.12
0.60403	0.20193	0.12
0.60505	0.1866	0.12
0.60607	0.18451	0.12
0.60709	0.18347	0.12
0.60811	0.17277	0.12
0.60913	0.16724	0.12
0.61014	0.15149	0.12
0.61116	0.11408	0.12
0.61218	0.13381	0.12
0.6132	0.16023	0.12
0.61422	0.18447	0.12
0.61523	0.15602	0.12
0.61625	0.13808	0.12
0.61727	0.15494	0.12
0.61829	0.15539	0.12
0.61931	0.13797	0.12
0.62032	0.1256	0.12
0.62134	0.11449	0.12
0.62236	0.12383	0.12
0.62338	0.09197	0.12
0.62439	0.10132	0.12
0.62541	0.1225	0.12
0.62643	0.1184	0.12
0.62745	0.11347	0.12
0.62846	0.10611	0.12
0.62948	0.10968	0.12
0.6305	0.13763	0.12
0.63152	0.14085	0.12
0.63253	0.09839	0.12
0.63355	0.05849	0.12
0.63457	0.05548	0.12
0.63558	0.07204	0.12
0.6366	0.10114	0.12
0.63762	0.08547	0.12
0.63863	0.00873	0.12
0.63965	-0.02649	0.12
0.64067	0.02496	0.12
0.64168	0.05076	0.12
0.6427	0.08623	0.12
0.64372	0.08772	0.12
0.64473	0.0521	0.12
0.64575	-0.04983	0.12
0.64677	0.08309	0.12
0.64778	0.12459	0.12
0.6488	0.1155	0.12
0.64981	0.14046	0.12
0.65083	0.14747	0.12
0.65185	0.12429	0.12
0.65286	0.0729	0.12
0.65388	0.04569	0.12
0.65489	0.10144	0.12
0.65591	0.13226	0.12
0.65693	0.11806	0.12
0.65794	-0.10215	0.12
0.65896	-0.12758	0.12
0.65997	-0.09257	0.12
0.66099	-0.12117	0.12
0.662	-0.12251	0.12
0.66302	-0.03679	0.12
0.66403	0.07239	0.12
0.66505	0.09226	0.12
0.66607	0.14004	0.12
0.66708	0.12733	0.12
0.6681	-0.02899	0.12
0.66911	-0.03444	0.12
0.67013	0.08165	0.12
0.67114	0.02942	0.12
0.67216	-0.04354	0.12
0.67317	0.04433	0.12
0.67419	0.05033	0.12
0.6752	0.07054	0.12
0.67622	0.1242	0.12
0.67723	0.15044	0.12
0.67824	0.13744	0.12
0.67926	0.10679	0.12
0.68027	-0.07142	0.12
0.68129	-0.06922	0.12
0.6823	0.10264	0.12
0.68332	0.12829	0.12
0.68433	0.12125	0.12
0.68535	0.11688	0.12
0.68636	0.142	0.12
0.68737	0.1589	0.12
0.68839	0.1397	0.12
0.6894	0.15682	0.12
0.69042	0.11762	0.12
0.69143	0.07878	0.12
0.69244	-0.04317	0.12
0.69346	-0.07052	0.12
0.69447	0.07845	0.12
0.69548	0.11407	0.12
0.6965	0.10007	0.12
0.69751	0.04957	0.12
0.69853	-0.03599	0.12
0.69954	0.04999	0.12
0.70055	0.12354	0.12
0.70157	0.12381	0.12
0.70258	0.10314	0.12
0.70359	0.10858	0.12
0.70461	0.11255	0.12
0.70562	0.0588	0.12
0.70663	-0.04015	0.12
0.70765	0.02949	0.12
0.70866	0.024	0.12
0.70967	0.04583	0.12
0.71068	0.10743	0.12
0.7117	0.13882	0.12
0.71271	0.14628	0.12
0.71372	0.11741	0.12
0.71473	0.0557	0.12
0.71575	0.08064	0.12
0.71676	0.13097	0.12
0.71777	0.15275	0.12
0.71878	0.1392	0.12
0.7198	0.11267	0.12
0.72081	0.1218	0.12
0.72182	0.14719	0.12
0.72283	0.15487	0.12
0.72385	0.14974	0.12
0.72486	0.12604	0.12
0.72587	0.14525	0.12
0.72688	0.15976	0.12
0.72789	0.14648	0.12
0.7289	0.11328	0.12
0.72992	0.10571	0.12
0.73093	0.11692	0.12
0.73194	0.14252	0.12
0.73295	0.16902	0.12
0.73396	0.13773	0.12
0.73497	0.11565	0.12
0.73599	0.14389	0.12
0.737	0.13999	0.12
0.73801	0.14038	0.12
0.73902	0.13729	0.12
0.74003	0.11866	0.12
0.74104	0.1506	0.12
0.74205	0.18486	0.12
0.74306	0.16384	0.12
0.74407	0.23363	0.12
0.74509	0.20026	0.12
0.7461	0.1398	0.12
0.74711	0.14911	0.12
0.74812	0.15941	0.12
0.74913	0.13431	0.12
0.75014	0.2073	0.12
0.75115	0.1827	0.12
0.75216	0.21137	0.12
0.75317	0.20234	0.12
0.75418	0.15345	0.12
0.75519	0.10528	0.12
0.7562	0.09152	0.12
0.75721	0.12022	0.12
0.75822	0.15389	0.12
0.75923	0.1611	0.12
0.76024	0.11451	0.12
0.76125	0.07957	0.12
0.76226	0.14115	0.12
0.76327	0.1865	0.12
0.76428	0.1974	0.12
0.76529	0.17492	0.12
0.7663	0.18644	0.12
0.76731	0.22461	0.12
0.76832	0.26392	0.12
0.76933	0.26406	0.12
0.77034	0.23592	0.12
0.77135	0.22801	0.12
0.77236	0.24153	0.12
0.77336	0.20543	0.12
0.77437	0.13778	0.12
0.77538	0.15404	0.12
0.77639	0.16576	0.12
0.7774	0.13959	0.12
0.77841	0.09554	0.12
0.77942	0.08665	0.12
0.78043	0.161	0.12
0.78144	0.2368	0.12
0.78244	0.25087	0.12
0.78345	0.19698	0.12
0.78446	0.175	0.12
0.78547	0.20429	0.12
0.78648	0.19956	0.12
0.78749	0.20994	0.12
0.78849	0.24284	0.12
0.7895	0.27298	0.12
0.79051	0.25691	0.12
0.79152	0.23223	0.12
0.79253	0.19342	0.12
0.79353	0.09982	0.12
0.79454	0.07902	0.12
0.79555	0.15701	0.12
0.79656	0.17734	0.12
0.79757	0.10917	0.12
0.79857	0.11069	0.12
0.79958	0.13332	0.12
0.80059	0.14443	0.12
0.8016	0.16737	0.12
0.8026	0.1653	0.12
0.80361	0.14395	0.12
0.80462	0.17413	0.12
0.80562	0.18241	0.12
0.80663	0.11215	0.12
0.80764	0.13136	0.12
0.80864	0.21208	0.12
0.80965	0.20842	0.12
0.81066	0.19387	0.12
0.81167	0.15869	0.12
0.81267	0.19468	0.12
0.81368	0.14812	0.12
0.81469	0.18062	0.12
0.81569	0.2394	0.12
0.8167	0.19429	0.12
0.8177	0.02689	0.12
0.81871	0.07973	0.12
0.81972	0.03445	0.12
0.82072	0.10385	0.12
0.82173	0.21122	0.12
0.82273	0.26711	0.12
0.82374	0.24525	0.12
0.82475	0.11815	0.12
0.82575	-0.11733	0.12
0.82676	0.08668	0.12
0.82776	0.18243	0.12
0.82877	0.19575	0.12
0.82977	0.18142	0.12
0.83078	0.16033	0.12
0.83179	0.14166	0.12
0.83279	0.1148	0.12
0.8338	0.09039	0.12
0.8348	0.0962	0.12
0.83581	0.12934	0.12
0.83681	0.1671	0.12
0.83782	0.14671	0.12
0.83882	0.15518	0.12
0.83983	0.13777	0.12
0.84083	0.07021	0.12
0.84184	-0.03286	0.12
0.84284	-0.08526	0.12
0.84385	-0.13719	0.12
0.84485	0.03029	0.12
0.84586	0.17145	0.12
0.84686	0.13367	0.12
0.84786	0.15118	0.12
0.84887	0.18587	0.12
0.84987	0.16594	0.12
0.85088	0.16679	0.12
0.85188	0.10198	0.12
0.85288	-0.09462	0.12
0.85389	0.12328	0.12
0.85489	0.15771	0.12
0.8559	-0.05583	0.12
0.8569	-0.01602	0.12
0.8579	0.01467	0.12
0.85891	0.08682	0.12
0.85991	0.16246	0.12
0.86091	0.13105	0.12
0.86192	0.17518	0.12
0.86292	0.222	0.12
0.86392	0.25245	0.12
0.86493	0.21806	0.12
0.86593	0.16797	0.12
0.86693	0.16157	0.12
0.86794	0.18689	0.12
0.86894	0.21557	0.12
0.86994	0.20821	0.12
0.87095	0.20232	0.12
0.87195	0.18315	0.12
0.87295	0.10594	0.12
0.87395	0.03827	0.12
0.87496	0.23013	0.12
0.87596	0.25448	0.12
0.87696	0.18311	0.12
0.87796	0.18988	0.12
0.87897	0.18116	0.12
0.87997	-0.05844	0.12
0.88097	-0.08313	0.12

## Sheet: DPPC_exptl_ULV
##################################################################################
## experimental scattering form factors obtained for ULV data
## Kucerka et al., Biochim Biophys Acta - Biomembranes 1808 (2011) 2761-2771	##
##################################################################################
##
## redefinition of scattering power for D such that water corresponds to 0% D2O
#SLwin
#set e(1) 1.0
#setRHO_wat X 0.3303
#updateSIM
##
q	FF	deltaFF
0.0607	0.69045	0.1
0.06158	0.70439	0.1
0.06246	0.72295	0.1
0.06334	0.74044	0.1
0.06422	0.75144	0.1
0.0651	0.7679	0.1
0.06598	0.78197	0.1
0.06686	0.80655	0.1
0.06774	0.82755	0.1
0.06862	0.84909	0.1
0.0695	0.87081	0.1
0.07038	0.88518	0.1
0.07126	0.90455	0.1
0.07214	0.92206	0.1
0.07302	0.94763	0.1
0.0739	0.96783	0.1
0.07478	0.98719	0.1
0.07566	1.0095	0.1
0.07654	1.0306	0.1
0.07741	1.0485	0.1
0.0783	1.0669	0.1
0.07917	1.089	0.1
0.08005	1.1067	0.1
0.08093	1.1234	0.1
0.08181	1.1443	0.1
0.08269	1.1649	0.1
0.08357	1.1858	0.1
0.08445	1.2026	0.1
0.08533	1.224	0.1
0.08621	1.2461	0.1
0.08709	1.2667	0.1
0.08797	1.2843	0.1
0.08885	1.3014	0.1
0.08973	1.3208	0.1
0.09061	1.3405	0.1
0.09149	1.3574	0.1
0.09237	1.3783	0.1
0.09325	1.3983	0.1
0.09413	1.4126	0.1
0.09501	1.4365	0.1
0.09588	1.4565	0.1
0.09677	1.4722	0.1
0.09764	1.4847	0.1
0.09852	1.5015	0.1
0.0994	1.5233	0.1
0.10028	1.544	0.1
0.10116	1.56	0.1
0.10204	1.5746	0.1
0.10292	1.5876	0.1
0.1038	1.6026	0.1
0.10468	1.6206	0.1
0.10556	1.6369	0.1
0.10644	1.6519	0.1
0.10732	1.6675	0.1
0.1082	1.6816	0.1
0.10908	1.7006	0.1
0.10996	1.7198	0.1
0.11084	1.7319	0.1
0.11171	1.7463	0.1
0.11259	1.7616	0.1
0.11347	1.7732	0.1
0.11435	1.7889	0.1
0.11523	1.7969	0.1
0.11611	1.8125	0.1
0.11699	1.8272	0.1
0.11787	1.8424	0.1
0.11875	1.8561	0.1
0.11963	1.8616	0.1
0.12051	1.8758	0.1
0.12139	1.8881	0.1
0.12227	1.9025	0.1
0.12315	1.9134	0.1
0.12403	1.9247	0.1
0.1249	1.9347	0.1
0.12578	1.9474	0.1
0.12666	1.9645	0.1
0.12754	1.9734	0.1
0.12842	1.9812	0.1
0.1293	1.9867	0.1
0.13018	1.9964	0.1
0.13106	2.0099	0.1
0.13194	2.0226	0.1
0.13282	2.0285	0.1
0.1337	2.0332	0.1
0.13458	2.0492	0.1
0.13545	2.0579	0.1
0.13633	2.0633	0.1
0.13721	2.0729	0.1
0.13809	2.0811	0.1
0.13897	2.0899	0.1
0.13985	2.1	0.1
0.14073	2.1082	0.1
0.14161	2.1157	0.1
0.14249	2.1219	0.1
0.14337	2.1297	0.1
0.14425	2.1343	0.1
0.14512	2.1434	0.1
0.146	2.1501	0.1
0.14688	2.1552	0.1
0.14776	2.1618	0.1
0.14864	2.1618	0.1
0.14952	2.1662	0.1
0.1504	2.1716	0.1
0.15128	2.1753	0.1
0.15216	2.1801	0.1
0.15304	2.1867	0.1
0.15392	2.1891	0.1
0.15479	2.1874	0.1
0.15567	2.1945	0.1
0.15655	2.1984	0.1
0.15743	2.1993	0.1
0.15831	2.1965	0.1
0.15919	2.1975	0.1
0.16007	2.198	0.1
0.16095	2.1965	0.1
0.16183	2.1933	0.1
0.1627	2.1942	0.1
0.16358	2.1953	0.1
0.16446	2.1935	0.1
0.16534	2.1938	0.1
0.16622	2.1914	0.1
0.1671	2.1872	0.1
0.16798	2.1841	0.1
0.16886	2.1822	0.1
0.16973	2.1813	0.1
0.17061	2.1759	0.1
0.17149	2.1735	0.1
0.17237	2.1694	0.1
0.17325	2.1667	0.1
0.17413	2.1567	0.1
0.17501	2.1472	0.1
0.17589	2.141	0.1
0.17676	2.1332	0.1
0.17764	2.1254	0.1
0.17852	2.1182	0.1
0.1794	2.1128	0.1
0.18028	2.1055	0.1
0.18116	2.0959	0.1
0.18204	2.0841	0.1
0.18291	2.0716	0.1
0.18379	2.0617	0.1
0.18467	2.0513	0.1
0.18555	2.0437	0.1
0.18643	2.0303	0.1
0.18731	2.013	0.1
0.18819	2.0023	0.1
0.18907	1.9927	0.1
0.18994	1.98	0.1
0.19082	1.9652	0.1
0.1917	1.9534	0.1
0.19258	1.9402	0.1
0.19346	1.9241	0.1
0.19434	1.9052	0.1
0.19522	1.8925	0.1
0.19609	1.8745	0.1
0.19697	1.8595	0.1
0.19785	1.841	0.1
0.19873	1.8215	0.1
0.19961	1.8063	0.1
0.20049	1.7903	0.1
0.20136	1.775	0.1
0.20224	1.7585	0.1
0.20312	1.7416	0.1
0.204	1.7201	0.1
0.20488	1.7037	0.1
0.20575	1.691	0.1
0.20663	1.6727	0.1
0.20751	1.6519	0.1
0.20839	1.6329	0.1
0.20927	1.6134	0.1
0.21015	1.5913	0.1
0.21102	1.5712	0.1
0.2119	1.5477	0.1
0.21278	1.5342	0.1
0.21366	1.517	0.1
0.21454	1.4956	0.1
0.21542	1.4786	0.1
0.21629	1.46	0.1
0.21717	1.4382	0.1
0.21805	1.4171	0.1
0.21893	1.392	0.1
0.21981	1.3755	0.1
0.22068	1.3512	0.1
0.22156	1.3314	0.1
0.22244	1.3108	0.1
0.22332	1.2944	0.1
0.2242	1.2733	0.1
0.22508	1.2491	0.1
0.22595	1.2257	0.1
0.22683	1.2019	0.1
0.22771	1.1867	0.1
0.22859	1.1705	0.1
0.22947	1.1445	0.1
0.23034	1.1204	0.1
0.23122	1.1089	0.1
0.2321	1.0894	0.1
0.23298	1.0654	0.1
0.23386	1.0443	0.1
0.23473	1.0379	0.1
0.23561	1.0095	0.1
0.23649	0.9773	0.1
0.23737	0.95577	0.1
0.23824	0.94077	0.1
0.23912	0.92545	0.1
0.24	0.90321	0.1
0.24088	0.88672	0.1
0.24176	0.8796	0.1
0.24263	0.85831	0.1
0.24351	0.83012	0.1
0.24439	0.80617	0.1
0.24527	0.79223	0.1
0.24614	0.77374	0.1
0.24702	0.74892	0.1
0.2479	0.74382	0.1
0.24878	0.7233	0.1
0.24965	0.70703	0.1
0.25053	0.68051	0.1
0.25141	0.65482	0.1
0.25229	0.64343	0.1
0.25316	0.62944	0.1
0.25404	0.61896	0.1
0.25492	0.60329	0.1
0.2558	0.59856	0.1
0.25667	0.59687	0.1
0.25755	0.56151	0.1
0.25843	0.52524	0.1
0.25931	0.51231	0.1
0.26019	0.48299	0.1
0.26106	0.46572	0.1
0.26194	0.46371	0.1
0.26282	0.44704	0.1
0.26369	0.46782	0.1
0.26457	0.45128	0.1
0.26545	0.429	0.1
0.26633	0.40022	0.1
0.2672	0.39064	0.1
0.26808	0.39003	0.1
0.26896	0.3914	0.1
0.26983	0.3916	0.1
0.27071	0.39264	0.1
0.27159	0.38583	0.1
0.27247	0.37217	0.1
0.27334	0.38992	0.1
0.27422	0.3862	0.1
0.2751	0.39718	0.1
0.27598	0.39101	0.1
0.27685	0.37448	0.1
0.27773	0.36347	0.1
0.27861	0.36586	0.1
0.27948	0.34382	0.1
0.28036	0.38661	0.1
0.28124	0.40036	0.1
0.28212	0.40224	0.1
0.28299	0.41687	0.1
0.28387	0.39129	0.1
0.28475	0.39392	0.1
0.28562	0.41675	0.1
0.2865	0.41632	0.1
0.28738	0.4238	0.1
0.28825	0.41011	0.1
0.28913	0.41896	0.1
0.29001	0.4532	0.1
0.29089	0.47898	0.1
0.29176	0.4767	0.1
0.29264	0.46059	0.1
0.29352	0.48504	0.1
0.29439	0.49646	0.1
0.29527	0.51893	0.1
0.29615	0.5182	0.1
0.29702	0.52424	0.1
0.2979	0.5417	0.1
0.29878	0.53886	0.1
0.29965	0.54871	0.1
0.30053	0.55399	0.1
0.30141	0.57178	0.1
0.30228	0.57286	0.1
0.30316	0.58382	0.1
0.30404	0.58559	0.1
0.30491	0.5863	0.1
0.30579	0.59186	0.1
0.30667	0.60434	0.1
0.30754	0.61676	0.1
0.30842	0.62585	0.1
0.30929	0.61471	0.1
0.31017	0.63212	0.1
0.31105	0.64634	0.1
0.31192	0.66472	0.1
0.3128	0.66668	0.1
0.31368	0.66492	0.1
0.31455	0.65822	0.1
0.31543	0.66138	0.1
0.31631	0.67892	0.1
0.31718	0.68669	0.1
0.31806	0.70615	0.1
0.31894	0.70045	0.1
0.31981	0.69084	0.1
0.32069	0.69745	0.1
0.32156	0.71036	0.1
0.32244	0.71004	0.1
0.32332	0.72649	0.1
0.32419	0.72771	0.1
0.32507	0.71187	0.1
0.32594	0.70987	0.1
0.32682	0.71291	0.1
0.3277	0.7186	0.1
0.32857	0.72301	0.1
0.32945	0.72714	0.1
0.33032	0.72839	0.1
0.3312	0.73082	0.1
0.33208	0.73793	0.1
0.33295	0.73424	0.1
0.33383	0.73499	0.1
0.3347	0.71923	0.1
0.33558	0.73704	0.1
0.33646	0.74309	0.1
0.33733	0.74087	0.1
0.33821	0.74772	0.1
0.33908	0.75024	0.1
0.33996	0.74017	0.1
0.34084	0.74076	0.1
0.34171	0.7376	0.1
0.34259	0.72105	0.1
0.34346	0.74074	0.1
0.34434	0.72181	0.1
0.34521	0.69926	0.1
0.34609	0.70653	0.1
0.34697	0.74354	0.1
0.34784	0.73178	0.1
0.34872	0.69349	0.1
0.34959	0.70618	0.1
0.35047	0.70726	0.1
0.35134	0.7021	0.1
0.35222	0.6909	0.1
0.35309	0.68833	0.1
0.35397	0.7033	0.1
0.35484	0.70325	0.1
0.35572	0.6848	0.1
0.3566	0.6624	0.1
0.35747	0.67346	0.1
0.35835	0.68183	0.1
0.35922	0.67773	0.1
0.3601	0.67039	0.1
0.36097	0.6436	0.1
0.36185	0.64823	0.1
0.36272	0.64728	0.1
0.3636	0.63499	0.1
0.36447	0.65081	0.1
0.36535	0.64937	0.1
0.36622	0.6301	0.1
0.3671	0.62092	0.1
0.36797	0.62484	0.1
0.36885	0.62152	0.1
0.36972	0.60328	0.1
0.3706	0.59445	0.1
0.37147	0.5919	0.1
0.37235	0.59234	0.1
0.37322	0.57094	0.1
0.3741	0.59599	0.1
0.37497	0.55711	0.1
0.37585	0.56976	0.1
0.37672	0.58035	0.1
0.3776	0.54687	0.1
0.37847	0.50854	0.1
0.37935	0.5011	0.1
0.38022	0.52051	0.1
0.3811	0.52061	0.1
0.38197	0.53418	0.1
0.38285	0.50895	0.1
0.38372	0.49768	0.1
0.3846	0.42629	0.1
0.38547	0.41822	0.1
0.38634	0.44109	0.1
0.38722	0.4349	0.1
0.38809	0.44488	0.1
0.38897	0.44736	0.1
0.38984	0.44813	0.1
0.39072	0.4426	0.1
0.39159	0.42564	0.1
0.39247	0.46129	0.1
0.39334	0.44734	0.1
0.39422	0.42407	0.1
0.39509	0.43123	0.1
0.39597	0.42062	0.1
0.39684	0.39044	0.1
0.39771	0.37409	0.1
0.39859	0.3859	0.1
0.39946	0.41176	0.1
0.40034	0.42997	0.1
0.40121	0.41156	0.1
0.40208	0.39607	0.1
0.40296	0.37714	0.1
0.40383	0.37309	0.1
0.40471	0.22166	0.1
0.40558	0.28626	0.1
0.40646	0.33744	0.1
0.40733	0.37569	0.1
0.4082	0.40576	0.1
0.40908	0.37664	0.1
0.40995	0.39018	0.1
0.41083	0.35377	0.1
0.4117	0.3054	0.1
0.41257	0.29168	0.1
0.41345	0.28415	0.1
0.41432	0.30486	0.1
0.41519	0.32124	0.1
0.41607	0.33038	0.1
0.41694	0.28972	0.1
0.41782	0.2832	0.1
0.41869	0.29026	0.1
0.41956	0.32367	0.1
0.42044	0.33585	0.1
0.42131	0.29139	0.1
0.42218	0.26926	0.1
0.42306	0.2461	0.1
0.42393	0.32069	0.1
0.4248	0.32233	0.1
0.42568	0.2528	0.1
0.42655	0.16596	0.1
0.42743	0.2714	0.1
0.4283	0.32171	0.1
0.42917	0.28244	0.1
0.43005	0.26711	0.1
0.43092	0.28249	0.1
0.43179	0.34003	0.1
0.43267	0.35763	0.1
0.43354	0.35262	0.1
0.43441	0.35124	0.1
0.43528	0.36097	0.1
0.43616	0.34468	0.1
0.43703	0.34851	0.1
0.4379	0.35386	0.1
0.43878	0.3621	0.1
0.43965	0.362	0.1
0.44052	0.38	0.1
0.4414	0.36002	0.1
0.44227	0.37161	0.1
0.44314	0.4303	0.1
0.44402	0.41853	0.1
0.44489	0.46093	0.1
0.44576	0.38851	0.1
0.44664	0.40496	0.1
0.44751	0.44952	0.1
0.44838	0.4694	0.1
0.44925	0.43252	0.1
0.45013	0.34244	0.1
0.451	0.35589	0.1
0.45187	0.369	0.1
0.45275	0.40393	0.1
0.45362	0.42408	0.1
0.45449	0.4013	0.1
0.45536	0.41807	0.1
0.45624	0.40123	0.1
0.45711	0.43654	0.1
0.45798	0.41691	0.1
0.45885	0.45685	0.1
0.45972	0.46244	0.1
0.4606	0.44146	0.1
0.46147	0.46457	0.1
0.46234	0.45404	0.1
0.46321	0.45954	0.1
0.46409	0.50867	0.1
0.46496	0.49969	0.1
0.46583	0.48415	0.1
0.4667	0.45824	0.1
0.46758	0.47347	0.1
0.46845	0.48046	0.1
0.46932	0.49108	0.1
0.47019	0.48498	0.1
0.47107	0.52977	0.1
0.47194	0.53839	0.1
0.47281	0.49878	0.1
0.47368	0.48791	0.1
0.47455	0.4279	0.1
0.47542	0.38737	0.1
0.4763	0.43606	0.1
0.47717	0.48529	0.1
0.47804	0.49018	0.1
0.47891	0.51155	0.1
0.47978	0.49608	0.1
0.48066	0.53155	0.1
0.48153	0.5711	0.1
0.4824	0.55894	0.1
0.48327	0.50104	0.1
0.48414	0.47757	0.1
0.48501	0.5403	0.1
0.48589	0.54467	0.1
0.48676	0.52204	0.1
0.48763	0.53849	0.1
0.4885	0.5271	0.1
0.48937	0.51989	0.1
0.49024	0.54252	0.1
0.49112	0.57437	0.1
0.49199	0.48014	0.1
0.49286	0.49916	0.1
0.49373	0.53307	0.1
0.4946	0.54954	0.1
0.49547	0.51384	0.1
0.49634	0.48589	0.1
0.49722	0.53681	0.1
0.49809	0.56188	0.1
0.49896	0.55444	0.1
0.49983	0.55596	0.1
0.5007	0.52759	0.1
0.50157	0.46499	0.1
0.50244	0.51515	0.1
0.50331	0.53332	0.1
0.50418	0.50262	0.1
0.50506	0.47879	0.1
0.50593	0.47417	0.1
0.5068	0.48549	0.1
0.50767	0.40756	0.1
0.50854	0.42166	0.1
0.50941	0.50218	0.1
0.51028	0.5032	0.1
0.51115	0.44532	0.1
0.51202	0.4632	0.1
0.51289	0.48014	0.1
0.51376	0.44509	0.1
0.51463	0.41978	0.1
0.5155	0.45839	0.1
0.51638	0.44593	0.1
0.51724	0.44512	0.1
0.51812	0.43576	0.1
0.51899	0.43477	0.1
0.51986	0.41525	0.1
0.52073	0.41774	0.1
0.5216	0.45188	0.1
0.52247	0.45685	0.1
0.52334	0.44739	0.1
0.52421	0.44085	0.1
0.52508	0.39216	0.1
0.52595	0.37165	0.1
0.52682	0.37857	0.1
0.52769	0.39565	0.1
0.52856	0.28991	0.1
0.52943	0.37555	0.1
0.5303	0.31592	0.1
0.53117	0.37228	0.1
0.53204	0.2947	0.1
0.53291	0.25499	0.1
0.53378	0.34506	0.1
0.53465	0.38928	0.1
0.53552	0.35956	0.1
0.53639	0.33795	0.1
0.53726	0.35151	0.1
0.53813	0.39416	0.1
0.539	0.29065	0.1
0.53987	0.1807	0.1
0.54074	0.3987	0.1
0.54161	0.41884	0.1
0.54248	0.43719	0.1
0.54335	0.43563	0.1
0.54422	0.34277	0.1
0.54509	0.39453	0.1
0.54595	0.35957	0.1
0.54683	0.21736	0.1
0.54769	0.099348	0.1
0.54856	0.25874	0.1
0.54943	0.41016	0.1
0.5503	0.2992	0.1
0.55117	0.27024	0.1
0.55204	0.24305	0.1
0.55291	0.28963	0.1
0.55378	0.35123	0.1
0.55465	0.38625	0.1
0.55552	0.38673	0.1
0.55639	0.38171	0.1
0.55726	0.41419	0.1
0.55812	0.35212	0.1
0.55899	0.3409	0.1
0.55986	0.22189	0.1
0.56073	0.19441	0.1
0.5616	0.27919	0.1
0.56247	0.24853	0.1
0.56334	0.25611	0.1
0.56421	0.1827	0.1
0.56508	0.18134	0.1
0.56594	0.18701	0.1
0.56681	-0.21404	0.1
0.56768	0.15362	0.1
0.56855	0.21753	0.1
0.56942	0.25217	0.1
0.57029	0.24955	0.1
0.57116	0.022444	0.1
0.57203	-0.27835	0.1
0.57289	-0.20278	0.1
0.57376	-0.16845	0.1
0.57463	-0.19642	0.1
0.5755	-0.199	0.1
0.57637	-0.20623	0.1
0.57724	-0.30103	0.1
0.5781	-0.31889	0.1
0.57897	-0.14342	0.1
0.57984	-0.24532	0.1
0.58071	-0.28556	0.1
0.58158	-0.33441	0.1
0.58244	0.17814	0.1
0.58331	0.29281	0.1
0.58418	0.3162	0.1
0.58505	0.10588	0.1
0.58592	-0.11348	0.1
0.58678	-0.25034	0.1
0.58765	0.30153	0.1
0.58852	0.2892	0.1
0.58939	0.17188	0.1
0.59025	0.24402	0.1
0.59112	-0.017849	0.1
0.59199	-0.20193	0.1
0.59286	-0.1508	0.1
0.59372	0.21362	0.1
0.59459	-0.22064	0.1
0.59546	-0.34075	0.1
0.59633	-0.42482	0.1
0.5972	-0.40201	0.1
0.59806	-0.21721	0.1
0.59893	-0.18266	0.1
